# Supplementary material for: Antisense oligonucleotide therapy rescues disturbed brain rhythms and sleep in juvenile and adult mouse models of Angelman syndrome
Source: eLife journal article supplement (doi:10.7554/elife.81892), 2023-01-03

### 3 weeks post ASO injection to juvenile mice

Figure 3B. Anterior cortex

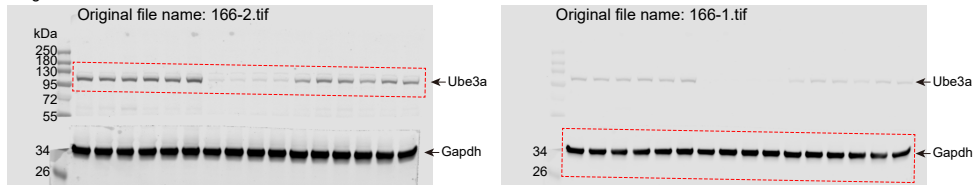

Figure 3B. Hippocampus

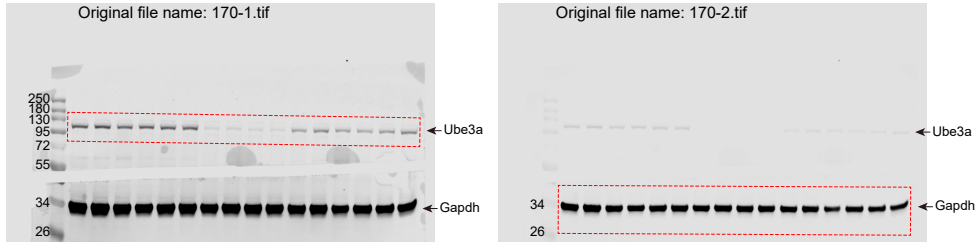

### 10 weeks post ASO injection to juvenile mice

Figure 3B. Anterior cortex

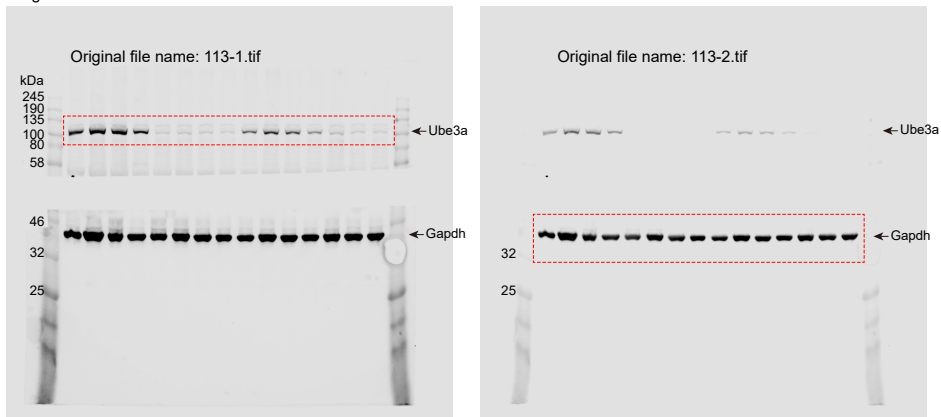

Figure 3B. Hippocampus

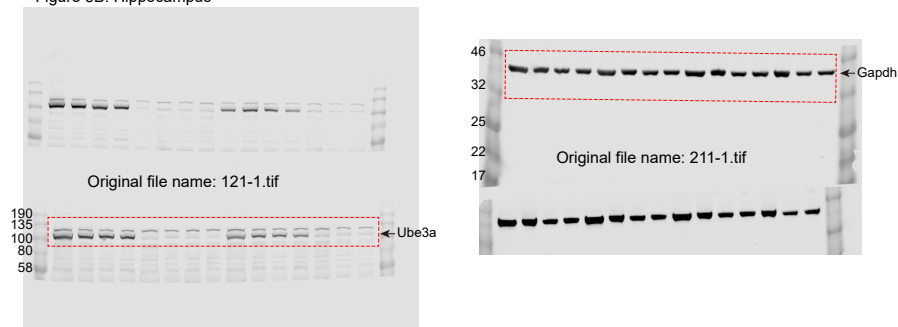

Supplement: fig3-data1 [file elife-81892-fig3-data1-v2.zip]
