# Supplementary material for: Antisense oligonucleotide therapy rescues disturbed brain rhythms and sleep in juvenile and adult mouse models of Angelman syndrome
Source: eLife journal article supplement (doi:10.7554/elife.81892), 2023-01-03

3 weeks post ASO injection to adult mice

Figure 3C. Anterior cortex

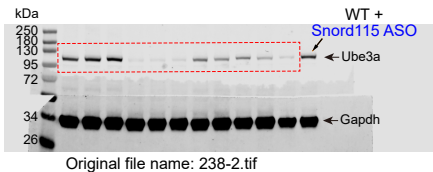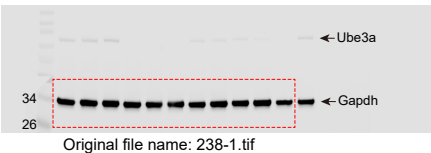

Figure 3C. Hippocampus

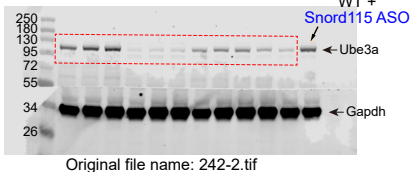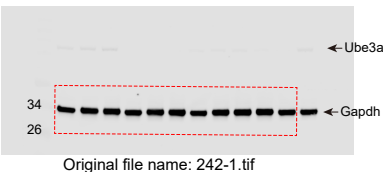

10 weeks post ASO injection to adult mice

Figure 3C. Anterior cortex

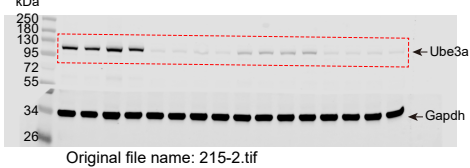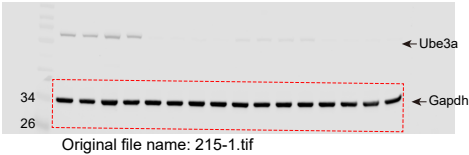

Figure 3C. Hippocampus

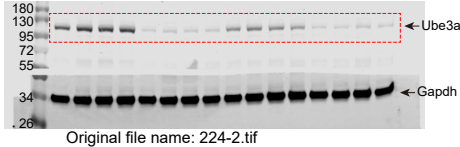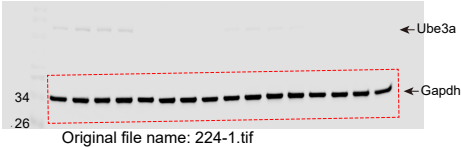

Supplement: fig3-data2 [file elife-81892-fig3-data2-v3.zip]
