# Supplementary material for: Antisense oligonucleotide therapy rescues disturbed brain rhythms and sleep in juvenile and adult mouse models of Angelman syndrome
Source: eLife journal article supplement (doi:10.7554/elife.81892), 2023-01-03

Figure 3-supplement 1A. Olfactory bulb

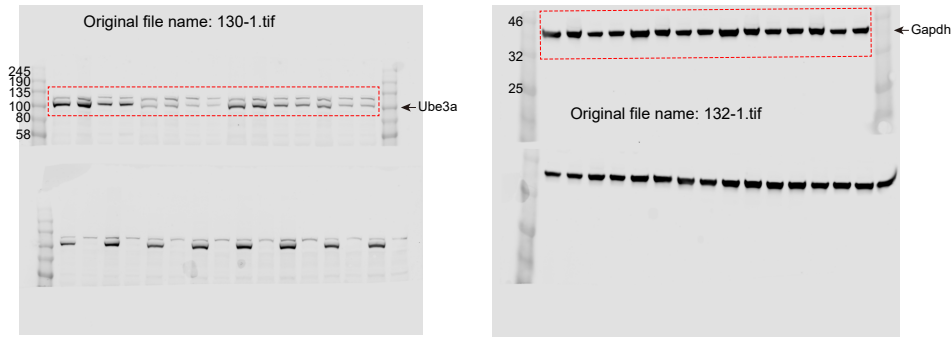

Figure 3-supplement 1A. Striatum

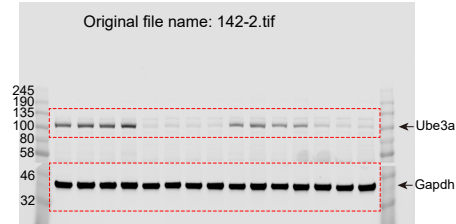

Figure 3-supplement 1A. Midbrain + Hindbrain

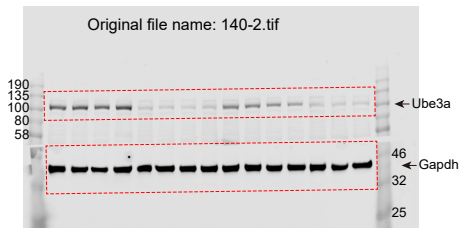

Supplement: fig3-figsupp1-data2 [file elife-81892-fig3-figsupp1-data2-v2.zip]
