# Supplementary material for: Antisense oligonucleotide therapy rescues disturbed brain rhythms and sleep in juvenile and adult mouse models of Angelman syndrome
Source: eLife journal article supplement (doi:10.7554/elife.81892), 2023-01-03

Figure 3-supplement 1B. Posterior cortex

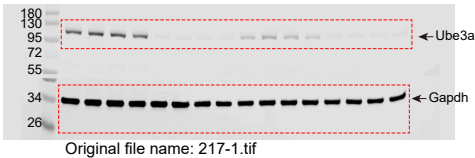

Figure 3-supplement 1B. Cerebellum

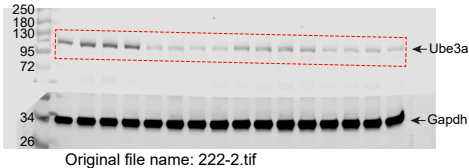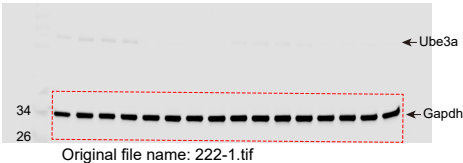

Figure 3-supplement 1B. Thalamus + Hypothalamus

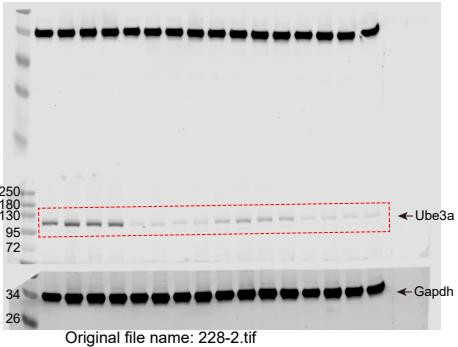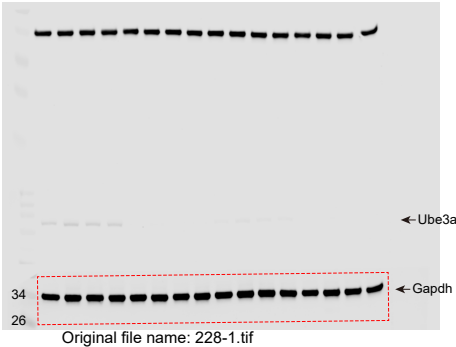

Supplement: fig3-figsupp1-data4 [file elife-81892-fig3-figsupp1-data4-v2.zip]
