# Supplementary material for: Antisense oligonucleotide therapy rescues disturbed brain rhythms and sleep in juvenile and adult mouse models of Angelman syndrome
Source: eLife. 2023 Jan 3;12:e81892. doi: 10.7554/eLife.81892 (PMC9904759; doi:10.7554/eLife.81892)
Supplement: Supplementary file 3. — The details of all statistical tests, numbers of replicates, and p values are presented for each experiment in the table. [file elife-81892-supp3.xlsx]

## Sheet: ddPCR
Figure	Experiment	Tissue sample	Primer sets (Forward, Reverse)	Statistical test	n (mouse): WT / Ube3amΔe5/p+ / Ube3amΔe5/pΔe5	P value (summary with genotype as source of variation)	Multiple comparison
							Genotype pair	P value
Fig 1C	ddPCR	Brain	exon4, exon5	Two-way ANOVA (Tukey multiple comparison)	4/5/3	<0.0001	WT vs. Ube3amΔe5/p+	<0.0001
							WT vs. Ube3amΔe5/pΔe5	<0.0001
							Ube3amΔe5/p+ vs. Ube3amΔe5/pΔe5	0.6468
			exon4, exon6				WT vs. Ube3amΔe5/p+	0.9963
							WT vs. Ube3amΔe5/pΔe5	0.1465
							Ube3amΔe5/p+ vs. Ube3amΔe5/pΔe5	0.1431
			exon5, exon6				WT vs. Ube3amΔe5/p+	<0.0001
							WT vs. Ube3amΔe5/pΔe5	<0.0001
							Ube3amΔe5/p+ vs. Ube3amΔe5/pΔe5	0.5628
			exon7, exon8				WT vs. Ube3amΔe5/p+	0.2397
							WT vs. Ube3amΔe5/pΔe5	0.8285
							Ube3amΔe5/p+ vs. Ube3amΔe5/pΔe5	0.6502
			exon11, exon12				WT vs. Ube3amΔe5/p+	0.7925
							WT vs. Ube3amΔe5/pΔe5	0.014
							Ube3amΔe5/p+ vs. Ube3amΔe5/pΔe5	0.0461
			exon12, exon13				WT vs. Ube3amΔe5/p+	0.2353
							WT vs. Ube3amΔe5/pΔe5	0.0239
							Ube3amΔe5/p+ vs. Ube3amΔe5/pΔe5	0.3933
			intron12, exon13				WT vs. Ube3amΔe5/p+	0.8827
							WT vs. Ube3amΔe5/pΔe5	0.1179
							Ube3amΔe5/p+ vs. Ube3amΔe5/pΔe5	0.2265
		Liver	exon4, exon5			<0.0001	WT vs. Ube3amΔe5/p+	0.0005
							WT vs. Ube3amΔe5/pΔe5	<0.0001
							Ube3amΔe5/p+ vs. Ube3amΔe5/pΔe5	0.0064
			exon4, exon6				WT vs. Ube3amΔe5/p+	0.3365
							WT vs. Ube3amΔe5/pΔe5	0.4955
							Ube3amΔe5/p+ vs. Ube3amΔe5/pΔe5	0.9925
			exon5, exon6				WT vs. Ube3amΔe5/p+	<0.0001
							WT vs. Ube3amΔe5/pΔe5	<0.0001
							Ube3amΔe5/p+ vs. Ube3amΔe5/pΔe5	0.001
			exon7, exon8				WT vs. Ube3amΔe5/p+	0.0447
							WT vs. Ube3amΔe5/pΔe5	0.0031
							Ube3amΔe5/p+ vs. Ube3amΔe5/pΔe5	0.3825
			exon11, exon12				WT vs. Ube3amΔe5/p+	0.0016
							WT vs. Ube3amΔe5/pΔe5	<0.0001
							Ube3amΔe5/p+ vs. Ube3amΔe5/pΔe5	0.0052
			exon12, exon13				WT vs. Ube3amΔe5/p+	0.0006
							WT vs. Ube3amΔe5/pΔe5	<0.0001
							Ube3amΔe5/p+ vs. Ube3amΔe5/pΔe5	0.0199
			intron12, exon13				WT vs. Ube3amΔe5/p+	0.959
							WT vs. Ube3amΔe5/pΔe5	0.9935
							Ube3amΔe5/p+ vs. Ube3amΔe5/pΔe5	0.9894
Figure	Experiment	Tissue sample	Primer sets (Forward, Reverse)	Statistical test	n (mouse): WT / Ube3amΔe6/p+	P value (summary with genotype as source of variation)	Multiple comparison
							Genotype pair	P value
Fig 1D	ddPCR	Brain	exon4, exon5	Two-way ANOVA (Šídák multiple comparison)	3/5	<0.0001	WT vs. Ube3amΔe6/p+	<0.0001
			exon4, exon6				WT vs. Ube3amΔe6/p+	0.0005
			exon5, exon6				WT vs. Ube3amΔe6/p+	<0.0001
			exon7, exon8				WT vs. Ube3amΔe6/p+	<0.0001
			exon11, exon12				WT vs. Ube3amΔe6/p+	<0.0001
			exon12, exon13				WT vs. Ube3amΔe6/p+	<0.0001
			intron12, exon13				WT vs. Ube3amΔe6/p+	0.9979
		Liver	exon4, exon5			0.0001	WT vs. Ube3amΔe6/p+	0.8855
			exon4, exon6				WT vs. Ube3amΔe6/p+	0.9899
			exon5, exon6				WT vs. Ube3amΔe6/p+	0.0666
			exon7, exon8				WT vs. Ube3amΔe6/p+	0.8295
			exon11, exon12				WT vs. Ube3amΔe6/p+	0.0258
			exon12, exon13				WT vs. Ube3amΔe6/p+	0.2666
			intron12, exon13				WT vs. Ube3amΔe6/p+	>0.9999

## Sheet: Ube3a-YFP
Figure	Experiment	ASO injection age	Timepoints after ASO injection	Brain region	Statistical test	n (mouse): Ube3amYFP/p+, Ube3am+/pYFP + Control ASO, Ube3am+/pYFP + Ube3a-as ASO, Ube3am+/pYFP + Snord115 ASO	P value (summary)	Multiple comparison
								Genotype pair	P value
Fig 2 S1C	Immunohistochemistry	3 months old	18 days post ASO injection	Anterior cortex	Nested One-way ANOVA (Turkey multiple comparison)	3/3/3/3	0.0234	Ube3amYFP/p+ vs. Ube3am+/pYFP+ Control ASO	0.023
								Ube3amYFP/p+ vs. Ube3am+/pYFP+ Snord115 ASO	0.0373
								Ube3amYFP/p+ vs. Ube3am+/pYFP+ Ube3a-as ASO	0.1049
								Ube3am+/pYFP+ Control ASO vs. Ube3am+/pYFP+ Snord115 ASO	0.8996
								Ube3am+/pYFP+ Control ASO vs. Ube3am+/pYFP+ Ube3a-as ASO	0.3391
								Ube3am+/pYFP+ Snord115 ASO vs. Ube3am+/pYFP+ Ube3a-as ASO	0.6254
Fig 2 S1C	Immunohistochemistry			Posterior cortex	Nested One-way ANOVA (Turkey multiple comparison)	3/3/3/3	0.0467	Ube3amYFP/p+ vs. Ube3am+/pYFP+ Control ASO	0.041
								Ube3amYFP/p+ vs. Ube3am+/pYFP+ Snord115 ASO	0.0936
								Ube3amYFP/p+ vs. Ube3am+/pYFP+ Ube3a-as ASO	0.2503
								Ube3am+/pYFP+ Control ASO vs. Ube3am+/pYFP+ Snord115 ASO	0.7538
								Ube3am+/pYFP+ Control ASO vs. Ube3am+/pYFP+ Ube3a-as ASO	0.3017
								Ube3am+/pYFP+ Snord115 ASO vs. Ube3am+/pYFP+ Ube3a-as ASO	0.7299
Fig 2 S1C	Immunohistochemistry			Cerebellum	Nested One-way ANOVA (Turkey multiple comparison)	3/3/3/3	0.1278	Ube3amYFP/p+ vs. Ube3am+/pYFP+ Control ASO	0.1076
								Ube3amYFP/p+ vs. Ube3am+/pYFP+ Snord115 ASO	0.5572
								Ube3amYFP/p+ vs. Ube3am+/pYFP+ Ube3a-as ASO	0.2878
								Ube3am+/pYFP+ Control ASO vs. Ube3am+/pYFP+ Snord115 ASO	0.4064
								Ube3am+/pYFP+ Control ASO vs. Ube3am+/pYFP+ Ube3a-as ASO	0.7366
								Ube3am+/pYFP+ Snord115 ASO vs. Ube3am+/pYFP+ Ube3a-as ASO	0.8881
Fig 2 S1C	Immunohistochemistry			Hippocampus (CA1)	Nested One-way ANOVA (Turkey multiple comparison)	3/3/3/3	0.0284	Ube3amYFP/p+ vs. Ube3am+/pYFP+ Control ASO	0.0212
								Ube3amYFP/p+ vs. Ube3am+/pYFP+ Snord115 ASO	0.1743
								Ube3amYFP/p+ vs. Ube3am+/pYFP+ Ube3a-as ASO	0.238
								Ube3am+/pYFP+ Control ASO vs. Ube3am+/pYFP+ Snord115 ASO	0.1772
								Ube3am+/pYFP+ Control ASO vs. Ube3am+/pYFP+ Ube3a-as ASO	0.1308
								Ube3am+/pYFP+ Snord115 ASO vs. Ube3am+/pYFP+ Ube3a-as ASO	0.9864
Fig 2 S1C	Immunohistochemistry			Thalamus	Nested One-way ANOVA (Turkey multiple comparison)	3/3/3/3	0.0649	Ube3amYFP/p+ vs. Ube3am+/pYFP+ Control ASO	0.0491
								Ube3amYFP/p+ vs. Ube3am+/pYFP+ Snord115 ASO	0.3082
								Ube3amYFP/p+ vs. Ube3am+/pYFP+ Ube3a-as ASO	0.291
								Ube3am+/pYFP+ Control ASO vs. Ube3am+/pYFP+ Snord115 ASO	0.3068
								Ube3am+/pYFP+ Control ASO vs. Ube3am+/pYFP+ Ube3a-as ASO	0.3248
								Ube3am+/pYFP+ Snord115 ASO vs. Ube3am+/pYFP+ Ube3a-as ASO	>0.9999
Fig 2 S1C	Immunohistochemistry			Olfactory bulb	Nested One-way ANOVA (Turkey multiple comparison)	2/3/3/2	0.1769	Ube3amYFP/p+ vs. Ube3am+/pYFP+ Control ASO	0.2453
								Ube3amYFP/p+ vs. Ube3am+/pYFP+ Snord115 ASO	0.5734
								Ube3amYFP/p+ vs. Ube3am+/pYFP+ Ube3a-as ASO	>0.9999
								Ube3am+/pYFP+ Control ASO vs. Ube3am+/pYFP+ Snord115 ASO	0.6986
								Ube3am+/pYFP+ Control ASO vs. Ube3am+/pYFP+ Ube3a-as ASO	0.1824
								Ube3am+/pYFP+ Snord115 ASO vs. Ube3am+/pYFP+ Ube3a-as ASO	0.4977
Fig 2 S1C	Immunohistochemistry			Striatum	Nested One-way ANOVA (Turkey multiple comparison)	3/3/3/3	0.0714	Ube3amYFP/p+ vs. Ube3am+/pYFP+ Control ASO	0.0624
								Ube3amYFP/p+ vs. Ube3am+/pYFP+ Snord115 ASO	0.7244
								Ube3amYFP/p+ vs. Ube3am+/pYFP+ Ube3a-as ASO	0.2746
								Ube3am+/pYFP+ Control ASO vs. Ube3am+/pYFP+ Snord115 ASO	0.1602
								Ube3am+/pYFP+ Control ASO vs. Ube3am+/pYFP+ Ube3a-as ASO	0.4558
								Ube3am+/pYFP+ Snord115 ASO vs. Ube3am+/pYFP+ Ube3a-as ASO	0.7106
Fig 2 S1C	Immunohistochemistry			Hindbrain	Nested One-way ANOVA (Turkey multiple comparison)	3/3/3/3	0.0002	Ube3amYFP/p+ vs. Ube3am+/pYFP+ Control ASO	0.0002
								Ube3amYFP/p+ vs. Ube3am+/pYFP+ Snord115 ASO	0.0006
								Ube3amYFP/p+ vs. Ube3am+/pYFP+ Ube3a-as ASO	0.0043
								Ube3am+/pYFP+ Control ASO vs. Ube3am+/pYFP+ Snord115 ASO	0.7616
								Ube3am+/pYFP+ Control ASO vs. Ube3am+/pYFP+ Ube3a-as ASO	0.0956
								Ube3am+/pYFP+ Snord115 ASO vs. Ube3am+/pYFP+ Ube3a-as ASO	0.3575

## Sheet: Western blot
Figure	Experiment	ASO injection age	Timepoints post ASO injection	Brain region	Statistical test	n (mouse): WT + control ASO / Ube3amΔe6/p+ + control ASO / Ube3amΔe6/p+ + Ube3a-as ASO / Ube3amΔe6/p+ + Snord115 ASO	P value (summary)	Multiple comparison
								Genotype pair	P value
Fig 3D	Western blot	Juvenile	3 weeks post ASO injection (p3wks)	Anterior cortex	One-way ANOVA (Tukey multiple comparison)	8/6/5/5	<0.0001	WT + control ASO vs. Ube3amΔe6/p+ + control ASO	<0.0001
								WT + control ASO vs. Ube3amΔe6/p+ + Ube3a-as ASO	<0.0001
								WT + control ASO vs. Ube3amΔe6/p+ + Snord115 ASO	<0.0001
								Ube3amΔe6/p+ + control ASO vs. Ube3amΔe6/p+ + Ube3a-as ASO	0.0063
								Ube3amΔe6/p+ + control ASO vs. Ube3amΔe6/p+ + Snord115 ASO	0.0051
								Ube3amΔe6/p+ + Ube3a-as ASO vs. Ube3amΔe6/p+ + Snord115 ASO	0.9997
	Western blot		6 weeks post ASO injection (p6wks)		One-way ANOVA (Tukey multiple comparison)	7/5/5/5	<0.0001	WT + control ASO vs. Ube3amΔe6/p+ + control ASO	<0.0001
								WT + control ASO vs. Ube3amΔe6/p+ + Ube3a-as ASO	<0.0001
								WT + control ASO vs. Ube3amΔe6/p+ + Snord115 ASO	<0.0001
								Ube3amΔe6/p+ + control ASO vs. Ube3amΔe6/p+ + Ube3a-as ASO	<0.0001
								Ube3amΔe6/p+ + control ASO vs. Ube3amΔe6/p+ + Snord115 ASO	0.9373
								Ube3amΔe6/p+ + Ube3a-as ASO vs. Ube3amΔe6/p+ + Snord115 ASO	<0.0001
	Western blot		10 weeks post ASO injection (p10wks)		One-way ANOVA (Tukey multiple comparison)	7/6/6/6	<0.0001	WT + control ASO vs. Ube3amΔe6/p+ + control ASO	<0.0001
								WT + control ASO vs. Ube3amΔe6/p+ + Ube3a-as ASO	<0.0001
								WT + control ASO vs. Ube3amΔe6/p+ + Snord115 ASO	<0.0001
								Ube3amΔe6/p+ + control ASO vs. Ube3amΔe6/p+ + Ube3a-as ASO	0.0038
								Ube3amΔe6/p+ + control ASO vs. Ube3amΔe6/p+ + Snord115 ASO	0.9998
								Ube3amΔe6/p+ + Ube3a-as ASO vs. Ube3amΔe6/p+ + Snord115 ASO	0.0032
Fig 3 S2	Western blot		3 weeks post ASO injection (p3wks)	Posterior cortex	One-way ANOVA (Tukey multiple comparison)	8/6/5/5	<0.0001	WT + control ASO vs. Ube3amΔe6/p+ + control ASO	<0.0001
								WT + control ASO vs. Ube3amΔe6/p+ + Ube3a-as ASO	0.0002
								WT + control ASO vs. Ube3amΔe6/p+ + Snord115 ASO	0.0003
								Ube3amΔe6/p+ + control ASO vs. Ube3amΔe6/p+ + Ube3a-as ASO	0.0011
								Ube3amΔe6/p+ + control ASO vs. Ube3amΔe6/p+ + Snord115 ASO	0.0009
								Ube3amΔe6/p+ + Ube3a-as ASO vs. Ube3amΔe6/p+ + Snord115 ASO	>0.9999
	Western blot		6 weeks post ASO injection (p6wks)		One-way ANOVA (Tukey multiple comparison)	7/5/5/5	<0.0001	WT + control ASO vs. Ube3amΔe6/p+ + control ASO	<0.0001
								WT + control ASO vs. Ube3amΔe6/p+ + Ube3a-as ASO	<0.0001
								WT + control ASO vs. Ube3amΔe6/p+ + Snord115 ASO	<0.0001
								Ube3amΔe6/p+ + control ASO vs. Ube3amΔe6/p+ + Ube3a-as ASO	<0.0001
								Ube3amΔe6/p+ + control ASO vs. Ube3amΔe6/p+ + Snord115 ASO	0.0076
								Ube3amΔe6/p+ + Ube3a-as ASO vs. Ube3amΔe6/p+ + Snord115 ASO	<0.0001
	Western blot		10 weeks post ASO injection (p10wks)		One-way ANOVA (Tukey multiple comparison)	7/6/6/6	<0.0001	WT + control ASO vs. Ube3amΔe6/p+ + control ASO	<0.0001
								WT + control ASO vs. Ube3amΔe6/p+ + Ube3a-as ASO	<0.0001
								WT + control ASO vs. Ube3amΔe6/p+ + Snord115 ASO	<0.0001
								Ube3amΔe6/p+ + control ASO vs. Ube3amΔe6/p+ + Ube3a-as ASO	<0.0001
								Ube3amΔe6/p+ + control ASO vs. Ube3amΔe6/p+ + Snord115 ASO	0.9997
								Ube3amΔe6/p+ + Ube3a-as ASO vs. Ube3amΔe6/p+ + Snord115 ASO	<0.0001
	Western blot		3 weeks post ASO injection (p3wks)	Cerebellum	One-way ANOVA (Tukey multiple comparison)	8/6/5/5	<0.0001	WT + control ASO vs. Ube3amΔe6/p+ + control ASO	<0.0001
								WT + control ASO vs. Ube3amΔe6/p+ + Ube3a-as ASO	<0.0001
								WT + control ASO vs. Ube3amΔe6/p+ + Snord115 ASO	<0.0001
								Ube3amΔe6/p+ + control ASO vs. Ube3amΔe6/p+ + Ube3a-as ASO	0.0118
								Ube3amΔe6/p+ + control ASO vs. Ube3amΔe6/p+ + Snord115 ASO	0.0151
								Ube3amΔe6/p+ + Ube3a-as ASO vs. Ube3amΔe6/p+ + Snord115 ASO	0.9995
	Western blot		6 weeks post ASO injection (p6wks)		One-way ANOVA (Tukey multiple comparison)	7/5/5/5	<0.0001	WT + control ASO vs. Ube3amΔe6/p+ + control ASO	<0.0001
								WT + control ASO vs. Ube3amΔe6/p+ + Ube3a-as ASO	<0.0001
								WT + control ASO vs. Ube3amΔe6/p+ + Snord115 ASO	<0.0001
								Ube3amΔe6/p+ + control ASO vs. Ube3amΔe6/p+ + Ube3a-as ASO	<0.0001
								Ube3amΔe6/p+ + control ASO vs. Ube3amΔe6/p+ + Snord115 ASO	0.0008
								Ube3amΔe6/p+ + Ube3a-as ASO vs. Ube3amΔe6/p+ + Snord115 ASO	0.489
	Western blot		10 weeks post ASO injection (p10wks)		One-way ANOVA (Tukey multiple comparison)	7/6/6/6	<0.0001	WT + control ASO vs. Ube3amΔe6/p+ + control ASO	<0.0001
								WT + control ASO vs. Ube3amΔe6/p+ + Ube3a-as ASO	<0.0001
								WT + control ASO vs. Ube3amΔe6/p+ + Snord115 ASO	<0.0001
								Ube3amΔe6/p+ + control ASO vs. Ube3amΔe6/p+ + Ube3a-as ASO	0.003
								Ube3amΔe6/p+ + control ASO vs. Ube3amΔe6/p+ + Snord115 ASO	0.8285
								Ube3amΔe6/p+ + Ube3a-as ASO vs. Ube3amΔe6/p+ + Snord115 ASO	0.0211
Fig 3D	Western blot		3 weeks post ASO injection (p3wks)	Hippocampus	One-way ANOVA (Tukey multiple comparison)	8/6/5/5	<0.0001	WT + control ASO vs. Ube3amΔe6/p+ + control ASO	<0.0001
								WT + control ASO vs. Ube3amΔe6/p+ + Ube3a-as ASO	0.0036
								WT + control ASO vs. Ube3amΔe6/p+ + Snord115 ASO	0.009
								Ube3amΔe6/p+ + control ASO vs. Ube3amΔe6/p+ + Ube3a-as ASO	0.0054
								Ube3amΔe6/p+ + control ASO vs. Ube3amΔe6/p+ + Snord115 ASO	0.0023
								Ube3amΔe6/p+ + Ube3a-as ASO vs. Ube3amΔe6/p+ + Snord115 ASO	0.9832
	Western blot		6 weeks post ASO injection (p6wks)		One-way ANOVA (Tukey multiple comparison)	7/5/5/5	<0.0001	WT + control ASO vs. Ube3amΔe6/p+ + control ASO	<0.0001
								WT + control ASO vs. Ube3amΔe6/p+ + Ube3a-as ASO	0.0099
								WT + control ASO vs. Ube3amΔe6/p+ + Snord115 ASO	<0.0001
								Ube3amΔe6/p+ + control ASO vs. Ube3amΔe6/p+ + Ube3a-as ASO	0.0025
								Ube3amΔe6/p+ + control ASO vs. Ube3amΔe6/p+ + Snord115 ASO	0.5048
								Ube3amΔe6/p+ + Ube3a-as ASO vs. Ube3amΔe6/p+ + Snord115 ASO	0.0496
	Western blot		10 weeks post ASO injection (p10wks)		One-way ANOVA (Tukey multiple comparison)	7/6/6/6	<0.0001	WT + control ASO vs. Ube3amΔe6/p+ + control ASO	<0.0001
								WT + control ASO vs. Ube3amΔe6/p+ + Ube3a-as ASO	<0.0001
								WT + control ASO vs. Ube3amΔe6/p+ + Snord115 ASO	<0.0001
								Ube3amΔe6/p+ + control ASO vs. Ube3amΔe6/p+ + Ube3a-as ASO	<0.0001
								Ube3amΔe6/p+ + control ASO vs. Ube3amΔe6/p+ + Snord115 ASO	0.9988
								Ube3amΔe6/p+ + Ube3a-as ASO vs. Ube3amΔe6/p+ + Snord115 ASO	<0.0001
Fig 3 S2	Western blot		3 weeks post ASO injection (p3wks)	Thalamus + Hypothalamus	One-way ANOVA (Tukey multiple comparison)	8/6/5/5	<0.0001	WT + control ASO vs. Ube3amΔe6/p+ + control ASO	<0.0001
								WT + control ASO vs. Ube3amΔe6/p+ + Ube3a-as ASO	<0.0001
								WT + control ASO vs. Ube3amΔe6/p+ + Snord115 ASO	<0.0001
								Ube3amΔe6/p+ + control ASO vs. Ube3amΔe6/p+ + Ube3a-as ASO	<0.0001
								Ube3amΔe6/p+ + control ASO vs. Ube3amΔe6/p+ + Snord115 ASO	0.0028
								Ube3amΔe6/p+ + Ube3a-as ASO vs. Ube3amΔe6/p+ + Snord115 ASO	0.1304
	Western blot		6 weeks post ASO injection (p6wks)		One-way ANOVA (Tukey multiple comparison)	7/5/5/5	<0.0001	WT + control ASO vs. Ube3amΔe6/p+ + control ASO	<0.0001
								WT + control ASO vs. Ube3amΔe6/p+ + Ube3a-as ASO	0.0003
								WT + control ASO vs. Ube3amΔe6/p+ + Snord115 ASO	<0.0001
								Ube3amΔe6/p+ + control ASO vs. Ube3amΔe6/p+ + Ube3a-as ASO	0.0122
								Ube3amΔe6/p+ + control ASO vs. Ube3amΔe6/p+ + Snord115 ASO	0.9665
								Ube3amΔe6/p+ + Ube3a-as ASO vs. Ube3amΔe6/p+ + Snord115 ASO	0.0319
	Western blot		10 weeks post ASO injection (p10wks)		One-way ANOVA (Tukey multiple comparison)	7/6/6/6	<0.0001	WT + control ASO vs. Ube3amΔe6/p+ + control ASO	<0.0001
								WT + control ASO vs. Ube3amΔe6/p+ + Ube3a-as ASO	<0.0001
								WT + control ASO vs. Ube3amΔe6/p+ + Snord115 ASO	<0.0001
								Ube3amΔe6/p+ + control ASO vs. Ube3amΔe6/p+ + Ube3a-as ASO	<0.0001
								Ube3amΔe6/p+ + control ASO vs. Ube3amΔe6/p+ + Snord115 ASO	0.9986
								Ube3amΔe6/p+ + Ube3a-as ASO vs. Ube3amΔe6/p+ + Snord115 ASO	<0.0001
	Western blot		3 weeks post ASO injection (p3wks)	Olfactory bulb	One-way ANOVA (Tukey multiple comparison)	8/6/5/5	<0.0001	WT + control ASO vs. Ube3amΔe6/p+ + control ASO	<0.0001
								WT + control ASO vs. Ube3amΔe6/p+ + Ube3a-as ASO	<0.0001
								WT + control ASO vs. Ube3amΔe6/p+ + Snord115 ASO	0.0015
								Ube3amΔe6/p+ + control ASO vs. Ube3amΔe6/p+ + Ube3a-as ASO	<0.0001
								Ube3amΔe6/p+ + control ASO vs. Ube3amΔe6/p+ + Snord115 ASO	<0.0001
								Ube3amΔe6/p+ + Ube3a-as ASO vs. Ube3amΔe6/p+ + Snord115 ASO	0.1158
	Western blot		6 weeks post ASO injection (p6wks)		One-way ANOVA (Tukey multiple comparison)	7/5/5/5	<0.0001	WT + control ASO vs. Ube3amΔe6/p+ + control ASO	<0.0001
								WT + control ASO vs. Ube3amΔe6/p+ + Ube3a-as ASO	<0.0001
								WT + control ASO vs. Ube3amΔe6/p+ + Snord115 ASO	<0.0001
								Ube3amΔe6/p+ + control ASO vs. Ube3amΔe6/p+ + Ube3a-as ASO	<0.0001
								Ube3amΔe6/p+ + control ASO vs. Ube3amΔe6/p+ + Snord115 ASO	0.0243
								Ube3amΔe6/p+ + Ube3a-as ASO vs. Ube3amΔe6/p+ + Snord115 ASO	0.0009
	Western blot		10 weeks post ASO injection (p10wks)		One-way ANOVA (Tukey multiple comparison)	7/6/6/6	<0.0001	WT + control ASO vs. Ube3amΔe6/p+ + control ASO	<0.0001
								WT + control ASO vs. Ube3amΔe6/p+ + Ube3a-as ASO	0.0003
								WT + control ASO vs. Ube3amΔe6/p+ + Snord115 ASO	<0.0001
								Ube3amΔe6/p+ + control ASO vs. Ube3amΔe6/p+ + Ube3a-as ASO	0.0006
								Ube3amΔe6/p+ + control ASO vs. Ube3amΔe6/p+ + Snord115 ASO	0.8003
								Ube3amΔe6/p+ + Ube3a-as ASO vs. Ube3amΔe6/p+ + Snord115 ASO	0.0047
	Western blot		3 weeks post ASO injection (p3wks)	Striatum	One-way ANOVA (Tukey multiple comparison)	8/6/5/5	<0.0001	WT + control ASO vs. Ube3amΔe6/p+ + control ASO	<0.0001
								WT + control ASO vs. Ube3amΔe6/p+ + Ube3a-as ASO	<0.0001
								WT + control ASO vs. Ube3amΔe6/p+ + Snord115 ASO	<0.0001
								Ube3amΔe6/p+ + control ASO vs. Ube3amΔe6/p+ + Ube3a-as ASO	0.0006
								Ube3amΔe6/p+ + control ASO vs. Ube3amΔe6/p+ + Snord115 ASO	0.0009
								Ube3amΔe6/p+ + Ube3a-as ASO vs. Ube3amΔe6/p+ + Snord115 ASO	0.9987
	Western blot		6 weeks post ASO injection (p6wks)		One-way ANOVA (Tukey multiple comparison)	7/5/5/5	<0.0001	WT + control ASO vs. Ube3amΔe6/p+ + control ASO	<0.0001
								WT + control ASO vs. Ube3amΔe6/p+ + Ube3a-as ASO	<0.0001
								WT + control ASO vs. Ube3amΔe6/p+ + Snord115 ASO	<0.0001
								Ube3amΔe6/p+ + control ASO vs. Ube3amΔe6/p+ + Ube3a-as ASO	<0.0001
								Ube3amΔe6/p+ + control ASO vs. Ube3amΔe6/p+ + Snord115 ASO	0.4837
								Ube3amΔe6/p+ + Ube3a-as ASO vs. Ube3amΔe6/p+ + Snord115 ASO	<0.0001
	Western blot		10 weeks post ASO injection (p10wks)		One-way ANOVA (Tukey multiple comparison)	7/6/6/6	<0.0001	WT + control ASO vs. Ube3amΔe6/p+ + control ASO	<0.0001
								WT + control ASO vs. Ube3amΔe6/p+ + Ube3a-as ASO	<0.0001
								WT + control ASO vs. Ube3amΔe6/p+ + Snord115 ASO	<0.0001
								Ube3amΔe6/p+ + control ASO vs. Ube3amΔe6/p+ + Ube3a-as ASO	<0.0001
								Ube3amΔe6/p+ + control ASO vs. Ube3amΔe6/p+ + Snord115 ASO	0.7103
								Ube3amΔe6/p+ + Ube3a-as ASO vs. Ube3amΔe6/p+ + Snord115 ASO	<0.0001
	Western blot		3 weeks post ASO injection (p3wks)	Midbrain + Hindbrain	One-way ANOVA (Tukey multiple comparison)	8/6/5/5	<0.0001	WT + control ASO vs. Ube3amΔe6/p+ + control ASO	<0.0001
								WT + control ASO vs. Ube3amΔe6/p+ + Ube3a-as ASO	<0.0001
								WT + control ASO vs. Ube3amΔe6/p+ + Snord115 ASO	<0.0001
								Ube3amΔe6/p+ + control ASO vs. Ube3amΔe6/p+ + Ube3a-as ASO	<0.0001
								Ube3amΔe6/p+ + control ASO vs. Ube3amΔe6/p+ + Snord115 ASO	0.0424
								Ube3amΔe6/p+ + Ube3a-as ASO vs. Ube3amΔe6/p+ + Snord115 ASO	<0.0001
	Western blot		6 weeks post ASO injection (p6wks)		One-way ANOVA (Tukey multiple comparison)	7/5/5/5	<0.0001	WT + control ASO vs. Ube3amΔe6/p+ + control ASO	<0.0001
								WT + control ASO vs. Ube3amΔe6/p+ + Ube3a-as ASO	0.0002
								WT + control ASO vs. Ube3amΔe6/p+ + Snord115 ASO	<0.0001
								Ube3amΔe6/p+ + control ASO vs. Ube3amΔe6/p+ + Ube3a-as ASO	0.0034
								Ube3amΔe6/p+ + control ASO vs. Ube3amΔe6/p+ + Snord115 ASO	0.7179
								Ube3amΔe6/p+ + Ube3a-as ASO vs. Ube3amΔe6/p+ + Snord115 ASO	0.0322
	Western blot		10 weeks post ASO injection (p10wks)		One-way ANOVA (Tukey multiple comparison)	7/6/6/6	<0.0001	WT + control ASO vs. Ube3amΔe6/p+ + control ASO	<0.0001
								WT + control ASO vs. Ube3amΔe6/p+ + Ube3a-as ASO	<0.0001
								WT + control ASO vs. Ube3amΔe6/p+ + Snord115 ASO	<0.0001
								Ube3amΔe6/p+ + control ASO vs. Ube3amΔe6/p+ + Ube3a-as ASO	<0.0001
								Ube3amΔe6/p+ + control ASO vs. Ube3amΔe6/p+ + Snord115 ASO	0.9757
								Ube3amΔe6/p+ + Ube3a-as ASO vs. Ube3amΔe6/p+ + Snord115 ASO	<0.0001
Fig 3D	Western blot	Adult	3 weeks post ASO injection (p3wks)	Anterior cortex	One-way ANOVA (Tukey multiple comparison)	7/9/8/6	<0.0001	WT + control ASO vs. Ube3amΔe6/p+ + control ASO	<0.0001
								WT + control ASO vs. Ube3amΔe6/p+ + Ube3a-as ASO	<0.0001
								WT + control ASO vs. Ube3amΔe6/p+ + Snord115 ASO	<0.0001
								Ube3amΔe6/p+ + control ASO vs. Ube3amΔe6/p+ + Ube3a-as ASO	<0.0001
								Ube3amΔe6/p+ + control ASO vs. Ube3amΔe6/p+ + Snord115 ASO	0.0082
								Ube3amΔe6/p+ + Ube3a-as ASO vs. Ube3amΔe6/p+ + Snord115 ASO	0.0155
	Western blot		6 weeks post ASO injection (p6wks)		One-way ANOVA (Tukey multiple comparison)	6/6/6/5	<0.0001	WT + control ASO vs. Ube3amΔe6/p+ + control ASO	<0.0001
								WT + control ASO vs. Ube3amΔe6/p+ + Ube3a-as ASO	<0.0001
								WT + control ASO vs. Ube3amΔe6/p+ + Snord115 ASO	<0.0001
								Ube3amΔe6/p+ + control ASO vs. Ube3amΔe6/p+ + Ube3a-as ASO	<0.0001
								Ube3amΔe6/p+ + control ASO vs. Ube3amΔe6/p+ + Snord115 ASO	0.999
								Ube3amΔe6/p+ + Ube3a-as ASO vs. Ube3amΔe6/p+ + Snord115 ASO	<0.0001
	Western blot		10 weeks post ASO injection (p10wks)		One-way ANOVA (Tukey multiple comparison)	7/7/7/7	<0.0001	WT + control ASO vs. Ube3amΔe6/p+ + control ASO	<0.0001
								WT + control ASO vs. Ube3amΔe6/p+ + Ube3a-as ASO	<0.0001
								WT + control ASO vs. Ube3amΔe6/p+ + Snord115 ASO	<0.0001
								Ube3amΔe6/p+ + control ASO vs. Ube3amΔe6/p+ + Ube3a-as ASO	0.0065
								Ube3amΔe6/p+ + control ASO vs. Ube3amΔe6/p+ + Snord115 ASO	0.9924
								Ube3amΔe6/p+ + Ube3a-as ASO vs. Ube3amΔe6/p+ + Snord115 ASO	0.0126
Fig 3 S2	Western blot		3 weeks post ASO injection (p3wks)	Posterior cortex	One-way ANOVA (Tukey multiple comparison)	7/9/8/6	<0.0001	WT + control ASO vs. Ube3amΔe6/p+ + control ASO	<0.0001
								WT + control ASO vs. Ube3amΔe6/p+ + Ube3a-as ASO	<0.0001
								WT + control ASO vs. Ube3amΔe6/p+ + Snord115 ASO	<0.0001
								Ube3amΔe6/p+ + control ASO vs. Ube3amΔe6/p+ + Ube3a-as ASO	<0.0001
								Ube3amΔe6/p+ + control ASO vs. Ube3amΔe6/p+ + Snord115 ASO	0.004
								Ube3amΔe6/p+ + Ube3a-as ASO vs. Ube3amΔe6/p+ + Snord115 ASO	0.0187
	Western blot		6 weeks post ASO injection (p6wks)		One-way ANOVA (Tukey multiple comparison)	6/6/6/5	<0.0001	WT + control ASO vs. Ube3amΔe6/p+ + control ASO	<0.0001
								WT + control ASO vs. Ube3amΔe6/p+ + Ube3a-as ASO	<0.0001
								WT + control ASO vs. Ube3amΔe6/p+ + Snord115 ASO	<0.0001
								Ube3amΔe6/p+ + control ASO vs. Ube3amΔe6/p+ + Ube3a-as ASO	<0.0001
								Ube3amΔe6/p+ + control ASO vs. Ube3amΔe6/p+ + Snord115 ASO	0.9949
								Ube3amΔe6/p+ + Ube3a-as ASO vs. Ube3amΔe6/p+ + Snord115 ASO	<0.0001
	Western blot		10 weeks post ASO injection (p10wks)		One-way ANOVA (Tukey multiple comparison)	7/7/7/7	<0.0001	WT + control ASO vs. Ube3amΔe6/p+ + control ASO	<0.0001
								WT + control ASO vs. Ube3amΔe6/p+ + Ube3a-as ASO	<0.0001
								WT + control ASO vs. Ube3amΔe6/p+ + Snord115 ASO	<0.0001
								Ube3amΔe6/p+ + control ASO vs. Ube3amΔe6/p+ + Ube3a-as ASO	0.0005
								Ube3amΔe6/p+ + control ASO vs. Ube3amΔe6/p+ + Snord115 ASO	0.9943
								Ube3amΔe6/p+ + Ube3a-as ASO vs. Ube3amΔe6/p+ + Snord115 ASO	0.001
	Western blot		3 weeks post ASO injection (p3wks)	Cerebellum	One-way ANOVA (Tukey multiple comparison)	7/9/8/6	<0.0001	WT + control ASO vs. Ube3amΔe6/p+ + control ASO	<0.0001
								WT + control ASO vs. Ube3amΔe6/p+ + Ube3a-as ASO	<0.0001
								WT + control ASO vs. Ube3amΔe6/p+ + Snord115 ASO	<0.0001
								Ube3amΔe6/p+ + control ASO vs. Ube3amΔe6/p+ + Ube3a-as ASO	0.0002
								Ube3amΔe6/p+ + control ASO vs. Ube3amΔe6/p+ + Snord115 ASO	0.0023
								Ube3amΔe6/p+ + Ube3a-as ASO vs. Ube3amΔe6/p+ + Snord115 ASO	0.9443
	Western blot		6 weeks post ASO injection (p6wks)		One-way ANOVA (Tukey multiple comparison)	6/6/6/5	<0.0001	WT + control ASO vs. Ube3amΔe6/p+ + control ASO	<0.0001
								WT + control ASO vs. Ube3amΔe6/p+ + Ube3a-as ASO	<0.0001
								WT + control ASO vs. Ube3amΔe6/p+ + Snord115 ASO	<0.0001
								Ube3amΔe6/p+ + control ASO vs. Ube3amΔe6/p+ + Ube3a-as ASO	<0.0001
								Ube3amΔe6/p+ + control ASO vs. Ube3amΔe6/p+ + Snord115 ASO	0.0472
								Ube3amΔe6/p+ + Ube3a-as ASO vs. Ube3amΔe6/p+ + Snord115 ASO	0.0059
	Western blot		10 weeks post ASO injection (p10wks)		One-way ANOVA (Tukey multiple comparison)	7/7/7/7	<0.0001	WT + control ASO vs. Ube3amΔe6/p+ + control ASO	<0.0001
								WT + control ASO vs. Ube3amΔe6/p+ + Ube3a-as ASO	<0.0001
								WT + control ASO vs. Ube3amΔe6/p+ + Snord115 ASO	<0.0001
								Ube3amΔe6/p+ + control ASO vs. Ube3amΔe6/p+ + Ube3a-as ASO	0.0224
								Ube3amΔe6/p+ + control ASO vs. Ube3amΔe6/p+ + Snord115 ASO	0.9004
								Ube3amΔe6/p+ + Ube3a-as ASO vs. Ube3amΔe6/p+ + Snord115 ASO	0.0973
Fig 3D	Western blot		3 weeks post ASO injection (p3wks)	Hippocampus	One-way ANOVA (Tukey multiple comparison)	7/9/8/6	<0.0001	WT + control ASO vs. Ube3amΔe6/p+ + control ASO	<0.0001
								WT + control ASO vs. Ube3amΔe6/p+ + Ube3a-as ASO	<0.0001
								WT + control ASO vs. Ube3amΔe6/p+ + Snord115 ASO	<0.0001
								Ube3amΔe6/p+ + control ASO vs. Ube3amΔe6/p+ + Ube3a-as ASO	<0.0001
								Ube3amΔe6/p+ + control ASO vs. Ube3amΔe6/p+ + Snord115 ASO	0.0047
								Ube3amΔe6/p+ + Ube3a-as ASO vs. Ube3amΔe6/p+ + Snord115 ASO	0.6029
	Western blot		6 weeks post ASO injection (p6wks)		One-way ANOVA (Tukey multiple comparison)	6/6/6/5	<0.0001	WT + control ASO vs. Ube3amΔe6/p+ + control ASO	<0.0001
								WT + control ASO vs. Ube3amΔe6/p+ + Ube3a-as ASO	<0.0001
								WT + control ASO vs. Ube3amΔe6/p+ + Snord115 ASO	<0.0001
								Ube3amΔe6/p+ + control ASO vs. Ube3amΔe6/p+ + Ube3a-as ASO	<0.0001
								Ube3amΔe6/p+ + control ASO vs. Ube3amΔe6/p+ + Snord115 ASO	0.9996
								Ube3amΔe6/p+ + Ube3a-as ASO vs. Ube3amΔe6/p+ + Snord115 ASO	<0.0001
	Western blot		10 weeks post ASO injection (p10wks)		One-way ANOVA (Tukey multiple comparison)	7/7/7/7	<0.0001	WT + control ASO vs. Ube3amΔe6/p+ + control ASO	<0.0001
								WT + control ASO vs. Ube3amΔe6/p+ + Ube3a-as ASO	<0.0001
								WT + control ASO vs. Ube3amΔe6/p+ + Snord115 ASO	<0.0001
								Ube3amΔe6/p+ + control ASO vs. Ube3amΔe6/p+ + Ube3a-as ASO	0.0005
								Ube3amΔe6/p+ + control ASO vs. Ube3amΔe6/p+ + Snord115 ASO	0.9936
								Ube3amΔe6/p+ + Ube3a-as ASO vs. Ube3amΔe6/p+ + Snord115 ASO	0.0009
Fig 3 S2	Western blot		3 weeks post ASO injection (p3wks)	Thalamus + Hypothalamus	One-way ANOVA (Tukey multiple comparison)	7/9/8/6	<0.0001	WT + control ASO vs. Ube3amΔe6/p+ + control ASO	<0.0001
								WT + control ASO vs. Ube3amΔe6/p+ + Ube3a-as ASO	<0.0001
								WT + control ASO vs. Ube3amΔe6/p+ + Snord115 ASO	<0.0001
								Ube3amΔe6/p+ + control ASO vs. Ube3amΔe6/p+ + Ube3a-as ASO	<0.0001
								Ube3amΔe6/p+ + control ASO vs. Ube3amΔe6/p+ + Snord115 ASO	0.0139
								Ube3amΔe6/p+ + Ube3a-as ASO vs. Ube3amΔe6/p+ + Snord115 ASO	0.0029
	Western blot		6 weeks post ASO injection (p6wks)		One-way ANOVA (Tukey multiple comparison)	6/6/6/5	<0.0001	WT + control ASO vs. Ube3amΔe6/p+ + control ASO	<0.0001
								WT + control ASO vs. Ube3amΔe6/p+ + Ube3a-as ASO	<0.0001
								WT + control ASO vs. Ube3amΔe6/p+ + Snord115 ASO	<0.0001
								Ube3amΔe6/p+ + control ASO vs. Ube3amΔe6/p+ + Ube3a-as ASO	<0.0001
								Ube3amΔe6/p+ + control ASO vs. Ube3amΔe6/p+ + Snord115 ASO	0.9663
								Ube3amΔe6/p+ + Ube3a-as ASO vs. Ube3amΔe6/p+ + Snord115 ASO	<0.0001
	Western blot		10 weeks post ASO injection (p10wks)		One-way ANOVA (Tukey multiple comparison)	7/7/7/7	<0.0001	WT + control ASO vs. Ube3amΔe6/p+ + control ASO	<0.0001
								WT + control ASO vs. Ube3amΔe6/p+ + Ube3a-as ASO	<0.0001
								WT + control ASO vs. Ube3amΔe6/p+ + Snord115 ASO	<0.0001
								Ube3amΔe6/p+ + control ASO vs. Ube3amΔe6/p+ + Ube3a-as ASO	0.0191
								Ube3amΔe6/p+ + control ASO vs. Ube3amΔe6/p+ + Snord115 ASO	0.9969
								Ube3amΔe6/p+ + Ube3a-as ASO vs. Ube3amΔe6/p+ + Snord115 ASO	0.0304
	Western blot		3 weeks post ASO injection (p3wks)	Olfactory bulb	One-way ANOVA (Tukey multiple comparison)	7/9/8/6	<0.0001	WT + control ASO vs. Ube3amΔe6/p+ + control ASO	<0.0001
								WT + control ASO vs. Ube3amΔe6/p+ + Ube3a-as ASO	<0.0001
								WT + control ASO vs. Ube3amΔe6/p+ + Snord115 ASO	<0.0001
								Ube3amΔe6/p+ + control ASO vs. Ube3amΔe6/p+ + Ube3a-as ASO	<0.0001
								Ube3amΔe6/p+ + control ASO vs. Ube3amΔe6/p+ + Snord115 ASO	0.0007
								Ube3amΔe6/p+ + Ube3a-as ASO vs. Ube3amΔe6/p+ + Snord115 ASO	0.4011
	Western blot		6 weeks post ASO injection (p6wks)		One-way ANOVA (Tukey multiple comparison)	6/6/6/5	<0.0001	WT + control ASO vs. Ube3amΔe6/p+ + control ASO	<0.0001
								WT + control ASO vs. Ube3amΔe6/p+ + Ube3a-as ASO	<0.0001
								WT + control ASO vs. Ube3amΔe6/p+ + Snord115 ASO	<0.0001
								Ube3amΔe6/p+ + control ASO vs. Ube3amΔe6/p+ + Ube3a-as ASO	<0.0001
								Ube3amΔe6/p+ + control ASO vs. Ube3amΔe6/p+ + Snord115 ASO	0.0084
								Ube3amΔe6/p+ + Ube3a-as ASO vs. Ube3amΔe6/p+ + Snord115 ASO	<0.0001
	Western blot		10 weeks post ASO injection (p10wks)		One-way ANOVA (Tukey multiple comparison)	7/7/7/7	<0.0001	WT + control ASO vs. Ube3amΔe6/p+ + control ASO	<0.0001
								WT + control ASO vs. Ube3amΔe6/p+ + Ube3a-as ASO	<0.0001
								WT + control ASO vs. Ube3amΔe6/p+ + Snord115 ASO	<0.0001
								Ube3amΔe6/p+ + control ASO vs. Ube3amΔe6/p+ + Ube3a-as ASO	0.0177
								Ube3amΔe6/p+ + control ASO vs. Ube3amΔe6/p+ + Snord115 ASO	0.7632
								Ube3amΔe6/p+ + Ube3a-as ASO vs. Ube3amΔe6/p+ + Snord115 ASO	0.139
	Western blot		3 weeks post ASO injection (p3wks)	Striatum	One-way ANOVA (Tukey multiple comparison)	7/9/8/6	<0.0001	WT + control ASO vs. Ube3amΔe6/p+ + control ASO	<0.0001
								WT + control ASO vs. Ube3amΔe6/p+ + Ube3a-as ASO	<0.0001
								WT + control ASO vs. Ube3amΔe6/p+ + Snord115 ASO	<0.0001
								Ube3amΔe6/p+ + control ASO vs. Ube3amΔe6/p+ + Ube3a-as ASO	0.0009
								Ube3amΔe6/p+ + control ASO vs. Ube3amΔe6/p+ + Snord115 ASO	0.0441
								Ube3amΔe6/p+ + Ube3a-as ASO vs. Ube3amΔe6/p+ + Snord115 ASO	0.6153
	Western blot		6 weeks post ASO injection (p6wks)		One-way ANOVA (Tukey multiple comparison)	6/6/6/5	<0.0001	WT + control ASO vs. Ube3amΔe6/p+ + control ASO	<0.0001
								WT + control ASO vs. Ube3amΔe6/p+ + Ube3a-as ASO	<0.0001
								WT + control ASO vs. Ube3amΔe6/p+ + Snord115 ASO	<0.0001
								Ube3amΔe6/p+ + control ASO vs. Ube3amΔe6/p+ + Ube3a-as ASO	0.0002
								Ube3amΔe6/p+ + control ASO vs. Ube3amΔe6/p+ + Snord115 ASO	0.9865
								Ube3amΔe6/p+ + Ube3a-as ASO vs. Ube3amΔe6/p+ + Snord115 ASO	0.0009
	Western blot		10 weeks post ASO injection (p10wks)		One-way ANOVA (Tukey multiple comparison)	7/7/7/7	<0.0001	WT + control ASO vs. Ube3amΔe6/p+ + control ASO	<0.0001
								WT + control ASO vs. Ube3amΔe6/p+ + Ube3a-as ASO	<0.0001
								WT + control ASO vs. Ube3amΔe6/p+ + Snord115 ASO	<0.0001
								Ube3amΔe6/p+ + control ASO vs. Ube3amΔe6/p+ + Ube3a-as ASO	0.0263
								Ube3amΔe6/p+ + control ASO vs. Ube3amΔe6/p+ + Snord115 ASO	0.9977
								Ube3amΔe6/p+ + Ube3a-as ASO vs. Ube3amΔe6/p+ + Snord115 ASO	0.0396
	Western blot		3 weeks post ASO injection (p3wks)	Midbrain + Hindbrain	One-way ANOVA (Tukey multiple comparison)	7/9/8/6	<0.0001	WT + control ASO vs. Ube3amΔe6/p+ + control ASO	<0.0001
								WT + control ASO vs. Ube3amΔe6/p+ + Ube3a-as ASO	<0.0001
								WT + control ASO vs. Ube3amΔe6/p+ + Snord115 ASO	<0.0001
								Ube3amΔe6/p+ + control ASO vs. Ube3amΔe6/p+ + Ube3a-as ASO	0.0011
								Ube3amΔe6/p+ + control ASO vs. Ube3amΔe6/p+ + Snord115 ASO	0.8296
								Ube3amΔe6/p+ + Ube3a-as ASO vs. Ube3amΔe6/p+ + Snord115 ASO	0.0245
	Western blot		6 weeks post ASO injection (p6wks)		One-way ANOVA (Tukey multiple comparison)	6/6/6/5	<0.0001	WT + control ASO vs. Ube3amΔe6/p+ + control ASO	<0.0001
								WT + control ASO vs. Ube3amΔe6/p+ + Ube3a-as ASO	<0.0001
								WT + control ASO vs. Ube3amΔe6/p+ + Snord115 ASO	<0.0001
								Ube3amΔe6/p+ + control ASO vs. Ube3amΔe6/p+ + Ube3a-as ASO	<0.0001
								Ube3amΔe6/p+ + control ASO vs. Ube3amΔe6/p+ + Snord115 ASO	0.5595
								Ube3amΔe6/p+ + Ube3a-as ASO vs. Ube3amΔe6/p+ + Snord115 ASO	<0.0001
	Western blot		10 weeks post ASO injection (p10wks)		One-way ANOVA (Tukey multiple comparison)	7/7/7/7	<0.0001	WT + control ASO vs. Ube3amΔe6/p+ + control ASO	<0.0001
								WT + control ASO vs. Ube3amΔe6/p+ + Ube3a-as ASO	<0.0001
								WT + control ASO vs. Ube3amΔe6/p+ + Snord115 ASO	<0.0001
								Ube3amΔe6/p+ + control ASO vs. Ube3amΔe6/p+ + Ube3a-as ASO	0.046
								Ube3amΔe6/p+ + control ASO vs. Ube3amΔe6/p+ + Snord115 ASO	0.854
								Ube3amΔe6/p+ + Ube3a-as ASO vs. Ube3amΔe6/p+ + Snord115 ASO	0.2165
Fig 3 S3	Western blot (Total Ube3a)	Juvenile	3 weeks post ASO injection (p3wks)	Anterior cortex	One-way ANOVA (Tukey multiple comparison)	4/4/4/4	<0.0001	WT + control ASO vs. Ube3amΔe6/p+ + control ASO	<0.0001
								WT + control ASO vs. Ube3amΔe6/p+ + Ube3a-as ASO	<0.0001
								WT + control ASO vs. Ube3amΔe6/p+ + Snord115 ASO	<0.0001
								Ube3amΔe6/p+ + control ASO vs. Ube3amΔe6/p+ + Ube3a-as ASO	<0.0001
								Ube3amΔe6/p+ + control ASO vs. Ube3amΔe6/p+ + Snord115 ASO	<0.0001
								Ube3amΔe6/p+ + Ube3a-as ASO vs. Ube3amΔe6/p+ + Snord115 ASO	0.0187
	Western blot (mUbe3a Isoform 3)				One-way ANOVA (Tukey multiple comparison)	4/4/4/4	<0.0001	WT + control ASO vs. Ube3amΔe6/p+ + control ASO	<0.0001
								WT + control ASO vs. Ube3amΔe6/p+ + Ube3a-as ASO	0.0002
								WT + control ASO vs. Ube3amΔe6/p+ + Snord115 ASO	<0.0001
								Ube3amΔe6/p+ + control ASO vs. Ube3amΔe6/p+ + Ube3a-as ASO	0.0011
								Ube3amΔe6/p+ + control ASO vs. Ube3amΔe6/p+ + Snord115 ASO	0.0314
								Ube3amΔe6/p+ + Ube3a-as ASO vs. Ube3amΔe6/p+ + Snord115 ASO	0.2494
	Western blot (mUbe3a Isoform 2)				One-way ANOVA (Tukey multiple comparison)	4/4/4/4	<0.0001	WT + control ASO vs. Ube3amΔe6/p+ + control ASO	<0.0001
								WT + control ASO vs. Ube3amΔe6/p+ + Ube3a-as ASO	0.0005
								WT + control ASO vs. Ube3amΔe6/p+ + Snord115 ASO	<0.0001
								Ube3amΔe6/p+ + control ASO vs. Ube3amΔe6/p+ + Ube3a-as ASO	0.0027
								Ube3amΔe6/p+ + control ASO vs. Ube3amΔe6/p+ + Snord115 ASO	0.0274
								Ube3amΔe6/p+ + Ube3a-as ASO vs. Ube3amΔe6/p+ + Snord115 ASO	0.5552
	Western blot (Total Ube3a)			Posterior cortex	One-way ANOVA (Tukey multiple comparison)	4/4/4/4	<0.0001	WT + control ASO vs. Ube3amΔe6/p+ + control ASO	<0.0001
								WT + control ASO vs. Ube3amΔe6/p+ + Ube3a-as ASO	0.0003
								WT + control ASO vs. Ube3amΔe6/p+ + Snord115 ASO	0.0001
								Ube3amΔe6/p+ + control ASO vs. Ube3amΔe6/p+ + Ube3a-as ASO	0.0021
								Ube3amΔe6/p+ + control ASO vs. Ube3amΔe6/p+ + Snord115 ASO	0.0071
								Ube3amΔe6/p+ + Ube3a-as ASO vs. Ube3amΔe6/p+ + Snord115 ASO	0.8912
	Western blot (mUbe3a Isoform 3)				One-way ANOVA (Tukey multiple comparison)	4/4/4/4	<0.0001	WT + control ASO vs. Ube3amΔe6/p+ + control ASO	<0.0001
								WT + control ASO vs. Ube3amΔe6/p+ + Ube3a-as ASO	0.0013
								WT + control ASO vs. Ube3amΔe6/p+ + Snord115 ASO	0.0002
								Ube3amΔe6/p+ + control ASO vs. Ube3amΔe6/p+ + Ube3a-as ASO	0.0018
								Ube3amΔe6/p+ + control ASO vs. Ube3amΔe6/p+ + Snord115 ASO	0.0122
								Ube3amΔe6/p+ + Ube3a-as ASO vs. Ube3amΔe6/p+ + Snord115 ASO	0.6766
	Western blot (mUbe3a Isoform 2)				One-way ANOVA (Tukey multiple comparison)	4/4/4/4	0.0001	WT + control ASO vs. Ube3amΔe6/p+ + control ASO	<0.0001
								WT + control ASO vs. Ube3amΔe6/p+ + Ube3a-as ASO	0.0016
								WT + control ASO vs. Ube3amΔe6/p+ + Snord115 ASO	0.0059
								Ube3amΔe6/p+ + control ASO vs. Ube3amΔe6/p+ + Ube3a-as ASO	0.2219
								Ube3amΔe6/p+ + control ASO vs. Ube3amΔe6/p+ + Snord115 ASO	0.0635
								Ube3amΔe6/p+ + Ube3a-as ASO vs. Ube3amΔe6/p+ + Snord115 ASO	0.865
	Western blot (Total Ube3a)			Cerebellum	One-way ANOVA (Tukey multiple comparison)	4/4/4/4	<0.0001	WT + control ASO vs. Ube3amΔe6/p+ + control ASO	<0.0001
								WT + control ASO vs. Ube3amΔe6/p+ + Ube3a-as ASO	<0.0001
								WT + control ASO vs. Ube3amΔe6/p+ + Snord115 ASO	<0.0001
								Ube3amΔe6/p+ + control ASO vs. Ube3amΔe6/p+ + Ube3a-as ASO	<0.0001
								Ube3amΔe6/p+ + control ASO vs. Ube3amΔe6/p+ + Snord115 ASO	<0.0001
								Ube3amΔe6/p+ + Ube3a-as ASO vs. Ube3amΔe6/p+ + Snord115 ASO	0.323
	Western blot (mUbe3a Isoform 3)				One-way ANOVA (Tukey multiple comparison)	4/4/4/4	<0.0001	WT + control ASO vs. Ube3amΔe6/p+ + control ASO	<0.0001
								WT + control ASO vs. Ube3amΔe6/p+ + Ube3a-as ASO	<0.0001
								WT + control ASO vs. Ube3amΔe6/p+ + Snord115 ASO	<0.0001
								Ube3amΔe6/p+ + control ASO vs. Ube3amΔe6/p+ + Ube3a-as ASO	<0.0001
								Ube3amΔe6/p+ + control ASO vs. Ube3amΔe6/p+ + Snord115 ASO	0.0003
								Ube3amΔe6/p+ + Ube3a-as ASO vs. Ube3amΔe6/p+ + Snord115 ASO	0.5774
	Western blot (mUbe3a Isoform 2)				One-way ANOVA (Tukey multiple comparison)	4/4/4/4	<0.0001	WT + control ASO vs. Ube3amΔe6/p+ + control ASO	<0.0001
								WT + control ASO vs. Ube3amΔe6/p+ + Ube3a-as ASO	0.0014
								WT + control ASO vs. Ube3amΔe6/p+ + Snord115 ASO	<0.0001
								Ube3amΔe6/p+ + control ASO vs. Ube3amΔe6/p+ + Ube3a-as ASO	<0.0001
								Ube3amΔe6/p+ + control ASO vs. Ube3amΔe6/p+ + Snord115 ASO	0.001
								Ube3amΔe6/p+ + Ube3a-as ASO vs. Ube3amΔe6/p+ + Snord115 ASO	0.1456
	Western blot (Total Ube3a)			Hippocampus	One-way ANOVA (Tukey multiple comparison)	4/4/4/4	0.0001	WT + control ASO vs. Ube3amΔe6/p+ + control ASO	<0.0001
								WT + control ASO vs. Ube3amΔe6/p+ + Ube3a-as ASO	0.0064
								WT + control ASO vs. Ube3amΔe6/p+ + Snord115 ASO	0.0046
								Ube3amΔe6/p+ + control ASO vs. Ube3amΔe6/p+ + Ube3a-as ASO	0.0566
								Ube3amΔe6/p+ + control ASO vs. Ube3amΔe6/p+ + Snord115 ASO	0.0789
								Ube3amΔe6/p+ + Ube3a-as ASO vs. Ube3amΔe6/p+ + Snord115 ASO	0.9972
	Western blot (mUbe3a Isoform 3)				One-way ANOVA (Tukey multiple comparison)	4/4/4/4	0.0002	WT + control ASO vs. Ube3amΔe6/p+ + control ASO	<0.0001
								WT + control ASO vs. Ube3amΔe6/p+ + Ube3a-as ASO	0.0078
								WT + control ASO vs. Ube3amΔe6/p+ + Snord115 ASO	0.008
								Ube3amΔe6/p+ + control ASO vs. Ube3amΔe6/p+ + Ube3a-as ASO	0.0583
								Ube3amΔe6/p+ + control ASO vs. Ube3amΔe6/p+ + Snord115 ASO	0.0567
								Ube3amΔe6/p+ + Ube3a-as ASO vs. Ube3amΔe6/p+ + Snord115 ASO	>0.9999
	Western blot (mUbe3a Isoform 2)				One-way ANOVA (Tukey multiple comparison)	4/4/4/4	0.0004	WT + control ASO vs. Ube3amΔe6/p+ + control ASO	0.0002
								WT + control ASO vs. Ube3amΔe6/p+ + Ube3a-as ASO	0.0131
								WT + control ASO vs. Ube3amΔe6/p+ + Snord115 ASO	0.004
								Ube3amΔe6/p+ + control ASO vs. Ube3amΔe6/p+ + Ube3a-as ASO	0.1138
								Ube3amΔe6/p+ + control ASO vs. Ube3amΔe6/p+ + Snord115 ASO	0.32
								Ube3amΔe6/p+ + Ube3a-as ASO vs. Ube3amΔe6/p+ + Snord115 ASO	0.9019
	Western blot (Total Ube3a)			Thalamus + Hypothalamus	One-way ANOVA (Tukey multiple comparison)	4/4/4/4	<0.0001	WT + control ASO vs. Ube3amΔe6/p+ + control ASO	<0.0001
								WT + control ASO vs. Ube3amΔe6/p+ + Ube3a-as ASO	<0.0001
								WT + control ASO vs. Ube3amΔe6/p+ + Snord115 ASO	<0.0001
								Ube3amΔe6/p+ + control ASO vs. Ube3amΔe6/p+ + Ube3a-as ASO	0.0003
								Ube3amΔe6/p+ + control ASO vs. Ube3amΔe6/p+ + Snord115 ASO	0.0048
								Ube3amΔe6/p+ + Ube3a-as ASO vs. Ube3amΔe6/p+ + Snord115 ASO	0.3224
	Western blot (mUbe3a Isoform 3)				One-way ANOVA (Tukey multiple comparison)	4/4/4/4	<0.0001	WT + control ASO vs. Ube3amΔe6/p+ + control ASO	<0.0001
								WT + control ASO vs. Ube3amΔe6/p+ + Ube3a-as ASO	<0.0001
								WT + control ASO vs. Ube3amΔe6/p+ + Snord115 ASO	<0.0001
								Ube3amΔe6/p+ + control ASO vs. Ube3amΔe6/p+ + Ube3a-as ASO	0.0007
								Ube3amΔe6/p+ + control ASO vs. Ube3amΔe6/p+ + Snord115 ASO	0.0088
								Ube3amΔe6/p+ + Ube3a-as ASO vs. Ube3amΔe6/p+ + Snord115 ASO	0.4343
	Western blot (mUbe3a Isoform 2)				One-way ANOVA (Tukey multiple comparison)	4/4/4/4	<0.0001	WT + control ASO vs. Ube3amΔe6/p+ + control ASO	<0.0001
								WT + control ASO vs. Ube3amΔe6/p+ + Ube3a-as ASO	<0.0001
								WT + control ASO vs. Ube3amΔe6/p+ + Snord115 ASO	<0.0001
								Ube3amΔe6/p+ + control ASO vs. Ube3amΔe6/p+ + Ube3a-as ASO	0.0291
								Ube3amΔe6/p+ + control ASO vs. Ube3amΔe6/p+ + Snord115 ASO	0.1574
								Ube3amΔe6/p+ + Ube3a-as ASO vs. Ube3amΔe6/p+ + Snord115 ASO	0.7526
	Western blot (Total Ube3a)			Olfactory bulb	One-way ANOVA (Tukey multiple comparison)	4/4/4/4	<0.0001	WT + control ASO vs. Ube3amΔe6/p+ + control ASO	<0.0001
								WT + control ASO vs. Ube3amΔe6/p+ + Ube3a-as ASO	<0.0001
								WT + control ASO vs. Ube3amΔe6/p+ + Snord115 ASO	<0.0001
								Ube3amΔe6/p+ + control ASO vs. Ube3amΔe6/p+ + Ube3a-as ASO	<0.0001
								Ube3amΔe6/p+ + control ASO vs. Ube3amΔe6/p+ + Snord115 ASO	0.0003
								Ube3amΔe6/p+ + Ube3a-as ASO vs. Ube3amΔe6/p+ + Snord115 ASO	0.8215
	Western blot (mUbe3a Isoform 3)				One-way ANOVA (Tukey multiple comparison)	4/4/4/4	<0.0001	WT + control ASO vs. Ube3amΔe6/p+ + control ASO	<0.0001
								WT + control ASO vs. Ube3amΔe6/p+ + Ube3a-as ASO	0.0008
								WT + control ASO vs. Ube3amΔe6/p+ + Snord115 ASO	0.0002
								Ube3amΔe6/p+ + control ASO vs. Ube3amΔe6/p+ + Ube3a-as ASO	0.0005
								Ube3amΔe6/p+ + control ASO vs. Ube3amΔe6/p+ + Snord115 ASO	0.0023
								Ube3amΔe6/p+ + Ube3a-as ASO vs. Ube3amΔe6/p+ + Snord115 ASO	0.7539
	Western blot (mUbe3a Isoform 2)				One-way ANOVA (Tukey multiple comparison)	4/4/4/4	0.0002	WT + control ASO vs. Ube3amΔe6/p+ + control ASO	0.0001
								WT + control ASO vs. Ube3amΔe6/p+ + Ube3a-as ASO	0.0093
								WT + control ASO vs. Ube3amΔe6/p+ + Snord115 ASO	0.0139
								Ube3amΔe6/p+ + control ASO vs. Ube3amΔe6/p+ + Ube3a-as ASO	0.0776
								Ube3amΔe6/p+ + control ASO vs. Ube3amΔe6/p+ + Snord115 ASO	0.0524
								Ube3amΔe6/p+ + Ube3a-as ASO vs. Ube3amΔe6/p+ + Snord115 ASO	0.9954
	Western blot (Total Ube3a)			Striatum	One-way ANOVA (Tukey multiple comparison)	4/4/4/4	<0.0001	WT + control ASO vs. Ube3amΔe6/p+ + control ASO	<0.0001
								WT + control ASO vs. Ube3amΔe6/p+ + Ube3a-as ASO	<0.0001
								WT + control ASO vs. Ube3amΔe6/p+ + Snord115 ASO	<0.0001
								Ube3amΔe6/p+ + control ASO vs. Ube3amΔe6/p+ + Ube3a-as ASO	0.0002
								Ube3amΔe6/p+ + control ASO vs. Ube3amΔe6/p+ + Snord115 ASO	0.0024
								Ube3amΔe6/p+ + Ube3a-as ASO vs. Ube3amΔe6/p+ + Snord115 ASO	0.3441
	Western blot (mUbe3a Isoform 3)				One-way ANOVA (Tukey multiple comparison)	4/4/4/4	<0.0001	WT + control ASO vs. Ube3amΔe6/p+ + control ASO	<0.0001
								WT + control ASO vs. Ube3amΔe6/p+ + Ube3a-as ASO	0.0001
								WT + control ASO vs. Ube3amΔe6/p+ + Snord115 ASO	<0.0001
								Ube3amΔe6/p+ + control ASO vs. Ube3amΔe6/p+ + Ube3a-as ASO	0.0008
								Ube3amΔe6/p+ + control ASO vs. Ube3amΔe6/p+ + Snord115 ASO	0.0103
								Ube3amΔe6/p+ + Ube3a-as ASO vs. Ube3amΔe6/p+ + Snord115 ASO	0.4494
	Western blot (mUbe3a Isoform 2)				One-way ANOVA (Tukey multiple comparison)	4/4/4/4	<0.0001	WT + control ASO vs. Ube3amΔe6/p+ + control ASO	<0.0001
								WT + control ASO vs. Ube3amΔe6/p+ + Ube3a-as ASO	<0.0001
								WT + control ASO vs. Ube3amΔe6/p+ + Snord115 ASO	<0.0001
								Ube3amΔe6/p+ + control ASO vs. Ube3amΔe6/p+ + Ube3a-as ASO	0.0211
								Ube3amΔe6/p+ + control ASO vs. Ube3amΔe6/p+ + Snord115 ASO	0.0479
								Ube3amΔe6/p+ + Ube3a-as ASO vs. Ube3amΔe6/p+ + Snord115 ASO	0.964
	Western blot (Total Ube3a)			Midbrain + Hindbrain	One-way ANOVA (Tukey multiple comparison)	4/4/4/4	<0.0001	WT + control ASO vs. Ube3amΔe6/p+ + control ASO	<0.0001
								WT + control ASO vs. Ube3amΔe6/p+ + Ube3a-as ASO	<0.0001
								WT + control ASO vs. Ube3amΔe6/p+ + Snord115 ASO	<0.0001
								Ube3amΔe6/p+ + control ASO vs. Ube3amΔe6/p+ + Ube3a-as ASO	<0.0001
								Ube3amΔe6/p+ + control ASO vs. Ube3amΔe6/p+ + Snord115 ASO	<0.0001
								Ube3amΔe6/p+ + Ube3a-as ASO vs. Ube3amΔe6/p+ + Snord115 ASO	0.0001
	Western blot (mUbe3a Isoform 3)				One-way ANOVA (Tukey multiple comparison)	4/4/4/4	<0.0001	WT + control ASO vs. Ube3amΔe6/p+ + control ASO	<0.0001
								WT + control ASO vs. Ube3amΔe6/p+ + Ube3a-as ASO	<0.0001
								WT + control ASO vs. Ube3amΔe6/p+ + Snord115 ASO	<0.0001
								Ube3amΔe6/p+ + control ASO vs. Ube3amΔe6/p+ + Ube3a-as ASO	<0.0001
								Ube3amΔe6/p+ + control ASO vs. Ube3amΔe6/p+ + Snord115 ASO	<0.0001
								Ube3amΔe6/p+ + Ube3a-as ASO vs. Ube3amΔe6/p+ + Snord115 ASO	0.0034
	Western blot (mUbe3a Isoform 2)				One-way ANOVA (Tukey multiple comparison)	4/4/4/4	<0.0001	WT + control ASO vs. Ube3amΔe6/p+ + control ASO	<0.0001
								WT + control ASO vs. Ube3amΔe6/p+ + Ube3a-as ASO	<0.0001
								WT + control ASO vs. Ube3amΔe6/p+ + Snord115 ASO	<0.0001
								Ube3amΔe6/p+ + control ASO vs. Ube3amΔe6/p+ + Ube3a-as ASO	0.0004
								Ube3amΔe6/p+ + control ASO vs. Ube3amΔe6/p+ + Snord115 ASO	0.4503
								Ube3amΔe6/p+ + Ube3a-as ASO vs. Ube3amΔe6/p+ + Snord115 ASO	0.0048
Fig 3 S4	Western blot (Total Ube3a)	Adult	3 weeks post ASO injection (p3wks)	Anterior cortex	One-way ANOVA (Tukey multiple comparison)	4/4/4/4	<0.0001	WT + control ASO vs. Ube3amΔe6/p+ + control ASO	<0.0001
								WT + control ASO vs. Ube3amΔe6/p+ + Ube3a-as ASO	<0.0001
								WT + control ASO vs. Ube3amΔe6/p+ + Snord115 ASO	<0.0001
								Ube3amΔe6/p+ + control ASO vs. Ube3amΔe6/p+ + Ube3a-as ASO	0.0264
								Ube3amΔe6/p+ + control ASO vs. Ube3amΔe6/p+ + Snord115 ASO	0.1738
								Ube3amΔe6/p+ + Ube3a-as ASO vs. Ube3amΔe6/p+ + Snord115 ASO	0.6849
	Western blot (mUbe3a Isoform 3)				One-way ANOVA (Tukey multiple comparison)	4/4/4/4	<0.0001	WT + control ASO vs. Ube3amΔe6/p+ + control ASO	<0.0001
								WT + control ASO vs. Ube3amΔe6/p+ + Ube3a-as ASO	<0.0001
								WT + control ASO vs. Ube3amΔe6/p+ + Snord115 ASO	<0.0001
								Ube3amΔe6/p+ + control ASO vs. Ube3amΔe6/p+ + Ube3a-as ASO	0.0082
								Ube3amΔe6/p+ + control ASO vs. Ube3amΔe6/p+ + Snord115 ASO	0.1421
								Ube3amΔe6/p+ + Ube3a-as ASO vs. Ube3amΔe6/p+ + Snord115 ASO	0.3851
	Western blot (mUbe3a Isoform 2)				One-way ANOVA (Tukey multiple comparison)	4/4/4/4	0.0004	WT + control ASO vs. Ube3amΔe6/p+ + control ASO	0.0003
								WT + control ASO vs. Ube3amΔe6/p+ + Ube3a-as ASO	0.0032
								WT + control ASO vs. Ube3amΔe6/p+ + Snord115 ASO	0.0049
								Ube3amΔe6/p+ + control ASO vs. Ube3amΔe6/p+ + Ube3a-as ASO	0.4384
								Ube3amΔe6/p+ + control ASO vs. Ube3amΔe6/p+ + Snord115 ASO	0.3197
								Ube3amΔe6/p+ + Ube3a-as ASO vs. Ube3amΔe6/p+ + Snord115 ASO	0.9945
	Western blot (Total Ube3a)			Hippocampus	One-way ANOVA (Tukey multiple comparison)	4/4/4/4	0.0001	WT + control ASO vs. Ube3amΔe6/p+ + control ASO	<0.0001
								WT + control ASO vs. Ube3amΔe6/p+ + Ube3a-as ASO	0.01
								WT + control ASO vs. Ube3amΔe6/p+ + Snord115 ASO	0.0205
								Ube3amΔe6/p+ + control ASO vs. Ube3amΔe6/p+ + Ube3a-as ASO	0.0387
								Ube3amΔe6/p+ + control ASO vs. Ube3amΔe6/p+ + Snord115 ASO	0.0188
								Ube3amΔe6/p+ + Ube3a-as ASO vs. Ube3amΔe6/p+ + Snord115 ASO	0.9752
	Western blot (mUbe3a Isoform 3)				One-way ANOVA (Tukey multiple comparison)	4/4/4/4	<0.0001	WT + control ASO vs. Ube3amΔe6/p+ + control ASO	<0.0001
								WT + control ASO vs. Ube3amΔe6/p+ + Ube3a-as ASO	0.0102
								WT + control ASO vs. Ube3amΔe6/p+ + Snord115 ASO	0.0174
								Ube3amΔe6/p+ + control ASO vs. Ube3amΔe6/p+ + Ube3a-as ASO	0.0188
								Ube3amΔe6/p+ + control ASO vs. Ube3amΔe6/p+ + Snord115 ASO	0.011
								Ube3amΔe6/p+ + Ube3a-as ASO vs. Ube3amΔe6/p+ + Snord115 ASO	0.9895
	Western blot (mUbe3a Isoform 2)				One-way ANOVA (Tukey multiple comparison)	4/4/4/4	0.0009	WT + control ASO vs. Ube3amΔe6/p+ + control ASO	0.0005
								WT + control ASO vs. Ube3amΔe6/p+ + Ube3a-as ASO	0.0163
								WT + control ASO vs. Ube3amΔe6/p+ + Snord115 ASO	0.0507
								Ube3amΔe6/p+ + control ASO vs. Ube3amΔe6/p+ + Ube3a-as ASO	0.2213
								Ube3amΔe6/p+ + control ASO vs. Ube3amΔe6/p+ + Snord115 ASO	0.0782
								Ube3amΔe6/p+ + Ube3a-as ASO vs. Ube3amΔe6/p+ + Snord115 ASO	0.914

## Sheet: RT-qPCR ASOs WT mice
Figure	Experiment	ASO	ASO injection age	Timepoints after ASO injection	Tissue sample	Statistical test	n (mouse): WT + PBS / WT + Ube3a-as ASO or Snord115 ASO	P value
Fig 2 S1A	RT-qPCR (Ube3a-ATS)	Ube3a-as ASO	8 weeks old, Day 29 post the first injection	8 weeks post the first ASO injection	Cortex	Unpaired t-test	4/4	1e-06
					Spinal cord		4/4	0.000202
	RT-qPCR (Ube3a)				Cortex		4/4	6e-05
					Spinal cord		4/4	0.000979
Fig 2 S1B	RT-qPCR (Ipw)	Snord115 ASO			Cortex		4/4	<0.000001
					Spinal cord		4/4	<0.000001
	RT-qPCR (Ube3a)				Cortex		4/4	0.008089
					Spinal cord		4/4	0.000423

## Sheet: RT-qPCR Ube3a-ATS
Figure	Experiment	ASO injection age	Timepoints after ASO injection	Brain region	Statistical test	n (mouse): WT + control ASO / Ube3amΔe6/p+ + control ASO / Ube3amΔe6/p+ + Ube3a-as ASO / Ube3amΔe6/p+ + Snord115 ASO	P value (summary)	Multiple comparison
								Genotype pair	P value
Fig 4A	RT-qPCR (Ube3a-ATS)	Juvenile	3 weeks post ASO injection (p3wks)	Anterior cortex	One-way ANOVA (Tukey multiple comparison)	2/2/2/2	0.0027	WT + control ASO vs. Ube3amΔe6/p+ + control ASO	0.9888
								WT + control ASO vs. Ube3amΔe6/p+ + Ube3a-as ASO	0.0045
								WT + control ASO vs. Ube3amΔe6/p+ + Snord115 ASO	0.0202
								Ube3amΔe6/p+ + control ASO vs. Ube3amΔe6/p+ + Ube3a-as ASO	0.0039
								Ube3amΔe6/p+ + control ASO vs. Ube3amΔe6/p+ + Snord115 ASO	0.0166
								Ube3amΔe6/p+ + Ube3a-as ASO vs. Ube3amΔe6/p+ + Snord115 ASO	0.1633
	RT-qPCR (Ube3a-ATS)		6 weeks post ASO injection (p6wks)		One-way ANOVA (Tukey multiple comparison)	2/2/2/3	0.0002	WT + control ASO vs. Ube3amΔe6/p+ + control ASO	0.4435
								WT + control ASO vs. Ube3amΔe6/p+ + Ube3a-as ASO	0.0003
								WT + control ASO vs. Ube3amΔe6/p+ + Snord115 ASO	0.0575
								Ube3amΔe6/p+ + control ASO vs. Ube3amΔe6/p+ + Ube3a-as ASO	0.0002
								Ube3amΔe6/p+ + control ASO vs. Ube3amΔe6/p+ + Snord115 ASO	0.0116
								Ube3amΔe6/p+ + Ube3a-as ASO vs. Ube3amΔe6/p+ + Snord115 ASO	0.0009
	RT-qPCR (Ube3a-ATS)		10 weeks post ASO injection (p10wks)		One-way ANOVA (Tukey multiple comparison)	4/5/5/4	<0.0001	WT + control ASO vs. Ube3amΔe6/p+ + control ASO	0.9951
								WT + control ASO vs. Ube3amΔe6/p+ + Ube3a-as ASO	<0.0001
								WT + control ASO vs. Ube3amΔe6/p+ + Snord115 ASO	0.0658
								Ube3amΔe6/p+ + control ASO vs. Ube3amΔe6/p+ + Ube3a-as ASO	<0.0001
								Ube3amΔe6/p+ + control ASO vs. Ube3amΔe6/p+ + Snord115 ASO	0.077
								Ube3amΔe6/p+ + Ube3a-as ASO vs. Ube3amΔe6/p+ + Snord115 ASO	<0.0001
Fig 4 S1A	RT-qPCR (Ube3a-ATS)		3 weeks post ASO injection (p3wks)	Posterior cortex	One-way ANOVA (Tukey multiple comparison)	2/2/2/2	0.0032	WT + control ASO vs. Ube3amΔe6/p+ + control ASO	0.987
								WT + control ASO vs. Ube3amΔe6/p+ + Ube3a-as ASO	0.0052
								WT + control ASO vs. Ube3amΔe6/p+ + Snord115 ASO	0.0253
								Ube3amΔe6/p+ + control ASO vs. Ube3amΔe6/p+ + Ube3a-as ASO	0.0045
								Ube3amΔe6/p+ + control ASO vs. Ube3amΔe6/p+ + Snord115 ASO	0.0204
								Ube3amΔe6/p+ + Ube3a-as ASO vs. Ube3amΔe6/p+ + Snord115 ASO	0.1584
	RT-qPCR (Ube3a-ATS)		6 weeks post ASO injection (p6wks)		One-way ANOVA (Tukey multiple comparison)	2/2/2/3	0.0004	WT + control ASO vs. Ube3amΔe6/p+ + control ASO	0.9071
								WT + control ASO vs. Ube3amΔe6/p+ + Ube3a-as ASO	0.0006
								WT + control ASO vs. Ube3amΔe6/p+ + Snord115 ASO	0.0891
								Ube3amΔe6/p+ + control ASO vs. Ube3amΔe6/p+ + Ube3a-as ASO	0.0005
								Ube3amΔe6/p+ + control ASO vs. Ube3amΔe6/p+ + Snord115 ASO	0.0428
								Ube3amΔe6/p+ + Ube3a-as ASO vs. Ube3amΔe6/p+ + Snord115 ASO	0.002
	RT-qPCR (Ube3a-ATS)		10 weeks post ASO injection (p10wks)		One-way ANOVA (Tukey multiple comparison)	4/5/5/4	<0.0001	WT + control ASO vs. Ube3amΔe6/p+ + control ASO	0.9739
								WT + control ASO vs. Ube3amΔe6/p+ + Ube3a-as ASO	<0.0001
								WT + control ASO vs. Ube3amΔe6/p+ + Snord115 ASO	0.0414
								Ube3amΔe6/p+ + control ASO vs. Ube3amΔe6/p+ + Ube3a-as ASO	<0.0001
								Ube3amΔe6/p+ + control ASO vs. Ube3amΔe6/p+ + Snord115 ASO	0.0664
								Ube3amΔe6/p+ + Ube3a-as ASO vs. Ube3amΔe6/p+ + Snord115 ASO	<0.0001
Fig 4 S1B	RT-qPCR (Ube3a-ATS)		3 weeks post ASO injection (p3wks)	Cerebellum	One-way ANOVA (Tukey multiple comparison)	2/2/2/2	0.0391	WT + control ASO vs. Ube3amΔe6/p+ + control ASO	0.7532
								WT + control ASO vs. Ube3amΔe6/p+ + Ube3a-as ASO	0.1509
								WT + control ASO vs. Ube3amΔe6/p+ + Snord115 ASO	0.1464
								Ube3amΔe6/p+ + control ASO vs. Ube3amΔe6/p+ + Ube3a-as ASO	0.0621
								Ube3amΔe6/p+ + control ASO vs. Ube3amΔe6/p+ + Snord115 ASO	0.0604
								Ube3amΔe6/p+ + Ube3a-as ASO vs. Ube3amΔe6/p+ + Snord115 ASO	>0.9999
	RT-qPCR (Ube3a-ATS)		6 weeks post ASO injection (p6wks)		One-way ANOVA (Tukey multiple comparison)	2/2/2/3	0.0544	WT + control ASO vs. Ube3amΔe6/p+ + control ASO	0.3217
								WT + control ASO vs. Ube3amΔe6/p+ + Ube3a-as ASO	0.3889
								WT + control ASO vs. Ube3amΔe6/p+ + Snord115 ASO	0.7609
								Ube3amΔe6/p+ + control ASO vs. Ube3amΔe6/p+ + Ube3a-as ASO	0.05
								Ube3amΔe6/p+ + control ASO vs. Ube3amΔe6/p+ + Snord115 ASO	0.0902
								Ube3amΔe6/p+ + Ube3a-as ASO vs. Ube3amΔe6/p+ + Snord115 ASO	0.7913
	RT-qPCR (Ube3a-ATS)		10 weeks post ASO injection (p10wks)		One-way ANOVA (Tukey multiple comparison)	4/5/5/4	<0.0001	WT + control ASO vs. Ube3amΔe6/p+ + control ASO	0.4046
								WT + control ASO vs. Ube3amΔe6/p+ + Ube3a-as ASO	<0.0001
								WT + control ASO vs. Ube3amΔe6/p+ + Snord115 ASO	0.0328
								Ube3amΔe6/p+ + control ASO vs. Ube3amΔe6/p+ + Ube3a-as ASO	<0.0001
								Ube3amΔe6/p+ + control ASO vs. Ube3amΔe6/p+ + Snord115 ASO	0.0012
								Ube3amΔe6/p+ + Ube3a-as ASO vs. Ube3amΔe6/p+ + Snord115 ASO	<0.0001
Fig 4B	RT-qPCR (Ube3a-ATS)		3 weeks post ASO injection (p3wks)	Hippocampus	One-way ANOVA (Tukey multiple comparison)	2/2/2/2	0.0033	WT + control ASO vs. Ube3amΔe6/p+ + control ASO	0.9965
								WT + control ASO vs. Ube3amΔe6/p+ + Ube3a-as ASO	0.0065
								WT + control ASO vs. Ube3amΔe6/p+ + Snord115 ASO	0.0154
								Ube3amΔe6/p+ + control ASO vs. Ube3amΔe6/p+ + Ube3a-as ASO	0.0059
								Ube3amΔe6/p+ + control ASO vs. Ube3amΔe6/p+ + Snord115 ASO	0.0136
								Ube3amΔe6/p+ + Ube3a-as ASO vs. Ube3amΔe6/p+ + Snord115 ASO	0.4972
	RT-qPCR (Ube3a-ATS)		6 weeks post ASO injection (p6wks)		One-way ANOVA (Tukey multiple comparison)	2/2/2/3	0.0068	WT + control ASO vs. Ube3amΔe6/p+ + control ASO	0.9961
								WT + control ASO vs. Ube3amΔe6/p+ + Ube3a-as ASO	0.0082
								WT + control ASO vs. Ube3amΔe6/p+ + Snord115 ASO	0.1589
								Ube3amΔe6/p+ + control ASO vs. Ube3amΔe6/p+ + Ube3a-as ASO	0.0097
								Ube3amΔe6/p+ + control ASO vs. Ube3amΔe6/p+ + Snord115 ASO	0.2053
								Ube3amΔe6/p+ + Ube3a-as ASO vs. Ube3amΔe6/p+ + Snord115 ASO	0.0477
	RT-qPCR (Ube3a-ATS)		10 weeks post ASO injection (p10wks)		One-way ANOVA (Tukey multiple comparison)	4/5/5/4	<0.0001	WT + control ASO vs. Ube3amΔe6/p+ + control ASO	0.3386
								WT + control ASO vs. Ube3amΔe6/p+ + Ube3a-as ASO	<0.0001
								WT + control ASO vs. Ube3amΔe6/p+ + Snord115 ASO	0.0016
								Ube3amΔe6/p+ + control ASO vs. Ube3amΔe6/p+ + Ube3a-as ASO	<0.0001
								Ube3amΔe6/p+ + control ASO vs. Ube3amΔe6/p+ + Snord115 ASO	0.0264
								Ube3amΔe6/p+ + Ube3a-as ASO vs. Ube3amΔe6/p+ + Snord115 ASO	<0.0001
Fig 4 S1C	RT-qPCR (Ube3a-ATS)		3 weeks post ASO injection (p3wks)	Thalamus + Hypothalamus	One-way ANOVA (Tukey multiple comparison)	2/2/2/2	0.0004	WT + control ASO vs. Ube3amΔe6/p+ + control ASO	0.9993
								WT + control ASO vs. Ube3amΔe6/p+ + Ube3a-as ASO	0.0008
								WT + control ASO vs. Ube3amΔe6/p+ + Snord115 ASO	0.0022
								Ube3amΔe6/p+ + control ASO vs. Ube3amΔe6/p+ + Ube3a-as ASO	0.0008
								Ube3amΔe6/p+ + control ASO vs. Ube3amΔe6/p+ + Snord115 ASO	0.0023
								Ube3amΔe6/p+ + Ube3a-as ASO vs. Ube3amΔe6/p+ + Snord115 ASO	0.1334
	RT-qPCR (Ube3a-ATS)		6 weeks post ASO injection (p6wks)		One-way ANOVA (Tukey multiple comparison)	2/2/2/3	0.0003	WT + control ASO vs. Ube3amΔe6/p+ + control ASO	0.308
								WT + control ASO vs. Ube3amΔe6/p+ + Ube3a-as ASO	0.0007
								WT + control ASO vs. Ube3amΔe6/p+ + Snord115 ASO	0.0615
								Ube3amΔe6/p+ + control ASO vs. Ube3amΔe6/p+ + Ube3a-as ASO	0.0003
								Ube3amΔe6/p+ + control ASO vs. Ube3amΔe6/p+ + Snord115 ASO	0.009
								Ube3amΔe6/p+ + Ube3a-as ASO vs. Ube3amΔe6/p+ + Snord115 ASO	0.0026
	RT-qPCR (Ube3a-ATS)		10 weeks post ASO injection (p10wks)		One-way ANOVA (Tukey multiple comparison)	4/5/5/4	<0.0001	WT + control ASO vs. Ube3amΔe6/p+ + control ASO	0.9645
								WT + control ASO vs. Ube3amΔe6/p+ + Ube3a-as ASO	<0.0001
								WT + control ASO vs. Ube3amΔe6/p+ + Snord115 ASO	0.2347
								Ube3amΔe6/p+ + control ASO vs. Ube3amΔe6/p+ + Ube3a-as ASO	<0.0001
								Ube3amΔe6/p+ + control ASO vs. Ube3amΔe6/p+ + Snord115 ASO	0.0905
								Ube3amΔe6/p+ + Ube3a-as ASO vs. Ube3amΔe6/p+ + Snord115 ASO	<0.0001
Fig 4 S1D	RT-qPCR (Ube3a-ATS)		3 weeks post ASO injection (p3wks)	Olfactory bulb	One-way ANOVA (Tukey multiple comparison)	2/2/2/2	<0.0001	WT + control ASO vs. Ube3amΔe6/p+ + control ASO	0.1423
								WT + control ASO vs. Ube3amΔe6/p+ + Ube3a-as ASO	0.0003
								WT + control ASO vs. Ube3amΔe6/p+ + Snord115 ASO	0.0007
								Ube3amΔe6/p+ + control ASO vs. Ube3amΔe6/p+ + Ube3a-as ASO	0.0002
								Ube3amΔe6/p+ + control ASO vs. Ube3amΔe6/p+ + Snord115 ASO	0.0003
								Ube3amΔe6/p+ + Ube3a-as ASO vs. Ube3amΔe6/p+ + Snord115 ASO	0.0792
	RT-qPCR (Ube3a-ATS)		6 weeks post ASO injection (p6wks)		One-way ANOVA (Tukey multiple comparison)	2/2/2/3	<0.0001	WT + control ASO vs. Ube3amΔe6/p+ + control ASO	0.0815
								WT + control ASO vs. Ube3amΔe6/p+ + Ube3a-as ASO	0.0001
								WT + control ASO vs. Ube3amΔe6/p+ + Snord115 ASO	0.0011
								Ube3amΔe6/p+ + control ASO vs. Ube3amΔe6/p+ + Ube3a-as ASO	<0.0001
								Ube3amΔe6/p+ + control ASO vs. Ube3amΔe6/p+ + Snord115 ASO	0.0002
								Ube3amΔe6/p+ + Ube3a-as ASO vs. Ube3amΔe6/p+ + Snord115 ASO	0.0037
	RT-qPCR (Ube3a-ATS)		10 weeks post ASO injection (p10wks)		One-way ANOVA (Tukey multiple comparison)	4/5/5/4	0.0004	WT + control ASO vs. Ube3amΔe6/p+ + control ASO	0.0657
								WT + control ASO vs. Ube3amΔe6/p+ + Ube3a-as ASO	0.0002
								WT + control ASO vs. Ube3amΔe6/p+ + Snord115 ASO	0.0495
								Ube3amΔe6/p+ + control ASO vs. Ube3amΔe6/p+ + Ube3a-as ASO	0.0206
								Ube3amΔe6/p+ + control ASO vs. Ube3amΔe6/p+ + Snord115 ASO	0.9889
								Ube3amΔe6/p+ + Ube3a-as ASO vs. Ube3amΔe6/p+ + Snord115 ASO	0.053
Fig 4 S1E	RT-qPCR (Ube3a-ATS)		3 weeks post ASO injection (p3wks)	Striatum	One-way ANOVA (Tukey multiple comparison)	2/2/2/2	0.0007	WT + control ASO vs. Ube3amΔe6/p+ + control ASO	0.1012
								WT + control ASO vs. Ube3amΔe6/p+ + Ube3a-as ASO	0.002
								WT + control ASO vs. Ube3amΔe6/p+ + Snord115 ASO	0.0208
								Ube3amΔe6/p+ + control ASO vs. Ube3amΔe6/p+ + Ube3a-as ASO	0.0007
								Ube3amΔe6/p+ + control ASO vs. Ube3amΔe6/p+ + Snord115 ASO	0.0036
								Ube3amΔe6/p+ + Ube3a-as ASO vs. Ube3amΔe6/p+ + Snord115 ASO	0.0312
	RT-qPCR (Ube3a-ATS)		6 weeks post ASO injection (p6wks)		One-way ANOVA (Tukey multiple comparison)	2/2/2/3	0.0012	WT + control ASO vs. Ube3amΔe6/p+ + control ASO	0.6913
								WT + control ASO vs. Ube3amΔe6/p+ + Ube3a-as ASO	0.0028
								WT + control ASO vs. Ube3amΔe6/p+ + Snord115 ASO	0.0324
								Ube3amΔe6/p+ + control ASO vs. Ube3amΔe6/p+ + Ube3a-as ASO	0.0014
								Ube3amΔe6/p+ + control ASO vs. Ube3amΔe6/p+ + Snord115 ASO	0.0112
								Ube3amΔe6/p+ + Ube3a-as ASO vs. Ube3amΔe6/p+ + Snord115 ASO	0.0401
	RT-qPCR (Ube3a-ATS)		10 weeks post ASO injection (p10wks)		One-way ANOVA (Tukey multiple comparison)	4/5/5/4	<0.0001	WT + control ASO vs. Ube3amΔe6/p+ + control ASO	0.447
								WT + control ASO vs. Ube3amΔe6/p+ + Ube3a-as ASO	<0.0001
								WT + control ASO vs. Ube3amΔe6/p+ + Snord115 ASO	0.5558
								Ube3amΔe6/p+ + control ASO vs. Ube3amΔe6/p+ + Ube3a-as ASO	<0.0001
								Ube3amΔe6/p+ + control ASO vs. Ube3amΔe6/p+ + Snord115 ASO	0.0471
								Ube3amΔe6/p+ + Ube3a-as ASO vs. Ube3amΔe6/p+ + Snord115 ASO	<0.0001
Fig 4 S1F	RT-qPCR (Ube3a-ATS)		3 weeks post ASO injection (p3wks)	Midbrain + Hindbrain	One-way ANOVA (Tukey multiple comparison)	2/2/2/2	<0.0001	WT + control ASO vs. Ube3amΔe6/p+ + control ASO	0.4533
								WT + control ASO vs. Ube3amΔe6/p+ + Ube3a-as ASO	0.0001
								WT + control ASO vs. Ube3amΔe6/p+ + Snord115 ASO	0.0009
								Ube3amΔe6/p+ + control ASO vs. Ube3amΔe6/p+ + Ube3a-as ASO	<0.0001
								Ube3amΔe6/p+ + control ASO vs. Ube3amΔe6/p+ + Snord115 ASO	0.0006
								Ube3amΔe6/p+ + Ube3a-as ASO vs. Ube3amΔe6/p+ + Snord115 ASO	0.002
	RT-qPCR (Ube3a-ATS)		6 weeks post ASO injection (p6wks)		One-way ANOVA (Tukey multiple comparison)	2/2/2/3	<0.0001	WT + control ASO vs. Ube3amΔe6/p+ + control ASO	0.155
								WT + control ASO vs. Ube3amΔe6/p+ + Ube3a-as ASO	<0.0001
								WT + control ASO vs. Ube3amΔe6/p+ + Snord115 ASO	0.0658
								Ube3amΔe6/p+ + control ASO vs. Ube3amΔe6/p+ + Ube3a-as ASO	<0.0001
								Ube3amΔe6/p+ + control ASO vs. Ube3amΔe6/p+ + Snord115 ASO	0.0057
								Ube3amΔe6/p+ + Ube3a-as ASO vs. Ube3amΔe6/p+ + Snord115 ASO	0.0001
	RT-qPCR (Ube3a-ATS)		10 weeks post ASO injection (p10wks)		One-way ANOVA (Tukey multiple comparison)	4/5/5/4	<0.0001	WT + control ASO vs. Ube3amΔe6/p+ + control ASO	0.042
								WT + control ASO vs. Ube3amΔe6/p+ + Ube3a-as ASO	<0.0001
								WT + control ASO vs. Ube3amΔe6/p+ + Snord115 ASO	<0.0001
								Ube3amΔe6/p+ + control ASO vs. Ube3amΔe6/p+ + Ube3a-as ASO	<0.0001
								Ube3amΔe6/p+ + control ASO vs. Ube3amΔe6/p+ + Snord115 ASO	0.0007
								Ube3amΔe6/p+ + Ube3a-as ASO vs. Ube3amΔe6/p+ + Snord115 ASO	<0.0001
Fig 4A	RT-qPCR (Ube3a-ATS)	Adult	3 weeks post ASO injection (p3wks)	Anterior cortex	One-way ANOVA (Tukey multiple comparison)	4/6/5/4	<0.0001	WT + control ASO vs. Ube3amΔe6/p+ + control ASO	0.8765
								WT + control ASO vs. Ube3amΔe6/p+ + Ube3a-as ASO	<0.0001
								WT + control ASO vs. Ube3amΔe6/p+ + Snord115 ASO	<0.0001
								Ube3amΔe6/p+ + control ASO vs. Ube3amΔe6/p+ + Ube3a-as ASO	<0.0001
								Ube3amΔe6/p+ + control ASO vs. Ube3amΔe6/p+ + Snord115 ASO	<0.0001
								Ube3amΔe6/p+ + Ube3a-as ASO vs. Ube3amΔe6/p+ + Snord115 ASO	0.0218
	RT-qPCR (Ube3a-ATS)		6 weeks post ASO injection (p6wks)		One-way ANOVA (Tukey multiple comparison)	6/6/6/5	<0.0001	WT + control ASO vs. Ube3amΔe6/p+ + control ASO	0.1442
								WT + control ASO vs. Ube3amΔe6/p+ + Ube3a-as ASO	<0.0001
								WT + control ASO vs. Ube3amΔe6/p+ + Snord115 ASO	0.2983
								Ube3amΔe6/p+ + control ASO vs. Ube3amΔe6/p+ + Ube3a-as ASO	<0.0001
								Ube3amΔe6/p+ + control ASO vs. Ube3amΔe6/p+ + Snord115 ASO	0.0042
								Ube3amΔe6/p+ + Ube3a-as ASO vs. Ube3amΔe6/p+ + Snord115 ASO	<0.0001
	RT-qPCR (Ube3a-ATS)		10 weeks post ASO injection (p10wks)		One-way ANOVA (Tukey multiple comparison)	3/3/3/3	0.0004	WT + control ASO vs. Ube3amΔe6/p+ + control ASO	0.9805
								WT + control ASO vs. Ube3amΔe6/p+ + Ube3a-as ASO	0.0008
								WT + control ASO vs. Ube3amΔe6/p+ + Snord115 ASO	0.998
								Ube3amΔe6/p+ + control ASO vs. Ube3amΔe6/p+ + Ube3a-as ASO	0.0013
								Ube3amΔe6/p+ + control ASO vs. Ube3amΔe6/p+ + Snord115 ASO	0.9967
								Ube3amΔe6/p+ + Ube3a-as ASO vs. Ube3amΔe6/p+ + Snord115 ASO	0.001
Fig 4 S1A	RT-qPCR (Ube3a-ATS)		3 weeks post ASO injection (p3wks)	Posterior cortex	One-way ANOVA (Tukey multiple comparison)	4/6/5/4	<0.0001	WT + control ASO vs. Ube3amΔe6/p+ + control ASO	0.4042
								WT + control ASO vs. Ube3amΔe6/p+ + Ube3a-as ASO	<0.0001
								WT + control ASO vs. Ube3amΔe6/p+ + Snord115 ASO	<0.0001
								Ube3amΔe6/p+ + control ASO vs. Ube3amΔe6/p+ + Ube3a-as ASO	<0.0001
								Ube3amΔe6/p+ + control ASO vs. Ube3amΔe6/p+ + Snord115 ASO	<0.0001
								Ube3amΔe6/p+ + Ube3a-as ASO vs. Ube3amΔe6/p+ + Snord115 ASO	0.0241
	RT-qPCR (Ube3a-ATS)		6 weeks post ASO injection (p6wks)		One-way ANOVA (Tukey multiple comparison)	6/6/6/5	<0.0001	WT + control ASO vs. Ube3amΔe6/p+ + control ASO	0.9813
								WT + control ASO vs. Ube3amΔe6/p+ + Ube3a-as ASO	<0.0001
								WT + control ASO vs. Ube3amΔe6/p+ + Snord115 ASO	0.0241
								Ube3amΔe6/p+ + control ASO vs. Ube3amΔe6/p+ + Ube3a-as ASO	<0.0001
								Ube3amΔe6/p+ + control ASO vs. Ube3amΔe6/p+ + Snord115 ASO	0.0506
								Ube3amΔe6/p+ + Ube3a-as ASO vs. Ube3amΔe6/p+ + Snord115 ASO	<0.0001
	RT-qPCR (Ube3a-ATS)		10 weeks post ASO injection (p10wks)		One-way ANOVA (Tukey multiple comparison)	3/3/3/3	<0.0001	WT + control ASO vs. Ube3amΔe6/p+ + control ASO	0.965
								WT + control ASO vs. Ube3amΔe6/p+ + Ube3a-as ASO	<0.0001
								WT + control ASO vs. Ube3amΔe6/p+ + Snord115 ASO	0.9103
								Ube3amΔe6/p+ + control ASO vs. Ube3amΔe6/p+ + Ube3a-as ASO	<0.0001
								Ube3amΔe6/p+ + control ASO vs. Ube3amΔe6/p+ + Snord115 ASO	0.9972
								Ube3amΔe6/p+ + Ube3a-as ASO vs. Ube3amΔe6/p+ + Snord115 ASO	<0.0001
Fig 4 S1B	RT-qPCR (Ube3a-ATS)		3 weeks post ASO injection (p3wks)	Cerebellum	One-way ANOVA (Tukey multiple comparison)	4/6/5/4	0.0063	WT + control ASO vs. Ube3amΔe6/p+ + control ASO	0.9835
								WT + control ASO vs. Ube3amΔe6/p+ + Ube3a-as ASO	0.3963
								WT + control ASO vs. Ube3amΔe6/p+ + Snord115 ASO	0.0239
								Ube3amΔe6/p+ + control ASO vs. Ube3amΔe6/p+ + Ube3a-as ASO	0.1735
								Ube3amΔe6/p+ + control ASO vs. Ube3amΔe6/p+ + Snord115 ASO	0.0064
								Ube3amΔe6/p+ + Ube3a-as ASO vs. Ube3amΔe6/p+ + Snord115 ASO	0.3013
	RT-qPCR (Ube3a-ATS)		6 weeks post ASO injection (p6wks)		One-way ANOVA (Tukey multiple comparison)	6/6/6/5	<0.0001	WT + control ASO vs. Ube3amΔe6/p+ + control ASO	>0.9999
								WT + control ASO vs. Ube3amΔe6/p+ + Ube3a-as ASO	<0.0001
								WT + control ASO vs. Ube3amΔe6/p+ + Snord115 ASO	0.0025
								Ube3amΔe6/p+ + control ASO vs. Ube3amΔe6/p+ + Ube3a-as ASO	<0.0001
								Ube3amΔe6/p+ + control ASO vs. Ube3amΔe6/p+ + Snord115 ASO	0.0023
								Ube3amΔe6/p+ + Ube3a-as ASO vs. Ube3amΔe6/p+ + Snord115 ASO	0.0048
	RT-qPCR (Ube3a-ATS)		10 weeks post ASO injection (p10wks)		One-way ANOVA (Tukey multiple comparison)	3/3/3/3	0.0041	WT + control ASO vs. Ube3amΔe6/p+ + control ASO	0.9994
								WT + control ASO vs. Ube3amΔe6/p+ + Ube3a-as ASO	0.0058
								WT + control ASO vs. Ube3amΔe6/p+ + Snord115 ASO	0.1796
								Ube3amΔe6/p+ + control ASO vs. Ube3amΔe6/p+ + Ube3a-as ASO	0.0067
								Ube3amΔe6/p+ + control ASO vs. Ube3amΔe6/p+ + Snord115 ASO	0.2103
								Ube3amΔe6/p+ + Ube3a-as ASO vs. Ube3amΔe6/p+ + Snord115 ASO	0.13
Fig 4B	RT-qPCR (Ube3a-ATS)		3 weeks post ASO injection (p3wks)	Hippocampus	One-way ANOVA (Tukey multiple comparison)	4/6/5/4	<0.0001	WT + control ASO vs. Ube3amΔe6/p+ + control ASO	0.9869
								WT + control ASO vs. Ube3amΔe6/p+ + Ube3a-as ASO	<0.0001
								WT + control ASO vs. Ube3amΔe6/p+ + Snord115 ASO	<0.0001
								Ube3amΔe6/p+ + control ASO vs. Ube3amΔe6/p+ + Ube3a-as ASO	<0.0001
								Ube3amΔe6/p+ + control ASO vs. Ube3amΔe6/p+ + Snord115 ASO	<0.0001
								Ube3amΔe6/p+ + Ube3a-as ASO vs. Ube3amΔe6/p+ + Snord115 ASO	0.2224
	RT-qPCR (Ube3a-ATS)		6 weeks post ASO injection (p6wks)		One-way ANOVA (Tukey multiple comparison)	6/6/6/5	<0.0001	WT + control ASO vs. Ube3amΔe6/p+ + control ASO	0.894
								WT + control ASO vs. Ube3amΔe6/p+ + Ube3a-as ASO	<0.0001
								WT + control ASO vs. Ube3amΔe6/p+ + Snord115 ASO	0.0035
								Ube3amΔe6/p+ + control ASO vs. Ube3amΔe6/p+ + Ube3a-as ASO	<0.0001
								Ube3amΔe6/p+ + control ASO vs. Ube3amΔe6/p+ + Snord115 ASO	0.0155
								Ube3amΔe6/p+ + Ube3a-as ASO vs. Ube3amΔe6/p+ + Snord115 ASO	<0.0001
	RT-qPCR (Ube3a-ATS)		10 weeks post ASO injection (p10wks)		One-way ANOVA (Tukey multiple comparison)	3/3/3/3	<0.0001	WT + control ASO vs. Ube3amΔe6/p+ + control ASO	0.9632
								WT + control ASO vs. Ube3amΔe6/p+ + Ube3a-as ASO	<0.0001
								WT + control ASO vs. Ube3amΔe6/p+ + Snord115 ASO	0.0854
								Ube3amΔe6/p+ + control ASO vs. Ube3amΔe6/p+ + Ube3a-as ASO	<0.0001
								Ube3amΔe6/p+ + control ASO vs. Ube3amΔe6/p+ + Snord115 ASO	0.1652
								Ube3amΔe6/p+ + Ube3a-as ASO vs. Ube3amΔe6/p+ + Snord115 ASO	<0.0001
Fig 4 S1C	RT-qPCR (Ube3a-ATS)		3 weeks post ASO injection (p3wks)	Thalamus + Hypothalamus	One-way ANOVA (Tukey multiple comparison)	4/6/5/4	<0.0001	WT + control ASO vs. Ube3amΔe6/p+ + control ASO	0.3447
								WT + control ASO vs. Ube3amΔe6/p+ + Ube3a-as ASO	<0.0001
								WT + control ASO vs. Ube3amΔe6/p+ + Snord115 ASO	<0.0001
								Ube3amΔe6/p+ + control ASO vs. Ube3amΔe6/p+ + Ube3a-as ASO	<0.0001
								Ube3amΔe6/p+ + control ASO vs. Ube3amΔe6/p+ + Snord115 ASO	<0.0001
								Ube3amΔe6/p+ + Ube3a-as ASO vs. Ube3amΔe6/p+ + Snord115 ASO	0.3003
	RT-qPCR (Ube3a-ATS)		6 weeks post ASO injection (p6wks)		One-way ANOVA (Tukey multiple comparison)	6/6/6/5	<0.0001	WT + control ASO vs. Ube3amΔe6/p+ + control ASO	0.2004
								WT + control ASO vs. Ube3amΔe6/p+ + Ube3a-as ASO	<0.0001
								WT + control ASO vs. Ube3amΔe6/p+ + Snord115 ASO	0.7858
								Ube3amΔe6/p+ + control ASO vs. Ube3amΔe6/p+ + Ube3a-as ASO	<0.0001
								Ube3amΔe6/p+ + control ASO vs. Ube3amΔe6/p+ + Snord115 ASO	0.0414
								Ube3amΔe6/p+ + Ube3a-as ASO vs. Ube3amΔe6/p+ + Snord115 ASO	<0.0001
	RT-qPCR (Ube3a-ATS)		10 weeks post ASO injection (p10wks)		One-way ANOVA (Tukey multiple comparison)	3/3/3/3	<0.0001	WT + control ASO vs. Ube3amΔe6/p+ + control ASO	0.9039
								WT + control ASO vs. Ube3amΔe6/p+ + Ube3a-as ASO	<0.0001
								WT + control ASO vs. Ube3amΔe6/p+ + Snord115 ASO	>0.9999
								Ube3amΔe6/p+ + control ASO vs. Ube3amΔe6/p+ + Ube3a-as ASO	<0.0001
								Ube3amΔe6/p+ + control ASO vs. Ube3amΔe6/p+ + Snord115 ASO	0.8893
								Ube3amΔe6/p+ + Ube3a-as ASO vs. Ube3amΔe6/p+ + Snord115 ASO	<0.0001
Fig 4 S1D	RT-qPCR (Ube3a-ATS)		3 weeks post ASO injection (p3wks)	Olfactory bulb	One-way ANOVA (Tukey multiple comparison)	4/6/5/4	<0.0001	WT + control ASO vs. Ube3amΔe6/p+ + control ASO	0.0068
								WT + control ASO vs. Ube3amΔe6/p+ + Ube3a-as ASO	<0.0001
								WT + control ASO vs. Ube3amΔe6/p+ + Snord115 ASO	<0.0001
								Ube3amΔe6/p+ + control ASO vs. Ube3amΔe6/p+ + Ube3a-as ASO	<0.0001
								Ube3amΔe6/p+ + control ASO vs. Ube3amΔe6/p+ + Snord115 ASO	<0.0001
								Ube3amΔe6/p+ + Ube3a-as ASO vs. Ube3amΔe6/p+ + Snord115 ASO	0.0044
	RT-qPCR (Ube3a-ATS)		6 weeks post ASO injection (p6wks)		One-way ANOVA (Tukey multiple comparison)	6/6/6/5	<0.0001	WT + control ASO vs. Ube3amΔe6/p+ + control ASO	0.3775
								WT + control ASO vs. Ube3amΔe6/p+ + Ube3a-as ASO	<0.0001
								WT + control ASO vs. Ube3amΔe6/p+ + Snord115 ASO	<0.0001
								Ube3amΔe6/p+ + control ASO vs. Ube3amΔe6/p+ + Ube3a-as ASO	<0.0001
								Ube3amΔe6/p+ + control ASO vs. Ube3amΔe6/p+ + Snord115 ASO	0.0011
								Ube3amΔe6/p+ + Ube3a-as ASO vs. Ube3amΔe6/p+ + Snord115 ASO	<0.0001
	RT-qPCR (Ube3a-ATS)		10 weeks post ASO injection (p10wks)		One-way ANOVA (Tukey multiple comparison)	3/3/3/3	<0.0001	WT + control ASO vs. Ube3amΔe6/p+ + control ASO	0.9985
								WT + control ASO vs. Ube3amΔe6/p+ + Ube3a-as ASO	0.0001
								WT + control ASO vs. Ube3amΔe6/p+ + Snord115 ASO	0.1634
								Ube3amΔe6/p+ + control ASO vs. Ube3amΔe6/p+ + Ube3a-as ASO	0.0002
								Ube3amΔe6/p+ + control ASO vs. Ube3amΔe6/p+ + Snord115 ASO	0.2021
								Ube3amΔe6/p+ + Ube3a-as ASO vs. Ube3amΔe6/p+ + Snord115 ASO	0.0014
Fig 4 S1E	RT-qPCR (Ube3a-ATS)		3 weeks post ASO injection (p3wks)	Striatum	One-way ANOVA (Tukey multiple comparison)	3/6/5/4	<0.0001	WT + control ASO vs. Ube3amΔe6/p+ + control ASO	0.6291
								WT + control ASO vs. Ube3amΔe6/p+ + Ube3a-as ASO	<0.0001
								WT + control ASO vs. Ube3amΔe6/p+ + Snord115 ASO	<0.0001
								Ube3amΔe6/p+ + control ASO vs. Ube3amΔe6/p+ + Ube3a-as ASO	<0.0001
								Ube3amΔe6/p+ + control ASO vs. Ube3amΔe6/p+ + Snord115 ASO	<0.0001
								Ube3amΔe6/p+ + Ube3a-as ASO vs. Ube3amΔe6/p+ + Snord115 ASO	0.0412
	RT-qPCR (Ube3a-ATS)		6 weeks post ASO injection (p6wks)		One-way ANOVA (Tukey multiple comparison)	6/6/6/5	<0.0001	WT + control ASO vs. Ube3amΔe6/p+ + control ASO	0.3609
								WT + control ASO vs. Ube3amΔe6/p+ + Ube3a-as ASO	<0.0001
								WT + control ASO vs. Ube3amΔe6/p+ + Snord115 ASO	0.0999
								Ube3amΔe6/p+ + control ASO vs. Ube3amΔe6/p+ + Ube3a-as ASO	<0.0001
								Ube3amΔe6/p+ + control ASO vs. Ube3amΔe6/p+ + Snord115 ASO	0.0034
								Ube3amΔe6/p+ + Ube3a-as ASO vs. Ube3amΔe6/p+ + Snord115 ASO	<0.0001
	RT-qPCR (Ube3a-ATS)		10 weeks post ASO injection (p10wks)		One-way ANOVA (Tukey multiple comparison)	3/3/3/3	0.0024	WT + control ASO vs. Ube3amΔe6/p+ + control ASO	0.9984
								WT + control ASO vs. Ube3amΔe6/p+ + Ube3a-as ASO	0.0051
								WT + control ASO vs. Ube3amΔe6/p+ + Snord115 ASO	0.9984
								Ube3amΔe6/p+ + control ASO vs. Ube3amΔe6/p+ + Ube3a-as ASO	0.0042
								Ube3amΔe6/p+ + control ASO vs. Ube3amΔe6/p+ + Snord115 ASO	0.9875
								Ube3amΔe6/p+ + Ube3a-as ASO vs. Ube3amΔe6/p+ + Snord115 ASO	0.0063
Fig 4 S1F	RT-qPCR (Ube3a-ATS)		3 weeks post ASO injection (p3wks)	Midbrain + Hindbrain	One-way ANOVA (Tukey multiple comparison)	4/6/5/4	<0.0001	WT + control ASO vs. Ube3amΔe6/p+ + control ASO	0.8336
								WT + control ASO vs. Ube3amΔe6/p+ + Ube3a-as ASO	<0.0001
								WT + control ASO vs. Ube3amΔe6/p+ + Snord115 ASO	0.0024
								Ube3amΔe6/p+ + control ASO vs. Ube3amΔe6/p+ + Ube3a-as ASO	<0.0001
								Ube3amΔe6/p+ + control ASO vs. Ube3amΔe6/p+ + Snord115 ASO	0.0002
								Ube3amΔe6/p+ + Ube3a-as ASO vs. Ube3amΔe6/p+ + Snord115 ASO	0.0052
	RT-qPCR (Ube3a-ATS)		6 weeks post ASO injection (p6wks)		One-way ANOVA (Tukey multiple comparison)	6/6/6/5	<0.0001	WT + control ASO vs. Ube3amΔe6/p+ + control ASO	0.9943
								WT + control ASO vs. Ube3amΔe6/p+ + Ube3a-as ASO	<0.0001
								WT + control ASO vs. Ube3amΔe6/p+ + Snord115 ASO	0.0543
								Ube3amΔe6/p+ + control ASO vs. Ube3amΔe6/p+ + Ube3a-as ASO	<0.0001
								Ube3amΔe6/p+ + control ASO vs. Ube3amΔe6/p+ + Snord115 ASO	0.0334
								Ube3amΔe6/p+ + Ube3a-as ASO vs. Ube3amΔe6/p+ + Snord115 ASO	<0.0001
	RT-qPCR (Ube3a-ATS)		10 weeks post ASO injection (p10wks)		One-way ANOVA (Tukey multiple comparison)	3/3/3/3	0.0663	WT + control ASO vs. Ube3amΔe6/p+ + control ASO	0.9611
								WT + control ASO vs. Ube3amΔe6/p+ + Ube3a-as ASO	0.0645
								WT + control ASO vs. Ube3amΔe6/p+ + Snord115 ASO	0.8486
								Ube3amΔe6/p+ + control ASO vs. Ube3amΔe6/p+ + Ube3a-as ASO	0.1272
								Ube3amΔe6/p+ + control ASO vs. Ube3amΔe6/p+ + Snord115 ASO	0.987
								Ube3amΔe6/p+ + Ube3a-as ASO vs. Ube3amΔe6/p+ + Snord115 ASO	0.1994

## Sheet: RT-qPCR Ube3a
Figure	Experiment	ASO injection age	Timepoints after ASO injection	Brain region	Statistical test	n (mouse): WT + control ASO / Ube3amΔe6/p+ + control ASO / Ube3amΔe6/p+ + Ube3a-as ASO / Ube3amΔe6/p+ + Snord115 ASO	P value (summary)	Multiple comparison
								Genotype pair	P value
Fig 4A	RT-qPCR (Ube3a)	Juvenile	3 weeks post ASO injection (p3wks)	Anterior cortex	One-way ANOVA (Tukey multiple comparison)	2/2/2/2	0.0001	WT + control ASO vs. Ube3amΔe6/p+ + control ASO	0.0001
								WT + control ASO vs. Ube3amΔe6/p+ + Ube3a-as ASO	0.0009
								WT + control ASO vs. Ube3amΔe6/p+ + Snord115 ASO	0.0002
								Ube3amΔe6/p+ + control ASO vs. Ube3amΔe6/p+ + Ube3a-as ASO	0.0035
								Ube3amΔe6/p+ + control ASO vs. Ube3amΔe6/p+ + Snord115 ASO	0.1277
								Ube3amΔe6/p+ + Ube3a-as ASO vs. Ube3amΔe6/p+ + Snord115 ASO	0.0168
	RT-qPCR (Ube3a)		6 weeks post ASO injection (p6wks)		One-way ANOVA (Tukey multiple comparison)	2/2/2/3	<0.0001	WT + control ASO vs. Ube3amΔe6/p+ + control ASO	<0.0001
								WT + control ASO vs. Ube3amΔe6/p+ + Ube3a-as ASO	<0.0001
								WT + control ASO vs. Ube3amΔe6/p+ + Snord115 ASO	<0.0001
								Ube3amΔe6/p+ + control ASO vs. Ube3amΔe6/p+ + Ube3a-as ASO	<0.0001
								Ube3amΔe6/p+ + control ASO vs. Ube3amΔe6/p+ + Snord115 ASO	0.0689
								Ube3amΔe6/p+ + Ube3a-as ASO vs. Ube3amΔe6/p+ + Snord115 ASO	<0.0001
	RT-qPCR (Ube3a)		10 weeks post ASO injection (p10wks)		One-way ANOVA (Tukey multiple comparison)	4/5/5/4	<0.0001	WT + control ASO vs. Ube3amΔe6/p+ + control ASO	<0.0001
								WT + control ASO vs. Ube3amΔe6/p+ + Ube3a-as ASO	<0.0001
								WT + control ASO vs. Ube3amΔe6/p+ + Snord115 ASO	<0.0001
								Ube3amΔe6/p+ + control ASO vs. Ube3amΔe6/p+ + Ube3a-as ASO	<0.0001
								Ube3amΔe6/p+ + control ASO vs. Ube3amΔe6/p+ + Snord115 ASO	0.9995
								Ube3amΔe6/p+ + Ube3a-as ASO vs. Ube3amΔe6/p+ + Snord115 ASO	<0.0001
Fig 4 S1A	RT-qPCR (Ube3a)		3 weeks post ASO injection (p3wks)	Posterior cortex	One-way ANOVA (Tukey multiple comparison)	2/2/2/2	0.0008	WT + control ASO vs. Ube3amΔe6/p+ + control ASO	0.0008
								WT + control ASO vs. Ube3amΔe6/p+ + Ube3a-as ASO	0.0072
								WT + control ASO vs. Ube3amΔe6/p+ + Snord115 ASO	0.0016
								Ube3amΔe6/p+ + control ASO vs. Ube3amΔe6/p+ + Ube3a-as ASO	0.0174
								Ube3amΔe6/p+ + control ASO vs. Ube3amΔe6/p+ + Snord115 ASO	0.3018
								Ube3amΔe6/p+ + Ube3a-as ASO vs. Ube3amΔe6/p+ + Snord115 ASO	0.0802
	RT-qPCR (Ube3a)		6 weeks post ASO injection (p6wks)		One-way ANOVA (Tukey multiple comparison)	2/2/2/3	<0.0001	WT + control ASO vs. Ube3amΔe6/p+ + control ASO	<0.0001
								WT + control ASO vs. Ube3amΔe6/p+ + Ube3a-as ASO	<0.0001
								WT + control ASO vs. Ube3amΔe6/p+ + Snord115 ASO	<0.0001
								Ube3amΔe6/p+ + control ASO vs. Ube3amΔe6/p+ + Ube3a-as ASO	<0.0001
								Ube3amΔe6/p+ + control ASO vs. Ube3amΔe6/p+ + Snord115 ASO	0.3394
								Ube3amΔe6/p+ + Ube3a-as ASO vs. Ube3amΔe6/p+ + Snord115 ASO	<0.0001
	RT-qPCR (Ube3a)		10 weeks post ASO injection (p10wks)		One-way ANOVA (Tukey multiple comparison)	4/5/5/4	<0.0001	WT + control ASO vs. Ube3amΔe6/p+ + control ASO	<0.0001
								WT + control ASO vs. Ube3amΔe6/p+ + Ube3a-as ASO	<0.0001
								WT + control ASO vs. Ube3amΔe6/p+ + Snord115 ASO	<0.0001
								Ube3amΔe6/p+ + control ASO vs. Ube3amΔe6/p+ + Ube3a-as ASO	<0.0001
								Ube3amΔe6/p+ + control ASO vs. Ube3amΔe6/p+ + Snord115 ASO	0.9474
								Ube3amΔe6/p+ + Ube3a-as ASO vs. Ube3amΔe6/p+ + Snord115 ASO	<0.0001
Fig 4 S1B	RT-qPCR (Ube3a)		3 weeks post ASO injection (p3wks)	Cerebellum	One-way ANOVA (Tukey multiple comparison)	2/2/2/2	0.0001	WT + control ASO vs. Ube3amΔe6/p+ + control ASO	0.0001
								WT + control ASO vs. Ube3amΔe6/p+ + Ube3a-as ASO	0.0005
								WT + control ASO vs. Ube3amΔe6/p+ + Snord115 ASO	0.0003
								Ube3amΔe6/p+ + control ASO vs. Ube3amΔe6/p+ + Ube3a-as ASO	0.006
								Ube3amΔe6/p+ + control ASO vs. Ube3amΔe6/p+ + Snord115 ASO	0.0138
								Ube3amΔe6/p+ + Ube3a-as ASO vs. Ube3amΔe6/p+ + Snord115 ASO	0.5058
	RT-qPCR (Ube3a)		6 weeks post ASO injection (p6wks)		One-way ANOVA (Tukey multiple comparison)	2/2/2/3	<0.0001	WT + control ASO vs. Ube3amΔe6/p+ + control ASO	<0.0001
								WT + control ASO vs. Ube3amΔe6/p+ + Ube3a-as ASO	<0.0001
								WT + control ASO vs. Ube3amΔe6/p+ + Snord115 ASO	<0.0001
								Ube3amΔe6/p+ + control ASO vs. Ube3amΔe6/p+ + Ube3a-as ASO	<0.0001
								Ube3amΔe6/p+ + control ASO vs. Ube3amΔe6/p+ + Snord115 ASO	0.0007
								Ube3amΔe6/p+ + Ube3a-as ASO vs. Ube3amΔe6/p+ + Snord115 ASO	0.0024
	RT-qPCR (Ube3a)		10 weeks post ASO injection (p10wks)		One-way ANOVA (Tukey multiple comparison)	4/5/5/4	<0.0001	WT + control ASO vs. Ube3amΔe6/p+ + control ASO	<0.0001
								WT + control ASO vs. Ube3amΔe6/p+ + Ube3a-as ASO	<0.0001
								WT + control ASO vs. Ube3amΔe6/p+ + Snord115 ASO	<0.0001
								Ube3amΔe6/p+ + control ASO vs. Ube3amΔe6/p+ + Ube3a-as ASO	<0.0001
								Ube3amΔe6/p+ + control ASO vs. Ube3amΔe6/p+ + Snord115 ASO	0.0154
								Ube3amΔe6/p+ + Ube3a-as ASO vs. Ube3amΔe6/p+ + Snord115 ASO	<0.0001
Fig 4B	RT-qPCR (Ube3a)		3 weeks post ASO injection (p3wks)	Hippocampus	One-way ANOVA (Tukey multiple comparison)	2/2/2/2	0.0012	WT + control ASO vs. Ube3amΔe6/p+ + control ASO	0.001
								WT + control ASO vs. Ube3amΔe6/p+ + Ube3a-as ASO	0.013
								WT + control ASO vs. Ube3amΔe6/p+ + Snord115 ASO	0.0028
								Ube3amΔe6/p+ + control ASO vs. Ube3amΔe6/p+ + Ube3a-as ASO	0.0146
								Ube3amΔe6/p+ + control ASO vs. Ube3amΔe6/p+ + Snord115 ASO	0.1498
								Ube3amΔe6/p+ + Ube3a-as ASO vs. Ube3amΔe6/p+ + Snord115 ASO	0.1193
	RT-qPCR (Ube3a)		6 weeks post ASO injection (p6wks)		One-way ANOVA (Tukey multiple comparison)	2/2/2/3	<0.0001	WT + control ASO vs. Ube3amΔe6/p+ + control ASO	<0.0001
								WT + control ASO vs. Ube3amΔe6/p+ + Ube3a-as ASO	<0.0001
								WT + control ASO vs. Ube3amΔe6/p+ + Snord115 ASO	<0.0001
								Ube3amΔe6/p+ + control ASO vs. Ube3amΔe6/p+ + Ube3a-as ASO	0.0001
								Ube3amΔe6/p+ + control ASO vs. Ube3amΔe6/p+ + Snord115 ASO	0.9184
								Ube3amΔe6/p+ + Ube3a-as ASO vs. Ube3amΔe6/p+ + Snord115 ASO	<0.0001
	RT-qPCR (Ube3a)		10 weeks post ASO injection (p10wks)		One-way ANOVA (Tukey multiple comparison)	4/5/5/4	<0.0001	WT + control ASO vs. Ube3amΔe6/p+ + control ASO	<0.0001
								WT + control ASO vs. Ube3amΔe6/p+ + Ube3a-as ASO	<0.0001
								WT + control ASO vs. Ube3amΔe6/p+ + Snord115 ASO	<0.0001
								Ube3amΔe6/p+ + control ASO vs. Ube3amΔe6/p+ + Ube3a-as ASO	<0.0001
								Ube3amΔe6/p+ + control ASO vs. Ube3amΔe6/p+ + Snord115 ASO	0.9974
								Ube3amΔe6/p+ + Ube3a-as ASO vs. Ube3amΔe6/p+ + Snord115 ASO	<0.0001
Fig 4 S1C	RT-qPCR (Ube3a)		3 weeks post ASO injection (p3wks)	Thalamus + Hypothalamus	One-way ANOVA (Tukey multiple comparison)	2/2/2/2	0.0005	WT + control ASO vs. Ube3amΔe6/p+ + control ASO	0.0004
								WT + control ASO vs. Ube3amΔe6/p+ + Ube3a-as ASO	0.0027
								WT + control ASO vs. Ube3amΔe6/p+ + Snord115 ASO	0.0009
								Ube3amΔe6/p+ + control ASO vs. Ube3amΔe6/p+ + Ube3a-as ASO	0.0196
								Ube3amΔe6/p+ + control ASO vs. Ube3amΔe6/p+ + Snord115 ASO	0.2662
								Ube3amΔe6/p+ + Ube3a-as ASO vs. Ube3amΔe6/p+ + Snord115 ASO	0.1057
	RT-qPCR (Ube3a)		6 weeks post ASO injection (p6wks)		One-way ANOVA (Tukey multiple comparison)	2/2/2/3	<0.0001	WT + control ASO vs. Ube3amΔe6/p+ + control ASO	<0.0001
								WT + control ASO vs. Ube3amΔe6/p+ + Ube3a-as ASO	<0.0001
								WT + control ASO vs. Ube3amΔe6/p+ + Snord115 ASO	<0.0001
								Ube3amΔe6/p+ + control ASO vs. Ube3amΔe6/p+ + Ube3a-as ASO	<0.0001
								Ube3amΔe6/p+ + control ASO vs. Ube3amΔe6/p+ + Snord115 ASO	0.6408
								Ube3amΔe6/p+ + Ube3a-as ASO vs. Ube3amΔe6/p+ + Snord115 ASO	<0.0001
	RT-qPCR (Ube3a)		10 weeks post ASO injection (p10wks)		One-way ANOVA (Tukey multiple comparison)	4/5/5/4	<0.0001	WT + control ASO vs. Ube3amΔe6/p+ + control ASO	<0.0001
								WT + control ASO vs. Ube3amΔe6/p+ + Ube3a-as ASO	<0.0001
								WT + control ASO vs. Ube3amΔe6/p+ + Snord115 ASO	<0.0001
								Ube3amΔe6/p+ + control ASO vs. Ube3amΔe6/p+ + Ube3a-as ASO	<0.0001
								Ube3amΔe6/p+ + control ASO vs. Ube3amΔe6/p+ + Snord115 ASO	0.9865
								Ube3amΔe6/p+ + Ube3a-as ASO vs. Ube3amΔe6/p+ + Snord115 ASO	<0.0001
Fig 4 S1D	RT-qPCR (Ube3a)		3 weeks post ASO injection (p3wks)	Olfactory bulb	One-way ANOVA (Tukey multiple comparison)	2/2/2/2	0.0023	WT + control ASO vs. Ube3amΔe6/p+ + control ASO	0.0017
								WT + control ASO vs. Ube3amΔe6/p+ + Ube3a-as ASO	0.0198
								WT + control ASO vs. Ube3amΔe6/p+ + Snord115 ASO	0.0101
								Ube3amΔe6/p+ + control ASO vs. Ube3amΔe6/p+ + Ube3a-as ASO	0.0247
								Ube3amΔe6/p+ + control ASO vs. Ube3amΔe6/p+ + Snord115 ASO	0.0569
								Ube3amΔe6/p+ + Ube3a-as ASO vs. Ube3amΔe6/p+ + Snord115 ASO	0.6991
	RT-qPCR (Ube3a)		6 weeks post ASO injection (p6wks)		One-way ANOVA (Tukey multiple comparison)	2/2/2/3	<0.0001	WT + control ASO vs. Ube3amΔe6/p+ + control ASO	<0.0001
								WT + control ASO vs. Ube3amΔe6/p+ + Ube3a-as ASO	<0.0001
								WT + control ASO vs. Ube3amΔe6/p+ + Snord115 ASO	<0.0001
								Ube3amΔe6/p+ + control ASO vs. Ube3amΔe6/p+ + Ube3a-as ASO	<0.0001
								Ube3amΔe6/p+ + control ASO vs. Ube3amΔe6/p+ + Snord115 ASO	0.0002
								Ube3amΔe6/p+ + Ube3a-as ASO vs. Ube3amΔe6/p+ + Snord115 ASO	<0.0001
	RT-qPCR (Ube3a)		10 weeks post ASO injection (p10wks)		One-way ANOVA (Tukey multiple comparison)	4/5/5/4	<0.0001	WT + control ASO vs. Ube3amΔe6/p+ + control ASO	<0.0001
								WT + control ASO vs. Ube3amΔe6/p+ + Ube3a-as ASO	0.0058
								WT + control ASO vs. Ube3amΔe6/p+ + Snord115 ASO	<0.0001
								Ube3amΔe6/p+ + control ASO vs. Ube3amΔe6/p+ + Ube3a-as ASO	0.0012
								Ube3amΔe6/p+ + control ASO vs. Ube3amΔe6/p+ + Snord115 ASO	0.9994
								Ube3amΔe6/p+ + Ube3a-as ASO vs. Ube3amΔe6/p+ + Snord115 ASO	0.0025
Fig 4 S1E	RT-qPCR (Ube3a)		3 weeks post ASO injection (p3wks)	Striatum	One-way ANOVA (Tukey multiple comparison)	2/2/2/2	0.0001	WT + control ASO vs. Ube3amΔe6/p+ + control ASO	0.0001
								WT + control ASO vs. Ube3amΔe6/p+ + Ube3a-as ASO	0.0015
								WT + control ASO vs. Ube3amΔe6/p+ + Snord115 ASO	0.0003
								Ube3amΔe6/p+ + control ASO vs. Ube3amΔe6/p+ + Ube3a-as ASO	0.0016
								Ube3amΔe6/p+ + control ASO vs. Ube3amΔe6/p+ + Snord115 ASO	0.0283
								Ube3amΔe6/p+ + Ube3a-as ASO vs. Ube3amΔe6/p+ + Snord115 ASO	0.0153
	RT-qPCR (Ube3a)		6 weeks post ASO injection (p6wks)		One-way ANOVA (Tukey multiple comparison)	2/2/2/3	<0.0001	WT + control ASO vs. Ube3amΔe6/p+ + control ASO	<0.0001
								WT + control ASO vs. Ube3amΔe6/p+ + Ube3a-as ASO	0.0002
								WT + control ASO vs. Ube3amΔe6/p+ + Snord115 ASO	<0.0001
								Ube3amΔe6/p+ + control ASO vs. Ube3amΔe6/p+ + Ube3a-as ASO	0.0002
								Ube3amΔe6/p+ + control ASO vs. Ube3amΔe6/p+ + Snord115 ASO	0.3326
								Ube3amΔe6/p+ + Ube3a-as ASO vs. Ube3amΔe6/p+ + Snord115 ASO	0.0002
	RT-qPCR (Ube3a)		10 weeks post ASO injection (p10wks)		One-way ANOVA (Tukey multiple comparison)	4/5/5/4	<0.0001	WT + control ASO vs. Ube3amΔe6/p+ + control ASO	<0.0001
								WT + control ASO vs. Ube3amΔe6/p+ + Ube3a-as ASO	<0.0001
								WT + control ASO vs. Ube3amΔe6/p+ + Snord115 ASO	<0.0001
								Ube3amΔe6/p+ + control ASO vs. Ube3amΔe6/p+ + Ube3a-as ASO	<0.0001
								Ube3amΔe6/p+ + control ASO vs. Ube3amΔe6/p+ + Snord115 ASO	0.9951
								Ube3amΔe6/p+ + Ube3a-as ASO vs. Ube3amΔe6/p+ + Snord115 ASO	<0.0001
Fig 4 S1F	RT-qPCR (Ube3a)		3 weeks post ASO injection (p3wks)	Midbrain + Hindbrain	One-way ANOVA (Tukey multiple comparison)	2/2/2/2	<0.0001	WT + control ASO vs. Ube3amΔe6/p+ + control ASO	<0.0001
								WT + control ASO vs. Ube3amΔe6/p+ + Ube3a-as ASO	0.0004
								WT + control ASO vs. Ube3amΔe6/p+ + Snord115 ASO	<0.0001
								Ube3amΔe6/p+ + control ASO vs. Ube3amΔe6/p+ + Ube3a-as ASO	0.0009
								Ube3amΔe6/p+ + control ASO vs. Ube3amΔe6/p+ + Snord115 ASO	0.3131
								Ube3amΔe6/p+ + Ube3a-as ASO vs. Ube3amΔe6/p+ + Snord115 ASO	0.0017
	RT-qPCR (Ube3a)		6 weeks post ASO injection (p6wks)		One-way ANOVA (Tukey multiple comparison)	2/2/2/3	<0.0001	WT + control ASO vs. Ube3amΔe6/p+ + control ASO	<0.0001
								WT + control ASO vs. Ube3amΔe6/p+ + Ube3a-as ASO	<0.0001
								WT + control ASO vs. Ube3amΔe6/p+ + Snord115 ASO	<0.0001
								Ube3amΔe6/p+ + control ASO vs. Ube3amΔe6/p+ + Ube3a-as ASO	0.0004
								Ube3amΔe6/p+ + control ASO vs. Ube3amΔe6/p+ + Snord115 ASO	0.7318
								Ube3amΔe6/p+ + Ube3a-as ASO vs. Ube3amΔe6/p+ + Snord115 ASO	0.0004
	RT-qPCR (Ube3a)		10 weeks post ASO injection (p10wks)		One-way ANOVA (Tukey multiple comparison)	4/5/5/4	<0.0001	WT + control ASO vs. Ube3amΔe6/p+ + control ASO	<0.0001
								WT + control ASO vs. Ube3amΔe6/p+ + Ube3a-as ASO	<0.0001
								WT + control ASO vs. Ube3amΔe6/p+ + Snord115 ASO	<0.0001
								Ube3amΔe6/p+ + control ASO vs. Ube3amΔe6/p+ + Ube3a-as ASO	<0.0001
								Ube3amΔe6/p+ + control ASO vs. Ube3amΔe6/p+ + Snord115 ASO	0.999
								Ube3amΔe6/p+ + Ube3a-as ASO vs. Ube3amΔe6/p+ + Snord115 ASO	<0.0001
Fig 4A	RT-qPCR (Ube3a)	Adult	3 weeks post ASO injection (p3wks)	Anterior cortex	One-way ANOVA (Tukey multiple comparison)	4/6/5/4	<0.0001	WT + control ASO vs. Ube3amΔe6/p+ + control ASO	<0.0001
								WT + control ASO vs. Ube3amΔe6/p+ + Ube3a-as ASO	<0.0001
								WT + control ASO vs. Ube3amΔe6/p+ + Snord115 ASO	<0.0001
								Ube3amΔe6/p+ + control ASO vs. Ube3amΔe6/p+ + Ube3a-as ASO	<0.0001
								Ube3amΔe6/p+ + control ASO vs. Ube3amΔe6/p+ + Snord115 ASO	0.208
								Ube3amΔe6/p+ + Ube3a-as ASO vs. Ube3amΔe6/p+ + Snord115 ASO	<0.0001
	RT-qPCR (Ube3a)		6 weeks post ASO injection (p6wks)		One-way ANOVA (Tukey multiple comparison)	6/6/6/5	<0.0001	WT + control ASO vs. Ube3amΔe6/p+ + control ASO	<0.0001
								WT + control ASO vs. Ube3amΔe6/p+ + Ube3a-as ASO	<0.0001
								WT + control ASO vs. Ube3amΔe6/p+ + Snord115 ASO	<0.0001
								Ube3amΔe6/p+ + control ASO vs. Ube3amΔe6/p+ + Ube3a-as ASO	<0.0001
								Ube3amΔe6/p+ + control ASO vs. Ube3amΔe6/p+ + Snord115 ASO	0.9976
								Ube3amΔe6/p+ + Ube3a-as ASO vs. Ube3amΔe6/p+ + Snord115 ASO	<0.0001
	RT-qPCR (Ube3a)		10 weeks post ASO injection (p10wks)		One-way ANOVA (Tukey multiple comparison)	3/3/3/3	<0.0001	WT + control ASO vs. Ube3amΔe6/p+ + control ASO	<0.0001
								WT + control ASO vs. Ube3amΔe6/p+ + Ube3a-as ASO	<0.0001
								WT + control ASO vs. Ube3amΔe6/p+ + Snord115 ASO	<0.0001
								Ube3amΔe6/p+ + control ASO vs. Ube3amΔe6/p+ + Ube3a-as ASO	0.2647
								Ube3amΔe6/p+ + control ASO vs. Ube3amΔe6/p+ + Snord115 ASO	0.9875
								Ube3amΔe6/p+ + Ube3a-as ASO vs. Ube3amΔe6/p+ + Snord115 ASO	0.3944
Fig 4 S1A	RT-qPCR (Ube3a)		3 weeks post ASO injection (p3wks)	Posterior cortex	One-way ANOVA (Tukey multiple comparison)	4/6/5/4	<0.0001	WT + control ASO vs. Ube3amΔe6/p+ + control ASO	<0.0001
								WT + control ASO vs. Ube3amΔe6/p+ + Ube3a-as ASO	<0.0001
								WT + control ASO vs. Ube3amΔe6/p+ + Snord115 ASO	<0.0001
								Ube3amΔe6/p+ + control ASO vs. Ube3amΔe6/p+ + Ube3a-as ASO	<0.0001
								Ube3amΔe6/p+ + control ASO vs. Ube3amΔe6/p+ + Snord115 ASO	0.0046
								Ube3amΔe6/p+ + Ube3a-as ASO vs. Ube3amΔe6/p+ + Snord115 ASO	0.0007
	RT-qPCR (Ube3a)		6 weeks post ASO injection (p6wks)		One-way ANOVA (Tukey multiple comparison)	6/6/6/5	<0.0001	WT + control ASO vs. Ube3amΔe6/p+ + control ASO	<0.0001
								WT + control ASO vs. Ube3amΔe6/p+ + Ube3a-as ASO	<0.0001
								WT + control ASO vs. Ube3amΔe6/p+ + Snord115 ASO	<0.0001
								Ube3amΔe6/p+ + control ASO vs. Ube3amΔe6/p+ + Ube3a-as ASO	<0.0001
								Ube3amΔe6/p+ + control ASO vs. Ube3amΔe6/p+ + Snord115 ASO	0.9992
								Ube3amΔe6/p+ + Ube3a-as ASO vs. Ube3amΔe6/p+ + Snord115 ASO	<0.0001
	RT-qPCR (Ube3a)		10 weeks post ASO injection (p10wks)		One-way ANOVA (Tukey multiple comparison)	3/3/3/3	<0.0001	WT + control ASO vs. Ube3amΔe6/p+ + control ASO	<0.0001
								WT + control ASO vs. Ube3amΔe6/p+ + Ube3a-as ASO	<0.0001
								WT + control ASO vs. Ube3amΔe6/p+ + Snord115 ASO	<0.0001
								Ube3amΔe6/p+ + control ASO vs. Ube3amΔe6/p+ + Ube3a-as ASO	0.0068
								Ube3amΔe6/p+ + control ASO vs. Ube3amΔe6/p+ + Snord115 ASO	0.9993
								Ube3amΔe6/p+ + Ube3a-as ASO vs. Ube3amΔe6/p+ + Snord115 ASO	0.0079
Fig 4 S1B	RT-qPCR (Ube3a)		3 weeks post ASO injection (p3wks)	Cerebellum	One-way ANOVA (Tukey multiple comparison)	4/6/5/4	<0.0001	WT + control ASO vs. Ube3amΔe6/p+ + control ASO	<0.0001
								WT + control ASO vs. Ube3amΔe6/p+ + Ube3a-as ASO	<0.0001
								WT + control ASO vs. Ube3amΔe6/p+ + Snord115 ASO	<0.0001
								Ube3amΔe6/p+ + control ASO vs. Ube3amΔe6/p+ + Ube3a-as ASO	<0.0001
								Ube3amΔe6/p+ + control ASO vs. Ube3amΔe6/p+ + Snord115 ASO	<0.0001
								Ube3amΔe6/p+ + Ube3a-as ASO vs. Ube3amΔe6/p+ + Snord115 ASO	0.3284
	RT-qPCR (Ube3a)		6 weeks post ASO injection (p6wks)		One-way ANOVA (Tukey multiple comparison)	6/6/6/5	<0.0001	WT + control ASO vs. Ube3amΔe6/p+ + control ASO	<0.0001
								WT + control ASO vs. Ube3amΔe6/p+ + Ube3a-as ASO	<0.0001
								WT + control ASO vs. Ube3amΔe6/p+ + Snord115 ASO	<0.0001
								Ube3amΔe6/p+ + control ASO vs. Ube3amΔe6/p+ + Ube3a-as ASO	<0.0001
								Ube3amΔe6/p+ + control ASO vs. Ube3amΔe6/p+ + Snord115 ASO	<0.0001
								Ube3amΔe6/p+ + Ube3a-as ASO vs. Ube3amΔe6/p+ + Snord115 ASO	<0.0001
	RT-qPCR (Ube3a)		10 weeks post ASO injection (p10wks)		One-way ANOVA (Tukey multiple comparison)	3/3/3/3	<0.0001	WT + control ASO vs. Ube3amΔe6/p+ + control ASO	<0.0001
								WT + control ASO vs. Ube3amΔe6/p+ + Ube3a-as ASO	<0.0001
								WT + control ASO vs. Ube3amΔe6/p+ + Snord115 ASO	<0.0001
								Ube3amΔe6/p+ + control ASO vs. Ube3amΔe6/p+ + Ube3a-as ASO	0.0573
								Ube3amΔe6/p+ + control ASO vs. Ube3amΔe6/p+ + Snord115 ASO	0.8929
								Ube3amΔe6/p+ + Ube3a-as ASO vs. Ube3amΔe6/p+ + Snord115 ASO	0.1539
Fig 4B	RT-qPCR (Ube3a)		3 weeks post ASO injection (p3wks)	Hippocampus	One-way ANOVA (Tukey multiple comparison)	4/6/5/4	<0.0001	WT + control ASO vs. Ube3amΔe6/p+ + control ASO	<0.0001
								WT + control ASO vs. Ube3amΔe6/p+ + Ube3a-as ASO	<0.0001
								WT + control ASO vs. Ube3amΔe6/p+ + Snord115 ASO	<0.0001
								Ube3amΔe6/p+ + control ASO vs. Ube3amΔe6/p+ + Ube3a-as ASO	<0.0001
								Ube3amΔe6/p+ + control ASO vs. Ube3amΔe6/p+ + Snord115 ASO	0.0038
								Ube3amΔe6/p+ + Ube3a-as ASO vs. Ube3amΔe6/p+ + Snord115 ASO	0.0031
	RT-qPCR (Ube3a)		6 weeks post ASO injection (p6wks)		One-way ANOVA (Tukey multiple comparison)	6/6/6/5	<0.0001	WT + control ASO vs. Ube3amΔe6/p+ + control ASO	<0.0001
								WT + control ASO vs. Ube3amΔe6/p+ + Ube3a-as ASO	<0.0001
								WT + control ASO vs. Ube3amΔe6/p+ + Snord115 ASO	<0.0001
								Ube3amΔe6/p+ + control ASO vs. Ube3amΔe6/p+ + Ube3a-as ASO	<0.0001
								Ube3amΔe6/p+ + control ASO vs. Ube3amΔe6/p+ + Snord115 ASO	0.8586
								Ube3amΔe6/p+ + Ube3a-as ASO vs. Ube3amΔe6/p+ + Snord115 ASO	<0.0001
	RT-qPCR (Ube3a)		10 weeks post ASO injection (p10wks)		One-way ANOVA (Tukey multiple comparison)	3/3/3/3	<0.0001	WT + control ASO vs. Ube3amΔe6/p+ + control ASO	<0.0001
								WT + control ASO vs. Ube3amΔe6/p+ + Ube3a-as ASO	<0.0001
								WT + control ASO vs. Ube3amΔe6/p+ + Snord115 ASO	<0.0001
								Ube3amΔe6/p+ + control ASO vs. Ube3amΔe6/p+ + Ube3a-as ASO	0.0044
								Ube3amΔe6/p+ + control ASO vs. Ube3amΔe6/p+ + Snord115 ASO	0.9902
								Ube3amΔe6/p+ + Ube3a-as ASO vs. Ube3amΔe6/p+ + Snord115 ASO	0.0064
Fig 4 S1C	RT-qPCR (Ube3a)		3 weeks post ASO injection (p3wks)	Thalamus + Hypothalamus	One-way ANOVA (Tukey multiple comparison)	4/6/5/4	<0.0001	WT + control ASO vs. Ube3amΔe6/p+ + control ASO	<0.0001
								WT + control ASO vs. Ube3amΔe6/p+ + Ube3a-as ASO	<0.0001
								WT + control ASO vs. Ube3amΔe6/p+ + Snord115 ASO	<0.0001
								Ube3amΔe6/p+ + control ASO vs. Ube3amΔe6/p+ + Ube3a-as ASO	<0.0001
								Ube3amΔe6/p+ + control ASO vs. Ube3amΔe6/p+ + Snord115 ASO	0.0029
								Ube3amΔe6/p+ + Ube3a-as ASO vs. Ube3amΔe6/p+ + Snord115 ASO	<0.0001
	RT-qPCR (Ube3a)		6 weeks post ASO injection (p6wks)		One-way ANOVA (Tukey multiple comparison)	6/6/6/5	<0.0001	WT + control ASO vs. Ube3amΔe6/p+ + control ASO	<0.0001
								WT + control ASO vs. Ube3amΔe6/p+ + Ube3a-as ASO	<0.0001
								WT + control ASO vs. Ube3amΔe6/p+ + Snord115 ASO	<0.0001
								Ube3amΔe6/p+ + control ASO vs. Ube3amΔe6/p+ + Ube3a-as ASO	<0.0001
								Ube3amΔe6/p+ + control ASO vs. Ube3amΔe6/p+ + Snord115 ASO	>0.9999
								Ube3amΔe6/p+ + Ube3a-as ASO vs. Ube3amΔe6/p+ + Snord115 ASO	<0.0001
	RT-qPCR (Ube3a)		10 weeks post ASO injection (p10wks)		One-way ANOVA (Tukey multiple comparison)	3/3/3/3	<0.0001	WT + control ASO vs. Ube3amΔe6/p+ + control ASO	<0.0001
								WT + control ASO vs. Ube3amΔe6/p+ + Ube3a-as ASO	<0.0001
								WT + control ASO vs. Ube3amΔe6/p+ + Snord115 ASO	<0.0001
								Ube3amΔe6/p+ + control ASO vs. Ube3amΔe6/p+ + Ube3a-as ASO	0.0083
								Ube3amΔe6/p+ + control ASO vs. Ube3amΔe6/p+ + Snord115 ASO	0.9557
								Ube3amΔe6/p+ + Ube3a-as ASO vs. Ube3amΔe6/p+ + Snord115 ASO	0.0161
Fig 4 S1D	RT-qPCR (Ube3a)		3 weeks post ASO injection (p3wks)	Olfactory bulb	One-way ANOVA (Tukey multiple comparison)	4/6/5/4	<0.0001	WT + control ASO vs. Ube3amΔe6/p+ + control ASO	<0.0001
								WT + control ASO vs. Ube3amΔe6/p+ + Ube3a-as ASO	<0.0001
								WT + control ASO vs. Ube3amΔe6/p+ + Snord115 ASO	<0.0001
								Ube3amΔe6/p+ + control ASO vs. Ube3amΔe6/p+ + Ube3a-as ASO	<0.0001
								Ube3amΔe6/p+ + control ASO vs. Ube3amΔe6/p+ + Snord115 ASO	<0.0001
								Ube3amΔe6/p+ + Ube3a-as ASO vs. Ube3amΔe6/p+ + Snord115 ASO	0.0116
	RT-qPCR (Ube3a)		6 weeks post ASO injection (p6wks)		One-way ANOVA (Tukey multiple comparison)	6/6/6/5	<0.0001	WT + control ASO vs. Ube3amΔe6/p+ + control ASO	<0.0001
								WT + control ASO vs. Ube3amΔe6/p+ + Ube3a-as ASO	<0.0001
								WT + control ASO vs. Ube3amΔe6/p+ + Snord115 ASO	<0.0001
								Ube3amΔe6/p+ + control ASO vs. Ube3amΔe6/p+ + Ube3a-as ASO	<0.0001
								Ube3amΔe6/p+ + control ASO vs. Ube3amΔe6/p+ + Snord115 ASO	0.0186
								Ube3amΔe6/p+ + Ube3a-as ASO vs. Ube3amΔe6/p+ + Snord115 ASO	0.0023
	RT-qPCR (Ube3a)		10 weeks post ASO injection (p10wks)		One-way ANOVA (Tukey multiple comparison)	3/3/3/3	<0.0001	WT + control ASO vs. Ube3amΔe6/p+ + control ASO	<0.0001
								WT + control ASO vs. Ube3amΔe6/p+ + Ube3a-as ASO	<0.0001
								WT + control ASO vs. Ube3amΔe6/p+ + Snord115 ASO	<0.0001
								Ube3amΔe6/p+ + control ASO vs. Ube3amΔe6/p+ + Ube3a-as ASO	0.0434
								Ube3amΔe6/p+ + control ASO vs. Ube3amΔe6/p+ + Snord115 ASO	0.9997
								Ube3amΔe6/p+ + Ube3a-as ASO vs. Ube3amΔe6/p+ + Snord115 ASO	0.0492
Fig 4 S1E	RT-qPCR (Ube3a)		3 weeks post ASO injection (p3wks)	Striatum	One-way ANOVA (Tukey multiple comparison)	3/6/5/4	<0.0001	WT + control ASO vs. Ube3amΔe6/p+ + control ASO	<0.0001
								WT + control ASO vs. Ube3amΔe6/p+ + Ube3a-as ASO	<0.0001
								WT + control ASO vs. Ube3amΔe6/p+ + Snord115 ASO	<0.0001
								Ube3amΔe6/p+ + control ASO vs. Ube3amΔe6/p+ + Ube3a-as ASO	<0.0001
								Ube3amΔe6/p+ + control ASO vs. Ube3amΔe6/p+ + Snord115 ASO	0.0672
								Ube3amΔe6/p+ + Ube3a-as ASO vs. Ube3amΔe6/p+ + Snord115 ASO	0.0005
	RT-qPCR (Ube3a)		6 weeks post ASO injection (p6wks)		One-way ANOVA (Tukey multiple comparison)	6/6/6/5	<0.0001	WT + control ASO vs. Ube3amΔe6/p+ + control ASO	<0.0001
								WT + control ASO vs. Ube3amΔe6/p+ + Ube3a-as ASO	<0.0001
								WT + control ASO vs. Ube3amΔe6/p+ + Snord115 ASO	<0.0001
								Ube3amΔe6/p+ + control ASO vs. Ube3amΔe6/p+ + Ube3a-as ASO	<0.0001
								Ube3amΔe6/p+ + control ASO vs. Ube3amΔe6/p+ + Snord115 ASO	0.9485
								Ube3amΔe6/p+ + Ube3a-as ASO vs. Ube3amΔe6/p+ + Snord115 ASO	<0.0001
	RT-qPCR (Ube3a)		10 weeks post ASO injection (p10wks)		One-way ANOVA (Tukey multiple comparison)	3/3/3/3	<0.0001	WT + control ASO vs. Ube3amΔe6/p+ + control ASO	<0.0001
								WT + control ASO vs. Ube3amΔe6/p+ + Ube3a-as ASO	<0.0001
								WT + control ASO vs. Ube3amΔe6/p+ + Snord115 ASO	<0.0001
								Ube3amΔe6/p+ + control ASO vs. Ube3amΔe6/p+ + Ube3a-as ASO	0.3725
								Ube3amΔe6/p+ + control ASO vs. Ube3amΔe6/p+ + Snord115 ASO	0.9995
								Ube3amΔe6/p+ + Ube3a-as ASO vs. Ube3amΔe6/p+ + Snord115 ASO	0.4227
Fig 4 S1F	RT-qPCR (Ube3a)		3 weeks post ASO injection (p3wks)	Midbrain + Hindbrain	One-way ANOVA (Tukey multiple comparison)	4/6/5/4	<0.0001	WT + control ASO vs. Ube3amΔe6/p+ + control ASO	<0.0001
								WT + control ASO vs. Ube3amΔe6/p+ + Ube3a-as ASO	<0.0001
								WT + control ASO vs. Ube3amΔe6/p+ + Snord115 ASO	<0.0001
								Ube3amΔe6/p+ + control ASO vs. Ube3amΔe6/p+ + Ube3a-as ASO	<0.0001
								Ube3amΔe6/p+ + control ASO vs. Ube3amΔe6/p+ + Snord115 ASO	0.1574
								Ube3amΔe6/p+ + Ube3a-as ASO vs. Ube3amΔe6/p+ + Snord115 ASO	<0.0001
	RT-qPCR (Ube3a)		6 weeks post ASO injection (p6wks)		One-way ANOVA (Tukey multiple comparison)	6/6/6/5	<0.0001	WT + control ASO vs. Ube3amΔe6/p+ + control ASO	<0.0001
								WT + control ASO vs. Ube3amΔe6/p+ + Ube3a-as ASO	<0.0001
								WT + control ASO vs. Ube3amΔe6/p+ + Snord115 ASO	<0.0001
								Ube3amΔe6/p+ + control ASO vs. Ube3amΔe6/p+ + Ube3a-as ASO	<0.0001
								Ube3amΔe6/p+ + control ASO vs. Ube3amΔe6/p+ + Snord115 ASO	0.9061
								Ube3amΔe6/p+ + Ube3a-as ASO vs. Ube3amΔe6/p+ + Snord115 ASO	<0.0001
	RT-qPCR (Ube3a)		10 weeks post ASO injection (p10wks)		One-way ANOVA (Tukey multiple comparison)	3/3/3/3	<0.0001	WT + control ASO vs. Ube3amΔe6/p+ + control ASO	<0.0001
								WT + control ASO vs. Ube3amΔe6/p+ + Ube3a-as ASO	<0.0001
								WT + control ASO vs. Ube3amΔe6/p+ + Snord115 ASO	<0.0001
								Ube3amΔe6/p+ + control ASO vs. Ube3amΔe6/p+ + Ube3a-as ASO	0.3388
								Ube3amΔe6/p+ + control ASO vs. Ube3amΔe6/p+ + Snord115 ASO	0.9997
								Ube3amΔe6/p+ + Ube3a-as ASO vs. Ube3amΔe6/p+ + Snord115 ASO	0.3012

## Sheet: Protein-RNA correlations
Figure	Experiment	Correlations	Brain region	Fitting line or curve	n (mouse): Ube3amΔe6/p+ + control ASO / Ube3amΔe6/p+ + Ube3a-as ASO / Ube3amΔe6/p+ + Snord115 ASO	Best-fit values			Goodness of Fit	Correlation analysis
						K	Halflife	Tau	R squared	P value (two-tailed)
Fig 4C	RT-qPCR, Western blot	Ube3a-ATS and Ube3a protein	Anterior cortex	Nonlinear regression (curve fit), One phase decay: Y=(Y0 - Plateau)*exp(-K*X) + Plateau	20/20/19	1.428	0.4853	0.7002	0.7944	<0.0001
			Posterior cortex			4.093	0.1693	0.2443	0.8145	<0.0001
			Cerebellum			0.3323	2.086	3.009	0.3512	<0.0001
			Hippocampus			2.548	0.272	0.3924	0.7585	<0.0001
			Thalamus + Hypothalamus			3.071	0.2257	0.3256	0.8371	<0.0001
			Olfactory bulb			2.478	0.2797	0.4035	0.6852	<0.0001
			Striatum			2.992	0.2317	0.3342	0.7006	<0.0001
			Midbrain + Hindbrain			4.656	0.1489	0.2148	0.6921	<0.0001
Fig 4 S2A	RT-qPCR	Ube3a-ATS and Ube3a	Anterior cortex		24/23/21	2.829	0.2451	0.3535	0.8761	<0.0001
			Posterior cortex			3.013	0.2301	0.3319	0.9115	<0.0001
			Cerebellum			1.404	0.4937	0.7123	0.5447	<0.0001
			Hippocampus			2.389	0.2901	0.4185	0.8291	<0.0001
			Thalamus + Hypothalamus			3.166	0.219	0.3159	0.8865	<0.0001
			Olfactory bulb			2.263	0.3063	0.4419	0.6039	<0.0001
			Striatum			3.749	0.1849	0.2668	0.8502	<0.0001
			Midbrain + Hindbrain			3.348	0.207	0.2987	0.8273	<0.0001
Figure	Experiment	Correlations	Brain region	Fitting line or curve	n (mouse): WT + control ASO / Ube3amΔe6/p+ + control ASO / Ube3amΔe6/p+ + Ube3a-as ASO / Ube3amΔe6/p+ + Snord115 ASO	Best-fit values			Goodness of Fit	Correlation analysis
						Slope	Y-intercept	X-intercept	R squared	P value (two-tailed)
Fig 4 S2B	RT-qPCR, Western blot	Ube3a and Ube3a protein	Anterior cortex	Simple linear regression	19/20/20/19	1.01	-0.009413	0.009316	0.9351	<0.0001
			Posterior cortex			1.014	0.003619	-0.00357	0.9302	<0.0001
			Cerebellum			1.087	-0.09598	0.08831	0.9308	<0.0001
			Hippocampus			1.015	0.01573	-0.0155	0.908	<0.0001
			Thalamus + Hypothalamus			1.037	-0.04061	0.03918	0.9691	<0.0001
			Olfactory bulb			0.9413	0.04397	-0.04672	0.8624	<0.0001
			Striatum		18/20/20/19	1.048	-0.04525	0.04317	0.9441	<0.0001
			Midbrain + Hindbrain		19/20/20/19	1.021	-0.005506	0.005393	0.9492	<0.0001

## Sheet: EEG-relative PSD
Figure	Experiment	ASO injection age	Timepoints after ASO injection	Brain region	Frequency band	Statistical test	n (mouse): WT + control ASO / Ube3amΔe6/p+ + control ASO / Ube3amΔe6/p+ + Ube3a-as ASO / Ube3amΔe6/p+ + Snord115 ASO	P value (summary with genotype as source of variation)	Multiple comparison
									Genotype pair	P value
Fig 5 S2A	EEG (PSD analysis: Relative band power)	Juvenile	3 weeks post ASO injection (p3wks)	Frontal cortex	1-4Hz	Two-way ANOVA (Tukey multiple comparison)	9/9/9/8	0.1796	WT + control ASO vs. Ube3amΔe6/p+ + control ASO	0.2501
									WT + control ASO vs. Ube3amΔe6/p+ + Ube3a-as ASO	0.9991
									WT + control ASO vs. Ube3amΔe6/p+ + Snord115 ASO	0.6853
									Ube3amΔe6/p+ + control ASO vs. Ube3amΔe6/p+ + Ube3a-as ASO	0.7438
									Ube3amΔe6/p+ + control ASO vs. Ube3amΔe6/p+ + Snord115 ASO	0.9219
									Ube3amΔe6/p+ + Ube3a-as ASO vs. Ube3amΔe6/p+ + Snord115 ASO	0.9245
					4-8Hz				WT + control ASO vs. Ube3amΔe6/p+ + control ASO	0.7191
									WT + control ASO vs. Ube3amΔe6/p+ + Ube3a-as ASO	0.91
									WT + control ASO vs. Ube3amΔe6/p+ + Snord115 ASO	0.9976
									Ube3amΔe6/p+ + control ASO vs. Ube3amΔe6/p+ + Ube3a-as ASO	0.519
									Ube3amΔe6/p+ + control ASO vs. Ube3amΔe6/p+ + Snord115 ASO	0.8448
									Ube3amΔe6/p+ + Ube3a-as ASO vs. Ube3amΔe6/p+ + Snord115 ASO	0.8614
					8-13Hz				WT + control ASO vs. Ube3amΔe6/p+ + control ASO	0.0002
									WT + control ASO vs. Ube3amΔe6/p+ + Ube3a-as ASO	0.8581
									WT + control ASO vs. Ube3amΔe6/p+ + Snord115 ASO	0.6532
									Ube3amΔe6/p+ + control ASO vs. Ube3amΔe6/p+ + Ube3a-as ASO	0.0002
									Ube3amΔe6/p+ + control ASO vs. Ube3amΔe6/p+ + Snord115 ASO	0.0946
									Ube3amΔe6/p+ + Ube3a-as ASO vs. Ube3amΔe6/p+ + Snord115 ASO	0.365
					13-18Hz				WT + control ASO vs. Ube3amΔe6/p+ + control ASO	<0.0001
									WT + control ASO vs. Ube3amΔe6/p+ + Ube3a-as ASO	0.5282
									WT + control ASO vs. Ube3amΔe6/p+ + Snord115 ASO	0.5763
									Ube3amΔe6/p+ + control ASO vs. Ube3amΔe6/p+ + Ube3a-as ASO	<0.0001
									Ube3amΔe6/p+ + control ASO vs. Ube3amΔe6/p+ + Snord115 ASO	0.0131
									Ube3amΔe6/p+ + Ube3a-as ASO vs. Ube3amΔe6/p+ + Snord115 ASO	0.1283
					18-25Hz				WT + control ASO vs. Ube3amΔe6/p+ + control ASO	0.0003
									WT + control ASO vs. Ube3amΔe6/p+ + Ube3a-as ASO	0.989
									WT + control ASO vs. Ube3amΔe6/p+ + Snord115 ASO	0.4221
									Ube3amΔe6/p+ + control ASO vs. Ube3amΔe6/p+ + Ube3a-as ASO	0.0176
									Ube3amΔe6/p+ + control ASO vs. Ube3amΔe6/p+ + Snord115 ASO	0.0607
									Ube3amΔe6/p+ + Ube3a-as ASO vs. Ube3amΔe6/p+ + Snord115 ASO	0.5175
					25-50Hz				WT + control ASO vs. Ube3amΔe6/p+ + control ASO	0.8615
									WT + control ASO vs. Ube3amΔe6/p+ + Ube3a-as ASO	0.7131
									WT + control ASO vs. Ube3amΔe6/p+ + Snord115 ASO	0.9551
									Ube3amΔe6/p+ + control ASO vs. Ube3amΔe6/p+ + Ube3a-as ASO	0.437
									Ube3amΔe6/p+ + control ASO vs. Ube3amΔe6/p+ + Snord115 ASO	0.6115
									Ube3amΔe6/p+ + Ube3a-as ASO vs. Ube3amΔe6/p+ + Snord115 ASO	0.8955
					50-100Hz				WT + control ASO vs. Ube3amΔe6/p+ + control ASO	0.0557
									WT + control ASO vs. Ube3amΔe6/p+ + Ube3a-as ASO	0.997
									WT + control ASO vs. Ube3amΔe6/p+ + Snord115 ASO	0.905
									Ube3amΔe6/p+ + control ASO vs. Ube3amΔe6/p+ + Ube3a-as ASO	0.1997
									Ube3amΔe6/p+ + control ASO vs. Ube3amΔe6/p+ + Snord115 ASO	0.1439
									Ube3amΔe6/p+ + Ube3a-as ASO vs. Ube3amΔe6/p+ + Snord115 ASO	0.8992
Fig 5 S2A	EEG (PSD analysis: Relative band power)		6 weeks post ASO injection (p6wks)		1-4Hz	Two-way ANOVA (Tukey multiple comparison)	9/9/9/8	0.0413	WT + control ASO vs. Ube3amΔe6/p+ + control ASO	0.2181
									WT + control ASO vs. Ube3amΔe6/p+ + Ube3a-as ASO	0.9948
									WT + control ASO vs. Ube3amΔe6/p+ + Snord115 ASO	0.9484
									Ube3amΔe6/p+ + control ASO vs. Ube3amΔe6/p+ + Ube3a-as ASO	0.8371
									Ube3amΔe6/p+ + control ASO vs. Ube3amΔe6/p+ + Snord115 ASO	0.8379
									Ube3amΔe6/p+ + Ube3a-as ASO vs. Ube3amΔe6/p+ + Snord115 ASO	0.9984
					4-8Hz				WT + control ASO vs. Ube3amΔe6/p+ + control ASO	0.5293
									WT + control ASO vs. Ube3amΔe6/p+ + Ube3a-as ASO	0.8663
									WT + control ASO vs. Ube3amΔe6/p+ + Snord115 ASO	0.4384
									Ube3amΔe6/p+ + control ASO vs. Ube3amΔe6/p+ + Ube3a-as ASO	0.4177
									Ube3amΔe6/p+ + control ASO vs. Ube3amΔe6/p+ + Snord115 ASO	0.9629
									Ube3amΔe6/p+ + Ube3a-as ASO vs. Ube3amΔe6/p+ + Snord115 ASO	0.3241
					8-13Hz				WT + control ASO vs. Ube3amΔe6/p+ + control ASO	0.0001
									WT + control ASO vs. Ube3amΔe6/p+ + Ube3a-as ASO	0.2677
									WT + control ASO vs. Ube3amΔe6/p+ + Snord115 ASO	0.2149
									Ube3amΔe6/p+ + control ASO vs. Ube3amΔe6/p+ + Ube3a-as ASO	<0.0001
									Ube3amΔe6/p+ + control ASO vs. Ube3amΔe6/p+ + Snord115 ASO	0.5759
									Ube3amΔe6/p+ + Ube3a-as ASO vs. Ube3amΔe6/p+ + Snord115 ASO	0.0322
					13-18Hz				WT + control ASO vs. Ube3amΔe6/p+ + control ASO	<0.0001
									WT + control ASO vs. Ube3amΔe6/p+ + Ube3a-as ASO	0.8099
									WT + control ASO vs. Ube3amΔe6/p+ + Snord115 ASO	0.2094
									Ube3amΔe6/p+ + control ASO vs. Ube3amΔe6/p+ + Ube3a-as ASO	<0.0001
									Ube3amΔe6/p+ + control ASO vs. Ube3amΔe6/p+ + Snord115 ASO	0.1033
									Ube3amΔe6/p+ + Ube3a-as ASO vs. Ube3amΔe6/p+ + Snord115 ASO	0.0856
					18-25Hz				WT + control ASO vs. Ube3amΔe6/p+ + control ASO	0.0006
									WT + control ASO vs. Ube3amΔe6/p+ + Ube3a-as ASO	0.9955
									WT + control ASO vs. Ube3amΔe6/p+ + Snord115 ASO	0.6204
									Ube3amΔe6/p+ + control ASO vs. Ube3amΔe6/p+ + Ube3a-as ASO	0.1136
									Ube3amΔe6/p+ + control ASO vs. Ube3amΔe6/p+ + Snord115 ASO	0.3013
									Ube3amΔe6/p+ + Ube3a-as ASO vs. Ube3amΔe6/p+ + Snord115 ASO	0.8912
					25-50Hz				WT + control ASO vs. Ube3amΔe6/p+ + control ASO	0.5254
									WT + control ASO vs. Ube3amΔe6/p+ + Ube3a-as ASO	0.495
									WT + control ASO vs. Ube3amΔe6/p+ + Snord115 ASO	0.76
									Ube3amΔe6/p+ + control ASO vs. Ube3amΔe6/p+ + Ube3a-as ASO	0.2066
									Ube3amΔe6/p+ + control ASO vs. Ube3amΔe6/p+ + Snord115 ASO	0.9998
									Ube3amΔe6/p+ + Ube3a-as ASO vs. Ube3amΔe6/p+ + Snord115 ASO	0.2657
					50-100Hz				WT + control ASO vs. Ube3amΔe6/p+ + control ASO	0.0015
									WT + control ASO vs. Ube3amΔe6/p+ + Ube3a-as ASO	>0.9999
									WT + control ASO vs. Ube3amΔe6/p+ + Snord115 ASO	0.0966
									Ube3amΔe6/p+ + control ASO vs. Ube3amΔe6/p+ + Ube3a-as ASO	0.1815
									Ube3amΔe6/p+ + control ASO vs. Ube3amΔe6/p+ + Snord115 ASO	0.9401
									Ube3amΔe6/p+ + Ube3a-as ASO vs. Ube3amΔe6/p+ + Snord115 ASO	0.3952
Fig 5 S2A	EEG (PSD analysis: Relative band power)		10 weeks post ASO injection (p10wks)		1-4Hz	Two-way ANOVA (Tukey multiple comparison)	9/9/9/8	0.0623	WT + control ASO vs. Ube3amΔe6/p+ + control ASO	0.9212
									WT + control ASO vs. Ube3amΔe6/p+ + Ube3a-as ASO	0.5301
									WT + control ASO vs. Ube3amΔe6/p+ + Snord115 ASO	0.6161
									Ube3amΔe6/p+ + control ASO vs. Ube3amΔe6/p+ + Ube3a-as ASO	0.9542
									Ube3amΔe6/p+ + control ASO vs. Ube3amΔe6/p+ + Snord115 ASO	0.9806
									Ube3amΔe6/p+ + Ube3a-as ASO vs. Ube3amΔe6/p+ + Snord115 ASO	0.9984
					4-8Hz				WT + control ASO vs. Ube3amΔe6/p+ + control ASO	0.6267
									WT + control ASO vs. Ube3amΔe6/p+ + Ube3a-as ASO	0.7879
									WT + control ASO vs. Ube3amΔe6/p+ + Snord115 ASO	0.6767
									Ube3amΔe6/p+ + control ASO vs. Ube3amΔe6/p+ + Ube3a-as ASO	0.3084
									Ube3amΔe6/p+ + control ASO vs. Ube3amΔe6/p+ + Snord115 ASO	0.9999
									Ube3amΔe6/p+ + Ube3a-as ASO vs. Ube3amΔe6/p+ + Snord115 ASO	0.3485
					8-13Hz				WT + control ASO vs. Ube3amΔe6/p+ + control ASO	0.0104
									WT + control ASO vs. Ube3amΔe6/p+ + Ube3a-as ASO	0.9704
									WT + control ASO vs. Ube3amΔe6/p+ + Snord115 ASO	0.4351
									Ube3amΔe6/p+ + control ASO vs. Ube3amΔe6/p+ + Ube3a-as ASO	0.0403
									Ube3amΔe6/p+ + control ASO vs. Ube3amΔe6/p+ + Snord115 ASO	0.9428
									Ube3amΔe6/p+ + Ube3a-as ASO vs. Ube3amΔe6/p+ + Snord115 ASO	0.3734
					13-18Hz				WT + control ASO vs. Ube3amΔe6/p+ + control ASO	0.0828
									WT + control ASO vs. Ube3amΔe6/p+ + Ube3a-as ASO	0.9993
									WT + control ASO vs. Ube3amΔe6/p+ + Snord115 ASO	0.2358
									Ube3amΔe6/p+ + control ASO vs. Ube3amΔe6/p+ + Ube3a-as ASO	0.1383
									Ube3amΔe6/p+ + control ASO vs. Ube3amΔe6/p+ + Snord115 ASO	0.8504
									Ube3amΔe6/p+ + Ube3a-as ASO vs. Ube3amΔe6/p+ + Snord115 ASO	0.3638
					18-25Hz				WT + control ASO vs. Ube3amΔe6/p+ + control ASO	0.4366
									WT + control ASO vs. Ube3amΔe6/p+ + Ube3a-as ASO	0.9078
									WT + control ASO vs. Ube3amΔe6/p+ + Snord115 ASO	0.3903
									Ube3amΔe6/p+ + control ASO vs. Ube3amΔe6/p+ + Ube3a-as ASO	0.8625
									Ube3amΔe6/p+ + control ASO vs. Ube3amΔe6/p+ + Snord115 ASO	0.9994
									Ube3amΔe6/p+ + Ube3a-as ASO vs. Ube3amΔe6/p+ + Snord115 ASO	0.8116
					25-50Hz				WT + control ASO vs. Ube3amΔe6/p+ + control ASO	0.7888
									WT + control ASO vs. Ube3amΔe6/p+ + Ube3a-as ASO	0.3001
									WT + control ASO vs. Ube3amΔe6/p+ + Snord115 ASO	>0.9999
									Ube3amΔe6/p+ + control ASO vs. Ube3amΔe6/p+ + Ube3a-as ASO	0.1431
									Ube3amΔe6/p+ + control ASO vs. Ube3amΔe6/p+ + Snord115 ASO	0.918
									Ube3amΔe6/p+ + Ube3a-as ASO vs. Ube3amΔe6/p+ + Snord115 ASO	0.3805
					50-100Hz				WT + control ASO vs. Ube3amΔe6/p+ + control ASO	0.0899
									WT + control ASO vs. Ube3amΔe6/p+ + Ube3a-as ASO	0.9827
									WT + control ASO vs. Ube3amΔe6/p+ + Snord115 ASO	0.2531
									Ube3amΔe6/p+ + control ASO vs. Ube3amΔe6/p+ + Ube3a-as ASO	0.1769
									Ube3amΔe6/p+ + control ASO vs. Ube3amΔe6/p+ + Snord115 ASO	0.9677
									Ube3amΔe6/p+ + Ube3a-as ASO vs. Ube3amΔe6/p+ + Snord115 ASO	0.3157
Fig 5 S4B	EEG (PSD analysis: Relative band power)		3 weeks post ASO injection (p3wks)	Visual cortex	1-4Hz	Two-way ANOVA (Tukey multiple comparison)	9/9/9/8	0.7472	WT + control ASO vs. Ube3amΔe6/p+ + control ASO	0.9477
									WT + control ASO vs. Ube3amΔe6/p+ + Ube3a-as ASO	0.9027
									WT + control ASO vs. Ube3amΔe6/p+ + Snord115 ASO	0.9878
									Ube3amΔe6/p+ + control ASO vs. Ube3amΔe6/p+ + Ube3a-as ASO	0.9967
									Ube3amΔe6/p+ + control ASO vs. Ube3amΔe6/p+ + Snord115 ASO	0.9877
									Ube3amΔe6/p+ + Ube3a-as ASO vs. Ube3amΔe6/p+ + Snord115 ASO	0.9499
					4-8Hz				WT + control ASO vs. Ube3amΔe6/p+ + control ASO	0.9907
									WT + control ASO vs. Ube3amΔe6/p+ + Ube3a-as ASO	0.9967
									WT + control ASO vs. Ube3amΔe6/p+ + Snord115 ASO	>0.9999
									Ube3amΔe6/p+ + control ASO vs. Ube3amΔe6/p+ + Ube3a-as ASO	>0.9999
									Ube3amΔe6/p+ + control ASO vs. Ube3amΔe6/p+ + Snord115 ASO	0.9588
									Ube3amΔe6/p+ + Ube3a-as ASO vs. Ube3amΔe6/p+ + Snord115 ASO	0.9881
					8-13Hz				WT + control ASO vs. Ube3amΔe6/p+ + control ASO	0.9429
									WT + control ASO vs. Ube3amΔe6/p+ + Ube3a-as ASO	0.9731
									WT + control ASO vs. Ube3amΔe6/p+ + Snord115 ASO	0.9757
									Ube3amΔe6/p+ + control ASO vs. Ube3amΔe6/p+ + Ube3a-as ASO	0.8038
									Ube3amΔe6/p+ + control ASO vs. Ube3amΔe6/p+ + Snord115 ASO	0.8272
									Ube3amΔe6/p+ + Ube3a-as ASO vs. Ube3amΔe6/p+ + Snord115 ASO	>0.9999
					13-18Hz				WT + control ASO vs. Ube3amΔe6/p+ + control ASO	0.4952
									WT + control ASO vs. Ube3amΔe6/p+ + Ube3a-as ASO	0.5117
									WT + control ASO vs. Ube3amΔe6/p+ + Snord115 ASO	0.9981
									Ube3amΔe6/p+ + control ASO vs. Ube3amΔe6/p+ + Ube3a-as ASO	0.028
									Ube3amΔe6/p+ + control ASO vs. Ube3amΔe6/p+ + Snord115 ASO	0.3613
									Ube3amΔe6/p+ + Ube3a-as ASO vs. Ube3amΔe6/p+ + Snord115 ASO	0.577
					18-25Hz				WT + control ASO vs. Ube3amΔe6/p+ + control ASO	0.7942
									WT + control ASO vs. Ube3amΔe6/p+ + Ube3a-as ASO	0.9976
									WT + control ASO vs. Ube3amΔe6/p+ + Snord115 ASO	0.984
									Ube3amΔe6/p+ + control ASO vs. Ube3amΔe6/p+ + Ube3a-as ASO	0.4187
									Ube3amΔe6/p+ + control ASO vs. Ube3amΔe6/p+ + Snord115 ASO	0.737
									Ube3amΔe6/p+ + Ube3a-as ASO vs. Ube3amΔe6/p+ + Snord115 ASO	0.8598
					25-50Hz				WT + control ASO vs. Ube3amΔe6/p+ + control ASO	0.9996
									WT + control ASO vs. Ube3amΔe6/p+ + Ube3a-as ASO	0.5553
									WT + control ASO vs. Ube3amΔe6/p+ + Snord115 ASO	0.8828
									Ube3amΔe6/p+ + control ASO vs. Ube3amΔe6/p+ + Ube3a-as ASO	0.3473
									Ube3amΔe6/p+ + control ASO vs. Ube3amΔe6/p+ + Snord115 ASO	0.7175
									Ube3amΔe6/p+ + Ube3a-as ASO vs. Ube3amΔe6/p+ + Snord115 ASO	0.7903
					50-100Hz				WT + control ASO vs. Ube3amΔe6/p+ + control ASO	0.9391
									WT + control ASO vs. Ube3amΔe6/p+ + Ube3a-as ASO	0.9967
									WT + control ASO vs. Ube3amΔe6/p+ + Snord115 ASO	0.9972
									Ube3amΔe6/p+ + control ASO vs. Ube3amΔe6/p+ + Ube3a-as ASO	0.9813
									Ube3amΔe6/p+ + control ASO vs. Ube3amΔe6/p+ + Snord115 ASO	0.9437
									Ube3amΔe6/p+ + Ube3a-as ASO vs. Ube3amΔe6/p+ + Snord115 ASO	>0.9999
Fig 5 S4B	EEG (PSD analysis: Relative band power)		6 weeks post ASO injection (p6wks)		1-4Hz	Two-way ANOVA (Tukey multiple comparison)	9/9/9/8	0.2745	WT + control ASO vs. Ube3amΔe6/p+ + control ASO	0.9874
									WT + control ASO vs. Ube3amΔe6/p+ + Ube3a-as ASO	0.9862
									WT + control ASO vs. Ube3amΔe6/p+ + Snord115 ASO	0.9999
									Ube3amΔe6/p+ + control ASO vs. Ube3amΔe6/p+ + Ube3a-as ASO	>0.9999
									Ube3amΔe6/p+ + control ASO vs. Ube3amΔe6/p+ + Snord115 ASO	0.9191
									Ube3amΔe6/p+ + Ube3a-as ASO vs. Ube3amΔe6/p+ + Snord115 ASO	0.9282
					4-8Hz				WT + control ASO vs. Ube3amΔe6/p+ + control ASO	0.8827
									WT + control ASO vs. Ube3amΔe6/p+ + Ube3a-as ASO	0.9985
									WT + control ASO vs. Ube3amΔe6/p+ + Snord115 ASO	0.7172
									Ube3amΔe6/p+ + control ASO vs. Ube3amΔe6/p+ + Ube3a-as ASO	0.9463
									Ube3amΔe6/p+ + control ASO vs. Ube3amΔe6/p+ + Snord115 ASO	0.974
									Ube3amΔe6/p+ + Ube3a-as ASO vs. Ube3amΔe6/p+ + Snord115 ASO	0.8178
					8-13Hz				WT + control ASO vs. Ube3amΔe6/p+ + control ASO	0.827
									WT + control ASO vs. Ube3amΔe6/p+ + Ube3a-as ASO	0.8822
									WT + control ASO vs. Ube3amΔe6/p+ + Snord115 ASO	0.9999
									Ube3amΔe6/p+ + control ASO vs. Ube3amΔe6/p+ + Ube3a-as ASO	0.4987
									Ube3amΔe6/p+ + control ASO vs. Ube3amΔe6/p+ + Snord115 ASO	0.9101
									Ube3amΔe6/p+ + Ube3a-as ASO vs. Ube3amΔe6/p+ + Snord115 ASO	0.9138
					13-18Hz				WT + control ASO vs. Ube3amΔe6/p+ + control ASO	0.6304
									WT + control ASO vs. Ube3amΔe6/p+ + Ube3a-as ASO	0.6346
									WT + control ASO vs. Ube3amΔe6/p+ + Snord115 ASO	0.8317
									Ube3amΔe6/p+ + control ASO vs. Ube3amΔe6/p+ + Ube3a-as ASO	0.0105
									Ube3amΔe6/p+ + control ASO vs. Ube3amΔe6/p+ + Snord115 ASO	0.9704
									Ube3amΔe6/p+ + Ube3a-as ASO vs. Ube3amΔe6/p+ + Snord115 ASO	0.0544
					18-25Hz				WT + control ASO vs. Ube3amΔe6/p+ + control ASO	0.9402
									WT + control ASO vs. Ube3amΔe6/p+ + Ube3a-as ASO	>0.9999
									WT + control ASO vs. Ube3amΔe6/p+ + Snord115 ASO	0.9743
									Ube3amΔe6/p+ + control ASO vs. Ube3amΔe6/p+ + Ube3a-as ASO	0.818
									Ube3amΔe6/p+ + control ASO vs. Ube3amΔe6/p+ + Snord115 ASO	0.9915
									Ube3amΔe6/p+ + Ube3a-as ASO vs. Ube3amΔe6/p+ + Snord115 ASO	0.9142
					25-50Hz				WT + control ASO vs. Ube3amΔe6/p+ + control ASO	0.9965
									WT + control ASO vs. Ube3amΔe6/p+ + Ube3a-as ASO	0.6928
									WT + control ASO vs. Ube3amΔe6/p+ + Snord115 ASO	0.9973
									Ube3amΔe6/p+ + control ASO vs. Ube3amΔe6/p+ + Ube3a-as ASO	0.3521
									Ube3amΔe6/p+ + control ASO vs. Ube3amΔe6/p+ + Snord115 ASO	>0.9999
									Ube3amΔe6/p+ + Ube3a-as ASO vs. Ube3amΔe6/p+ + Snord115 ASO	0.3778
					50-100Hz				WT + control ASO vs. Ube3amΔe6/p+ + control ASO	0.7582
									WT + control ASO vs. Ube3amΔe6/p+ + Ube3a-as ASO	0.9943
									WT + control ASO vs. Ube3amΔe6/p+ + Snord115 ASO	0.5057
									Ube3amΔe6/p+ + control ASO vs. Ube3amΔe6/p+ + Ube3a-as ASO	0.8685
									Ube3amΔe6/p+ + control ASO vs. Ube3amΔe6/p+ + Snord115 ASO	0.9459
									Ube3amΔe6/p+ + Ube3a-as ASO vs. Ube3amΔe6/p+ + Snord115 ASO	0.6135
Fig 5 S4B	EEG (PSD analysis: Relative band power)		10 weeks post ASO injection (p10wks)		1-4Hz	Two-way ANOVA (Tukey multiple comparison)	9/9/9/8	0.6015	WT + control ASO vs. Ube3amΔe6/p+ + control ASO	0.8894
									WT + control ASO vs. Ube3amΔe6/p+ + Ube3a-as ASO	0.922
									WT + control ASO vs. Ube3amΔe6/p+ + Snord115 ASO	0.8151
									Ube3amΔe6/p+ + control ASO vs. Ube3amΔe6/p+ + Ube3a-as ASO	>0.9999
									Ube3amΔe6/p+ + control ASO vs. Ube3amΔe6/p+ + Snord115 ASO	0.9628
									Ube3amΔe6/p+ + Ube3a-as ASO vs. Ube3amΔe6/p+ + Snord115 ASO	0.9811
					4-8Hz				WT + control ASO vs. Ube3amΔe6/p+ + control ASO	0.7067
									WT + control ASO vs. Ube3amΔe6/p+ + Ube3a-as ASO	0.9999
									WT + control ASO vs. Ube3amΔe6/p+ + Snord115 ASO	0.8781
									Ube3amΔe6/p+ + control ASO vs. Ube3amΔe6/p+ + Ube3a-as ASO	0.7807
									Ube3amΔe6/p+ + control ASO vs. Ube3amΔe6/p+ + Snord115 ASO	0.9975
									Ube3amΔe6/p+ + Ube3a-as ASO vs. Ube3amΔe6/p+ + Snord115 ASO	0.9142
					8-13Hz				WT + control ASO vs. Ube3amΔe6/p+ + control ASO	0.5603
									WT + control ASO vs. Ube3amΔe6/p+ + Ube3a-as ASO	0.9754
									WT + control ASO vs. Ube3amΔe6/p+ + Snord115 ASO	0.9642
									Ube3amΔe6/p+ + control ASO vs. Ube3amΔe6/p+ + Ube3a-as ASO	0.7654
									Ube3amΔe6/p+ + control ASO vs. Ube3amΔe6/p+ + Snord115 ASO	0.8768
									Ube3amΔe6/p+ + Ube3a-as ASO vs. Ube3amΔe6/p+ + Snord115 ASO	0.9992
					13-18Hz				WT + control ASO vs. Ube3amΔe6/p+ + control ASO	0.4574
									WT + control ASO vs. Ube3amΔe6/p+ + Ube3a-as ASO	0.9966
									WT + control ASO vs. Ube3amΔe6/p+ + Snord115 ASO	0.5017
									Ube3amΔe6/p+ + control ASO vs. Ube3amΔe6/p+ + Ube3a-as ASO	0.0886
									Ube3amΔe6/p+ + control ASO vs. Ube3amΔe6/p+ + Snord115 ASO	0.9986
									Ube3amΔe6/p+ + Ube3a-as ASO vs. Ube3amΔe6/p+ + Snord115 ASO	0.1044
					18-25Hz				WT + control ASO vs. Ube3amΔe6/p+ + control ASO	0.9687
									WT + control ASO vs. Ube3amΔe6/p+ + Ube3a-as ASO	0.9938
									WT + control ASO vs. Ube3amΔe6/p+ + Snord115 ASO	0.7427
									Ube3amΔe6/p+ + control ASO vs. Ube3amΔe6/p+ + Ube3a-as ASO	0.9927
									Ube3amΔe6/p+ + control ASO vs. Ube3amΔe6/p+ + Snord115 ASO	0.5784
									Ube3amΔe6/p+ + Ube3a-as ASO vs. Ube3amΔe6/p+ + Snord115 ASO	0.6821
					25-50Hz				WT + control ASO vs. Ube3amΔe6/p+ + control ASO	0.9993
									WT + control ASO vs. Ube3amΔe6/p+ + Ube3a-as ASO	0.7719
									WT + control ASO vs. Ube3amΔe6/p+ + Snord115 ASO	0.9739
									Ube3amΔe6/p+ + control ASO vs. Ube3amΔe6/p+ + Ube3a-as ASO	0.4717
									Ube3amΔe6/p+ + control ASO vs. Ube3amΔe6/p+ + Snord115 ASO	0.8343
									Ube3amΔe6/p+ + Ube3a-as ASO vs. Ube3amΔe6/p+ + Snord115 ASO	0.8827
					50-100Hz				WT + control ASO vs. Ube3amΔe6/p+ + control ASO	0.7861
									WT + control ASO vs. Ube3amΔe6/p+ + Ube3a-as ASO	0.9956
									WT + control ASO vs. Ube3amΔe6/p+ + Snord115 ASO	0.8522
									Ube3amΔe6/p+ + control ASO vs. Ube3amΔe6/p+ + Ube3a-as ASO	0.8582
									Ube3amΔe6/p+ + control ASO vs. Ube3amΔe6/p+ + Snord115 ASO	0.9997
									Ube3amΔe6/p+ + Ube3a-as ASO vs. Ube3amΔe6/p+ + Snord115 ASO	0.918
Fig 5 S3B	EEG (PSD analysis: Relative band power)		3 weeks post ASO injection (p3wks)	Somatosensory cortex	1-4Hz	Two-way ANOVA (Tukey multiple comparison)	9/9/9/8	0.0938	WT + control ASO vs. Ube3amΔe6/p+ + control ASO	0.9316
									WT + control ASO vs. Ube3amΔe6/p+ + Ube3a-as ASO	0.9353
									WT + control ASO vs. Ube3amΔe6/p+ + Snord115 ASO	0.7936
									Ube3amΔe6/p+ + control ASO vs. Ube3amΔe6/p+ + Ube3a-as ASO	>0.9999
									Ube3amΔe6/p+ + control ASO vs. Ube3amΔe6/p+ + Snord115 ASO	0.9771
									Ube3amΔe6/p+ + Ube3a-as ASO vs. Ube3amΔe6/p+ + Snord115 ASO	0.9881
					4-8Hz				WT + control ASO vs. Ube3amΔe6/p+ + control ASO	0.1507
									WT + control ASO vs. Ube3amΔe6/p+ + Ube3a-as ASO	0.9995
									WT + control ASO vs. Ube3amΔe6/p+ + Snord115 ASO	0.7868
									Ube3amΔe6/p+ + control ASO vs. Ube3amΔe6/p+ + Ube3a-as ASO	0.2245
									Ube3amΔe6/p+ + control ASO vs. Ube3amΔe6/p+ + Snord115 ASO	0.9362
									Ube3amΔe6/p+ + Ube3a-as ASO vs. Ube3amΔe6/p+ + Snord115 ASO	0.8384
					8-13Hz				WT + control ASO vs. Ube3amΔe6/p+ + control ASO	0.1346
									WT + control ASO vs. Ube3amΔe6/p+ + Ube3a-as ASO	0.8792
									WT + control ASO vs. Ube3amΔe6/p+ + Snord115 ASO	0.4539
									Ube3amΔe6/p+ + control ASO vs. Ube3amΔe6/p+ + Ube3a-as ASO	0.009
									Ube3amΔe6/p+ + control ASO vs. Ube3amΔe6/p+ + Snord115 ASO	0.977
									Ube3amΔe6/p+ + Ube3a-as ASO vs. Ube3amΔe6/p+ + Snord115 ASO	0.136
					13-18Hz				WT + control ASO vs. Ube3amΔe6/p+ + control ASO	0.7967
									WT + control ASO vs. Ube3amΔe6/p+ + Ube3a-as ASO	0.5812
									WT + control ASO vs. Ube3amΔe6/p+ + Snord115 ASO	0.996
									Ube3amΔe6/p+ + control ASO vs. Ube3amΔe6/p+ + Ube3a-as ASO	0.0781
									Ube3amΔe6/p+ + control ASO vs. Ube3amΔe6/p+ + Snord115 ASO	0.6159
									Ube3amΔe6/p+ + Ube3a-as ASO vs. Ube3amΔe6/p+ + Snord115 ASO	0.6707
					18-25Hz				WT + control ASO vs. Ube3amΔe6/p+ + control ASO	0.8996
									WT + control ASO vs. Ube3amΔe6/p+ + Ube3a-as ASO	0.9982
									WT + control ASO vs. Ube3amΔe6/p+ + Snord115 ASO	0.9893
									Ube3amΔe6/p+ + control ASO vs. Ube3amΔe6/p+ + Ube3a-as ASO	0.9673
									Ube3amΔe6/p+ + control ASO vs. Ube3amΔe6/p+ + Snord115 ASO	0.8459
									Ube3amΔe6/p+ + Ube3a-as ASO vs. Ube3amΔe6/p+ + Snord115 ASO	0.9761
					25-50Hz				WT + control ASO vs. Ube3amΔe6/p+ + control ASO	0.2118
									WT + control ASO vs. Ube3amΔe6/p+ + Ube3a-as ASO	0.943
									WT + control ASO vs. Ube3amΔe6/p+ + Snord115 ASO	0.6864
									Ube3amΔe6/p+ + control ASO vs. Ube3amΔe6/p+ + Ube3a-as ASO	0.1713
									Ube3amΔe6/p+ + control ASO vs. Ube3amΔe6/p+ + Snord115 ASO	0.9785
									Ube3amΔe6/p+ + Ube3a-as ASO vs. Ube3amΔe6/p+ + Snord115 ASO	0.5111
					50-100Hz				WT + control ASO vs. Ube3amΔe6/p+ + control ASO	0.1381
									WT + control ASO vs. Ube3amΔe6/p+ + Ube3a-as ASO	0.9937
									WT + control ASO vs. Ube3amΔe6/p+ + Snord115 ASO	0.6174
									Ube3amΔe6/p+ + control ASO vs. Ube3amΔe6/p+ + Ube3a-as ASO	0.0416
									Ube3amΔe6/p+ + control ASO vs. Ube3amΔe6/p+ + Snord115 ASO	0.8804
									Ube3amΔe6/p+ + Ube3a-as ASO vs. Ube3amΔe6/p+ + Snord115 ASO	0.6231
Fig 5 S3B	EEG (PSD analysis: Relative band power)		6 weeks post ASO injection (p6wks)		1-4Hz	Two-way ANOVA (Tukey multiple comparison)	9/9/9/8	0.0219	WT + control ASO vs. Ube3amΔe6/p+ + control ASO	0.7559
									WT + control ASO vs. Ube3amΔe6/p+ + Ube3a-as ASO	0.8172
									WT + control ASO vs. Ube3amΔe6/p+ + Snord115 ASO	0.5078
									Ube3amΔe6/p+ + control ASO vs. Ube3amΔe6/p+ + Ube3a-as ASO	0.9926
									Ube3amΔe6/p+ + control ASO vs. Ube3amΔe6/p+ + Snord115 ASO	0.8996
									Ube3amΔe6/p+ + Ube3a-as ASO vs. Ube3amΔe6/p+ + Snord115 ASO	0.9925
					4-8Hz				WT + control ASO vs. Ube3amΔe6/p+ + control ASO	0.0229
									WT + control ASO vs. Ube3amΔe6/p+ + Ube3a-as ASO	0.9799
									WT + control ASO vs. Ube3amΔe6/p+ + Snord115 ASO	0.3284
									Ube3amΔe6/p+ + control ASO vs. Ube3amΔe6/p+ + Ube3a-as ASO	0.1354
									Ube3amΔe6/p+ + control ASO vs. Ube3amΔe6/p+ + Snord115 ASO	0.9908
									Ube3amΔe6/p+ + Ube3a-as ASO vs. Ube3amΔe6/p+ + Snord115 ASO	0.5341
					8-13Hz				WT + control ASO vs. Ube3amΔe6/p+ + control ASO	0.0178
									WT + control ASO vs. Ube3amΔe6/p+ + Ube3a-as ASO	0.6939
									WT + control ASO vs. Ube3amΔe6/p+ + Snord115 ASO	0.3581
									Ube3amΔe6/p+ + control ASO vs. Ube3amΔe6/p+ + Ube3a-as ASO	0.0026
									Ube3amΔe6/p+ + control ASO vs. Ube3amΔe6/p+ + Snord115 ASO	0.3509
									Ube3amΔe6/p+ + Ube3a-as ASO vs. Ube3amΔe6/p+ + Snord115 ASO	0.061
					13-18Hz				WT + control ASO vs. Ube3amΔe6/p+ + control ASO	0.4865
									WT + control ASO vs. Ube3amΔe6/p+ + Ube3a-as ASO	0.7103
									WT + control ASO vs. Ube3amΔe6/p+ + Snord115 ASO	0.9483
									Ube3amΔe6/p+ + control ASO vs. Ube3amΔe6/p+ + Ube3a-as ASO	0.1423
									Ube3amΔe6/p+ + control ASO vs. Ube3amΔe6/p+ + Snord115 ASO	0.9002
									Ube3amΔe6/p+ + Ube3a-as ASO vs. Ube3amΔe6/p+ + Snord115 ASO	0.5022
					18-25Hz				WT + control ASO vs. Ube3amΔe6/p+ + control ASO	0.972
									WT + control ASO vs. Ube3amΔe6/p+ + Ube3a-as ASO	>0.9999
									WT + control ASO vs. Ube3amΔe6/p+ + Snord115 ASO	0.9978
									Ube3amΔe6/p+ + control ASO vs. Ube3amΔe6/p+ + Ube3a-as ASO	0.9925
									Ube3amΔe6/p+ + control ASO vs. Ube3amΔe6/p+ + Snord115 ASO	0.9687
									Ube3amΔe6/p+ + Ube3a-as ASO vs. Ube3amΔe6/p+ + Snord115 ASO	0.9988
					25-50Hz				WT + control ASO vs. Ube3amΔe6/p+ + control ASO	0.0331
									WT + control ASO vs. Ube3amΔe6/p+ + Ube3a-as ASO	>0.9999
									WT + control ASO vs. Ube3amΔe6/p+ + Snord115 ASO	0.2454
									Ube3amΔe6/p+ + control ASO vs. Ube3amΔe6/p+ + Ube3a-as ASO	0.2555
									Ube3amΔe6/p+ + control ASO vs. Ube3amΔe6/p+ + Snord115 ASO	0.9969
									Ube3amΔe6/p+ + Ube3a-as ASO vs. Ube3amΔe6/p+ + Snord115 ASO	0.4671
					50-100Hz				WT + control ASO vs. Ube3amΔe6/p+ + control ASO	0.0151
									WT + control ASO vs. Ube3amΔe6/p+ + Ube3a-as ASO	0.9019
									WT + control ASO vs. Ube3amΔe6/p+ + Snord115 ASO	0.1075
									Ube3amΔe6/p+ + control ASO vs. Ube3amΔe6/p+ + Ube3a-as ASO	0.0511
									Ube3amΔe6/p+ + control ASO vs. Ube3amΔe6/p+ + Snord115 ASO	0.9779
									Ube3amΔe6/p+ + Ube3a-as ASO vs. Ube3amΔe6/p+ + Snord115 ASO	0.2806
Fig 5 S3B	EEG (PSD analysis: Relative band power)		10 weeks post ASO injection (p10wks)		1-4Hz	Two-way ANOVA (Tukey multiple comparison)	9/9/9/8	0.2364	WT + control ASO vs. Ube3amΔe6/p+ + control ASO	0.8619
									WT + control ASO vs. Ube3amΔe6/p+ + Ube3a-as ASO	0.8304
									WT + control ASO vs. Ube3amΔe6/p+ + Snord115 ASO	0.8025
									Ube3amΔe6/p+ + control ASO vs. Ube3amΔe6/p+ + Ube3a-as ASO	0.9673
									Ube3amΔe6/p+ + control ASO vs. Ube3amΔe6/p+ + Snord115 ASO	0.9876
									Ube3amΔe6/p+ + Ube3a-as ASO vs. Ube3amΔe6/p+ + Snord115 ASO	0.9967
					4-8Hz				WT + control ASO vs. Ube3amΔe6/p+ + control ASO	0.0775
									WT + control ASO vs. Ube3amΔe6/p+ + Ube3a-as ASO	0.9958
									WT + control ASO vs. Ube3amΔe6/p+ + Snord115 ASO	0.5681
									Ube3amΔe6/p+ + control ASO vs. Ube3amΔe6/p+ + Ube3a-as ASO	0.5393
									Ube3amΔe6/p+ + control ASO vs. Ube3amΔe6/p+ + Snord115 ASO	0.9889
									Ube3amΔe6/p+ + Ube3a-as ASO vs. Ube3amΔe6/p+ + Snord115 ASO	0.8303
					8-13Hz				WT + control ASO vs. Ube3amΔe6/p+ + control ASO	0.2814
									WT + control ASO vs. Ube3amΔe6/p+ + Ube3a-as ASO	0.5314
									WT + control ASO vs. Ube3amΔe6/p+ + Snord115 ASO	0.9129
									Ube3amΔe6/p+ + control ASO vs. Ube3amΔe6/p+ + Ube3a-as ASO	0.0732
									Ube3amΔe6/p+ + control ASO vs. Ube3amΔe6/p+ + Snord115 ASO	0.7457
									Ube3amΔe6/p+ + Ube3a-as ASO vs. Ube3amΔe6/p+ + Snord115 ASO	0.3323
					13-18Hz				WT + control ASO vs. Ube3amΔe6/p+ + control ASO	0.7509
									WT + control ASO vs. Ube3amΔe6/p+ + Ube3a-as ASO	0.219
									WT + control ASO vs. Ube3amΔe6/p+ + Snord115 ASO	0.9958
									Ube3amΔe6/p+ + control ASO vs. Ube3amΔe6/p+ + Ube3a-as ASO	0.0829
									Ube3amΔe6/p+ + control ASO vs. Ube3amΔe6/p+ + Snord115 ASO	0.9589
									Ube3amΔe6/p+ + Ube3a-as ASO vs. Ube3amΔe6/p+ + Snord115 ASO	0.329
					18-25Hz				WT + control ASO vs. Ube3amΔe6/p+ + control ASO	0.9103
									WT + control ASO vs. Ube3amΔe6/p+ + Ube3a-as ASO	0.905
									WT + control ASO vs. Ube3amΔe6/p+ + Snord115 ASO	0.9995
									Ube3amΔe6/p+ + control ASO vs. Ube3amΔe6/p+ + Ube3a-as ASO	0.7371
									Ube3amΔe6/p+ + control ASO vs. Ube3amΔe6/p+ + Snord115 ASO	0.9826
									Ube3amΔe6/p+ + Ube3a-as ASO vs. Ube3amΔe6/p+ + Snord115 ASO	0.9195
					25-50Hz				WT + control ASO vs. Ube3amΔe6/p+ + control ASO	0.1565
									WT + control ASO vs. Ube3amΔe6/p+ + Ube3a-as ASO	0.9998
									WT + control ASO vs. Ube3amΔe6/p+ + Snord115 ASO	0.5078
									Ube3amΔe6/p+ + control ASO vs. Ube3amΔe6/p+ + Ube3a-as ASO	0.7453
									Ube3amΔe6/p+ + control ASO vs. Ube3amΔe6/p+ + Snord115 ASO	0.9955
									Ube3amΔe6/p+ + Ube3a-as ASO vs. Ube3amΔe6/p+ + Snord115 ASO	0.8602
					50-100Hz				WT + control ASO vs. Ube3amΔe6/p+ + control ASO	0.006
									WT + control ASO vs. Ube3amΔe6/p+ + Ube3a-as ASO	0.9981
									WT + control ASO vs. Ube3amΔe6/p+ + Snord115 ASO	0.1926
									Ube3amΔe6/p+ + control ASO vs. Ube3amΔe6/p+ + Ube3a-as ASO	0.1391
									Ube3amΔe6/p+ + control ASO vs. Ube3amΔe6/p+ + Snord115 ASO	0.908
									Ube3amΔe6/p+ + Ube3a-as ASO vs. Ube3amΔe6/p+ + Snord115 ASO	0.4615
Fig 5 S2B	EEG (PSD analysis: Relative band power)	Adult	3 weeks post ASO injection (p3wks)	Frontal cortex	1-4Hz	Two-way ANOVA (Tukey multiple comparison)	7/7/7/7	0.0218	WT + control ASO vs. Ube3amΔe6/p+ + control ASO	0.7209
									WT + control ASO vs. Ube3amΔe6/p+ + Ube3a-as ASO	0.9918
									WT + control ASO vs. Ube3amΔe6/p+ + Snord115 ASO	0.9483
									Ube3amΔe6/p+ + control ASO vs. Ube3amΔe6/p+ + Ube3a-as ASO	0.9988
									Ube3amΔe6/p+ + control ASO vs. Ube3amΔe6/p+ + Snord115 ASO	0.6763
									Ube3amΔe6/p+ + Ube3a-as ASO vs. Ube3amΔe6/p+ + Snord115 ASO	0.9471
					4-8Hz				WT + control ASO vs. Ube3amΔe6/p+ + control ASO	0.0376
									WT + control ASO vs. Ube3amΔe6/p+ + Ube3a-as ASO	0.9919
									WT + control ASO vs. Ube3amΔe6/p+ + Snord115 ASO	0.9997
									Ube3amΔe6/p+ + control ASO vs. Ube3amΔe6/p+ + Ube3a-as ASO	0.2054
									Ube3amΔe6/p+ + control ASO vs. Ube3amΔe6/p+ + Snord115 ASO	0.081
									Ube3amΔe6/p+ + Ube3a-as ASO vs. Ube3amΔe6/p+ + Snord115 ASO	0.9873
					8-13Hz				WT + control ASO vs. Ube3amΔe6/p+ + control ASO	0.034
									WT + control ASO vs. Ube3amΔe6/p+ + Ube3a-as ASO	0.4289
									WT + control ASO vs. Ube3amΔe6/p+ + Snord115 ASO	0.9605
									Ube3amΔe6/p+ + control ASO vs. Ube3amΔe6/p+ + Ube3a-as ASO	0.3483
									Ube3amΔe6/p+ + control ASO vs. Ube3amΔe6/p+ + Snord115 ASO	0.0671
									Ube3amΔe6/p+ + Ube3a-as ASO vs. Ube3amΔe6/p+ + Snord115 ASO	0.6969
					13-18Hz				WT + control ASO vs. Ube3amΔe6/p+ + control ASO	0.0814
									WT + control ASO vs. Ube3amΔe6/p+ + Ube3a-as ASO	0.8632
									WT + control ASO vs. Ube3amΔe6/p+ + Snord115 ASO	0.2038
									Ube3amΔe6/p+ + control ASO vs. Ube3amΔe6/p+ + Ube3a-as ASO	0.5177
									Ube3amΔe6/p+ + control ASO vs. Ube3amΔe6/p+ + Snord115 ASO	0.299
									Ube3amΔe6/p+ + Ube3a-as ASO vs. Ube3amΔe6/p+ + Snord115 ASO	0.999
					18-25Hz				WT + control ASO vs. Ube3amΔe6/p+ + control ASO	0.1835
									WT + control ASO vs. Ube3amΔe6/p+ + Ube3a-as ASO	0.9997
									WT + control ASO vs. Ube3amΔe6/p+ + Snord115 ASO	0.1944
									Ube3amΔe6/p+ + control ASO vs. Ube3amΔe6/p+ + Ube3a-as ASO	0.7942
									Ube3amΔe6/p+ + control ASO vs. Ube3amΔe6/p+ + Snord115 ASO	0.9997
									Ube3amΔe6/p+ + Ube3a-as ASO vs. Ube3amΔe6/p+ + Snord115 ASO	0.7764
					25-50Hz				WT + control ASO vs. Ube3amΔe6/p+ + control ASO	0.0439
									WT + control ASO vs. Ube3amΔe6/p+ + Ube3a-as ASO	0.7778
									WT + control ASO vs. Ube3amΔe6/p+ + Snord115 ASO	>0.9999
									Ube3amΔe6/p+ + control ASO vs. Ube3amΔe6/p+ + Ube3a-as ASO	0.4419
									Ube3amΔe6/p+ + control ASO vs. Ube3amΔe6/p+ + Snord115 ASO	0.1557
									Ube3amΔe6/p+ + Ube3a-as ASO vs. Ube3amΔe6/p+ + Snord115 ASO	0.8754
					50-100Hz				WT + control ASO vs. Ube3amΔe6/p+ + control ASO	0.0087
									WT + control ASO vs. Ube3amΔe6/p+ + Ube3a-as ASO	0.8632
									WT + control ASO vs. Ube3amΔe6/p+ + Snord115 ASO	0.9763
									Ube3amΔe6/p+ + control ASO vs. Ube3amΔe6/p+ + Ube3a-as ASO	0.1818
									Ube3amΔe6/p+ + control ASO vs. Ube3amΔe6/p+ + Snord115 ASO	0.0505
									Ube3amΔe6/p+ + Ube3a-as ASO vs. Ube3amΔe6/p+ + Snord115 ASO	0.9802
Fig 5 S2B	EEG (PSD analysis: Relative band power)		6 weeks post ASO injection (p6wks)		1-4Hz	Two-way ANOVA (Tukey multiple comparison)	7/7/7/7	0.0065	WT + control ASO vs. Ube3amΔe6/p+ + control ASO	0.9543
									WT + control ASO vs. Ube3amΔe6/p+ + Ube3a-as ASO	>0.9999
									WT + control ASO vs. Ube3amΔe6/p+ + Snord115 ASO	0.4573
									Ube3amΔe6/p+ + control ASO vs. Ube3amΔe6/p+ + Ube3a-as ASO	0.9889
									Ube3amΔe6/p+ + control ASO vs. Ube3amΔe6/p+ + Snord115 ASO	0.3313
									Ube3amΔe6/p+ + Ube3a-as ASO vs. Ube3amΔe6/p+ + Snord115 ASO	0.8513
					4-8Hz				WT + control ASO vs. Ube3amΔe6/p+ + control ASO	0.0416
									WT + control ASO vs. Ube3amΔe6/p+ + Ube3a-as ASO	0.9994
									WT + control ASO vs. Ube3amΔe6/p+ + Snord115 ASO	0.6858
									Ube3amΔe6/p+ + control ASO vs. Ube3amΔe6/p+ + Ube3a-as ASO	0.1694
									Ube3amΔe6/p+ + control ASO vs. Ube3amΔe6/p+ + Snord115 ASO	0.1908
									Ube3amΔe6/p+ + Ube3a-as ASO vs. Ube3amΔe6/p+ + Snord115 ASO	0.8655
					8-13Hz				WT + control ASO vs. Ube3amΔe6/p+ + control ASO	0.0791
									WT + control ASO vs. Ube3amΔe6/p+ + Ube3a-as ASO	0.7652
									WT + control ASO vs. Ube3amΔe6/p+ + Snord115 ASO	0.0786
									Ube3amΔe6/p+ + control ASO vs. Ube3amΔe6/p+ + Ube3a-as ASO	0.4888
									Ube3amΔe6/p+ + control ASO vs. Ube3amΔe6/p+ + Snord115 ASO	0.3959
									Ube3amΔe6/p+ + Ube3a-as ASO vs. Ube3amΔe6/p+ + Snord115 ASO	0.9866
					13-18Hz				WT + control ASO vs. Ube3amΔe6/p+ + control ASO	0.1921
									WT + control ASO vs. Ube3amΔe6/p+ + Ube3a-as ASO	0.9913
									WT + control ASO vs. Ube3amΔe6/p+ + Snord115 ASO	0.0288
									Ube3amΔe6/p+ + control ASO vs. Ube3amΔe6/p+ + Ube3a-as ASO	0.4173
									Ube3amΔe6/p+ + control ASO vs. Ube3amΔe6/p+ + Snord115 ASO	0.9437
									Ube3amΔe6/p+ + Ube3a-as ASO vs. Ube3amΔe6/p+ + Snord115 ASO	0.4496
					18-25Hz				WT + control ASO vs. Ube3amΔe6/p+ + control ASO	0.3273
									WT + control ASO vs. Ube3amΔe6/p+ + Ube3a-as ASO	0.9818
									WT + control ASO vs. Ube3amΔe6/p+ + Snord115 ASO	0.161
									Ube3amΔe6/p+ + control ASO vs. Ube3amΔe6/p+ + Ube3a-as ASO	0.5928
									Ube3amΔe6/p+ + control ASO vs. Ube3amΔe6/p+ + Snord115 ASO	0.9017
									Ube3amΔe6/p+ + Ube3a-as ASO vs. Ube3amΔe6/p+ + Snord115 ASO	0.3593
					25-50Hz				WT + control ASO vs. Ube3amΔe6/p+ + control ASO	0.0421
									WT + control ASO vs. Ube3amΔe6/p+ + Ube3a-as ASO	0.9972
									WT + control ASO vs. Ube3amΔe6/p+ + Snord115 ASO	0.8567
									Ube3amΔe6/p+ + control ASO vs. Ube3amΔe6/p+ + Ube3a-as ASO	0.1394
									Ube3amΔe6/p+ + control ASO vs. Ube3amΔe6/p+ + Snord115 ASO	0.0743
									Ube3amΔe6/p+ + Ube3a-as ASO vs. Ube3amΔe6/p+ + Snord115 ASO	0.9724
					50-100Hz				WT + control ASO vs. Ube3amΔe6/p+ + control ASO	0.009
									WT + control ASO vs. Ube3amΔe6/p+ + Ube3a-as ASO	0.9807
									WT + control ASO vs. Ube3amΔe6/p+ + Snord115 ASO	0.3951
									Ube3amΔe6/p+ + control ASO vs. Ube3amΔe6/p+ + Ube3a-as ASO	0.1193
									Ube3amΔe6/p+ + control ASO vs. Ube3amΔe6/p+ + Snord115 ASO	0.0828
									Ube3amΔe6/p+ + Ube3a-as ASO vs. Ube3amΔe6/p+ + Snord115 ASO	0.8565
Fig 5 S2B	EEG (PSD analysis: Relative band power)		10 weeks post ASO injection (p10wks)		1-4Hz	Two-way ANOVA (Tukey multiple comparison)	7/7/7/7	0.0378	WT + control ASO vs. Ube3amΔe6/p+ + control ASO	0.9723
									WT + control ASO vs. Ube3amΔe6/p+ + Ube3a-as ASO	0.9995
									WT + control ASO vs. Ube3amΔe6/p+ + Snord115 ASO	0.7406
									Ube3amΔe6/p+ + control ASO vs. Ube3amΔe6/p+ + Ube3a-as ASO	0.9998
									Ube3amΔe6/p+ + control ASO vs. Ube3amΔe6/p+ + Snord115 ASO	0.5577
									Ube3amΔe6/p+ + Ube3a-as ASO vs. Ube3amΔe6/p+ + Snord115 ASO	0.9328
					4-8Hz				WT + control ASO vs. Ube3amΔe6/p+ + control ASO	0.0274
									WT + control ASO vs. Ube3amΔe6/p+ + Ube3a-as ASO	0.6186
									WT + control ASO vs. Ube3amΔe6/p+ + Snord115 ASO	0.1577
									Ube3amΔe6/p+ + control ASO vs. Ube3amΔe6/p+ + Ube3a-as ASO	0.7656
									Ube3amΔe6/p+ + control ASO vs. Ube3amΔe6/p+ + Snord115 ASO	0.7303
									Ube3amΔe6/p+ + Ube3a-as ASO vs. Ube3amΔe6/p+ + Snord115 ASO	0.9869
					8-13Hz				WT + control ASO vs. Ube3amΔe6/p+ + control ASO	0.0679
									WT + control ASO vs. Ube3amΔe6/p+ + Ube3a-as ASO	0.166
									WT + control ASO vs. Ube3amΔe6/p+ + Snord115 ASO	0.0068
									Ube3amΔe6/p+ + control ASO vs. Ube3amΔe6/p+ + Ube3a-as ASO	0.879
									Ube3amΔe6/p+ + control ASO vs. Ube3amΔe6/p+ + Snord115 ASO	0.7614
									Ube3amΔe6/p+ + Ube3a-as ASO vs. Ube3amΔe6/p+ + Snord115 ASO	0.9999
					13-18Hz				WT + control ASO vs. Ube3amΔe6/p+ + control ASO	0.1714
									WT + control ASO vs. Ube3amΔe6/p+ + Ube3a-as ASO	0.3777
									WT + control ASO vs. Ube3amΔe6/p+ + Snord115 ASO	0.0101
									Ube3amΔe6/p+ + control ASO vs. Ube3amΔe6/p+ + Ube3a-as ASO	0.9615
									Ube3amΔe6/p+ + control ASO vs. Ube3amΔe6/p+ + Snord115 ASO	0.9997
									Ube3amΔe6/p+ + Ube3a-as ASO vs. Ube3amΔe6/p+ + Snord115 ASO	0.9507
					18-25Hz				WT + control ASO vs. Ube3amΔe6/p+ + control ASO	0.361
									WT + control ASO vs. Ube3amΔe6/p+ + Ube3a-as ASO	0.9505
									WT + control ASO vs. Ube3amΔe6/p+ + Snord115 ASO	0.0636
									Ube3amΔe6/p+ + control ASO vs. Ube3amΔe6/p+ + Ube3a-as ASO	0.9781
									Ube3amΔe6/p+ + control ASO vs. Ube3amΔe6/p+ + Snord115 ASO	0.8215
									Ube3amΔe6/p+ + Ube3a-as ASO vs. Ube3amΔe6/p+ + Snord115 ASO	0.7914
					25-50Hz				WT + control ASO vs. Ube3amΔe6/p+ + control ASO	0.0531
									WT + control ASO vs. Ube3amΔe6/p+ + Ube3a-as ASO	0.6116
									WT + control ASO vs. Ube3amΔe6/p+ + Snord115 ASO	0.2954
									Ube3amΔe6/p+ + control ASO vs. Ube3amΔe6/p+ + Ube3a-as ASO	0.8943
									Ube3amΔe6/p+ + control ASO vs. Ube3amΔe6/p+ + Snord115 ASO	0.686
									Ube3amΔe6/p+ + Ube3a-as ASO vs. Ube3amΔe6/p+ + Snord115 ASO	>0.9999
					50-100Hz				WT + control ASO vs. Ube3amΔe6/p+ + control ASO	0.0071
									WT + control ASO vs. Ube3amΔe6/p+ + Ube3a-as ASO	0.2332
									WT + control ASO vs. Ube3amΔe6/p+ + Snord115 ASO	0.056
									Ube3amΔe6/p+ + control ASO vs. Ube3amΔe6/p+ + Ube3a-as ASO	0.7263
									Ube3amΔe6/p+ + control ASO vs. Ube3amΔe6/p+ + Snord115 ASO	0.5209
									Ube3amΔe6/p+ + Ube3a-as ASO vs. Ube3amΔe6/p+ + Snord115 ASO	>0.9999
Fig 5 S4E	EEG (PSD analysis: Relative band power)		3 weeks post ASO injection (p3wks)	Visual cortex	1-4Hz	Two-way ANOVA (Tukey multiple comparison)	7/7/7/7	0.7377	WT + control ASO vs. Ube3amΔe6/p+ + control ASO	0.9786
									WT + control ASO vs. Ube3amΔe6/p+ + Ube3a-as ASO	0.9595
									WT + control ASO vs. Ube3amΔe6/p+ + Snord115 ASO	0.9925
									Ube3amΔe6/p+ + control ASO vs. Ube3amΔe6/p+ + Ube3a-as ASO	0.897
									Ube3amΔe6/p+ + control ASO vs. Ube3amΔe6/p+ + Snord115 ASO	0.94
									Ube3amΔe6/p+ + Ube3a-as ASO vs. Ube3amΔe6/p+ + Snord115 ASO	0.9911
					4-8Hz				WT + control ASO vs. Ube3amΔe6/p+ + control ASO	0.9915
									WT + control ASO vs. Ube3amΔe6/p+ + Ube3a-as ASO	0.9843
									WT + control ASO vs. Ube3amΔe6/p+ + Snord115 ASO	0.9993
									Ube3amΔe6/p+ + control ASO vs. Ube3amΔe6/p+ + Ube3a-as ASO	>0.9999
									Ube3amΔe6/p+ + control ASO vs. Ube3amΔe6/p+ + Snord115 ASO	0.9988
									Ube3amΔe6/p+ + Ube3a-as ASO vs. Ube3amΔe6/p+ + Snord115 ASO	0.9976
					8-13Hz				WT + control ASO vs. Ube3amΔe6/p+ + control ASO	0.864
									WT + control ASO vs. Ube3amΔe6/p+ + Ube3a-as ASO	0.9352
									WT + control ASO vs. Ube3amΔe6/p+ + Snord115 ASO	0.9117
									Ube3amΔe6/p+ + control ASO vs. Ube3amΔe6/p+ + Ube3a-as ASO	0.35
									Ube3amΔe6/p+ + control ASO vs. Ube3amΔe6/p+ + Snord115 ASO	0.9986
									Ube3amΔe6/p+ + Ube3a-as ASO vs. Ube3amΔe6/p+ + Snord115 ASO	0.4102
					13-18Hz				WT + control ASO vs. Ube3amΔe6/p+ + control ASO	0.9912
									WT + control ASO vs. Ube3amΔe6/p+ + Ube3a-as ASO	0.9579
									WT + control ASO vs. Ube3amΔe6/p+ + Snord115 ASO	0.8728
									Ube3amΔe6/p+ + control ASO vs. Ube3amΔe6/p+ + Ube3a-as ASO	0.8526
									Ube3amΔe6/p+ + control ASO vs. Ube3amΔe6/p+ + Snord115 ASO	0.7157
									Ube3amΔe6/p+ + Ube3a-as ASO vs. Ube3amΔe6/p+ + Snord115 ASO	0.9937
					18-25Hz				WT + control ASO vs. Ube3amΔe6/p+ + control ASO	0.1232
									WT + control ASO vs. Ube3amΔe6/p+ + Ube3a-as ASO	0.9506
									WT + control ASO vs. Ube3amΔe6/p+ + Snord115 ASO	0.9327
									Ube3amΔe6/p+ + control ASO vs. Ube3amΔe6/p+ + Ube3a-as ASO	0.2004
									Ube3amΔe6/p+ + control ASO vs. Ube3amΔe6/p+ + Snord115 ASO	0.6796
									Ube3amΔe6/p+ + Ube3a-as ASO vs. Ube3amΔe6/p+ + Snord115 ASO	0.8235
					25-50Hz				WT + control ASO vs. Ube3amΔe6/p+ + control ASO	0.7689
									WT + control ASO vs. Ube3amΔe6/p+ + Ube3a-as ASO	>0.9999
									WT + control ASO vs. Ube3amΔe6/p+ + Snord115 ASO	0.9103
									Ube3amΔe6/p+ + control ASO vs. Ube3amΔe6/p+ + Ube3a-as ASO	0.8578
									Ube3amΔe6/p+ + control ASO vs. Ube3amΔe6/p+ + Snord115 ASO	0.9937
									Ube3amΔe6/p+ + Ube3a-as ASO vs. Ube3amΔe6/p+ + Snord115 ASO	0.95
					50-100Hz				WT + control ASO vs. Ube3amΔe6/p+ + control ASO	0.9924
									WT + control ASO vs. Ube3amΔe6/p+ + Ube3a-as ASO	0.8884
									WT + control ASO vs. Ube3amΔe6/p+ + Snord115 ASO	0.9718
									Ube3amΔe6/p+ + control ASO vs. Ube3amΔe6/p+ + Ube3a-as ASO	0.9868
									Ube3amΔe6/p+ + control ASO vs. Ube3amΔe6/p+ + Snord115 ASO	0.9996
									Ube3amΔe6/p+ + Ube3a-as ASO vs. Ube3amΔe6/p+ + Snord115 ASO	0.9942
Fig 5 S4E	EEG (PSD analysis: Relative band power)		6 weeks post ASO injection (p6wks)		1-4Hz	Two-way ANOVA (Tukey multiple comparison)	7/7/7/7	0.1323	WT + control ASO vs. Ube3amΔe6/p+ + control ASO	0.9984
									WT + control ASO vs. Ube3amΔe6/p+ + Ube3a-as ASO	0.9809
									WT + control ASO vs. Ube3amΔe6/p+ + Snord115 ASO	0.954
									Ube3amΔe6/p+ + control ASO vs. Ube3amΔe6/p+ + Ube3a-as ASO	0.9723
									Ube3amΔe6/p+ + control ASO vs. Ube3amΔe6/p+ + Snord115 ASO	0.9529
									Ube3amΔe6/p+ + Ube3a-as ASO vs. Ube3amΔe6/p+ + Snord115 ASO	>0.9999
					4-8Hz				WT + control ASO vs. Ube3amΔe6/p+ + control ASO	0.969
									WT + control ASO vs. Ube3amΔe6/p+ + Ube3a-as ASO	0.9599
									WT + control ASO vs. Ube3amΔe6/p+ + Snord115 ASO	0.3807
									Ube3amΔe6/p+ + control ASO vs. Ube3amΔe6/p+ + Ube3a-as ASO	>0.9999
									Ube3amΔe6/p+ + control ASO vs. Ube3amΔe6/p+ + Snord115 ASO	0.9047
									Ube3amΔe6/p+ + Ube3a-as ASO vs. Ube3amΔe6/p+ + Snord115 ASO	0.8118
					8-13Hz				WT + control ASO vs. Ube3amΔe6/p+ + control ASO	0.8338
									WT + control ASO vs. Ube3amΔe6/p+ + Ube3a-as ASO	0.7212
									WT + control ASO vs. Ube3amΔe6/p+ + Snord115 ASO	0.9583
									Ube3amΔe6/p+ + control ASO vs. Ube3amΔe6/p+ + Ube3a-as ASO	0.1312
									Ube3amΔe6/p+ + control ASO vs. Ube3amΔe6/p+ + Snord115 ASO	0.9767
									Ube3amΔe6/p+ + Ube3a-as ASO vs. Ube3amΔe6/p+ + Snord115 ASO	0.2577
					13-18Hz				WT + control ASO vs. Ube3amΔe6/p+ + control ASO	0.9355
									WT + control ASO vs. Ube3amΔe6/p+ + Ube3a-as ASO	0.9871
									WT + control ASO vs. Ube3amΔe6/p+ + Snord115 ASO	0.8843
									Ube3amΔe6/p+ + control ASO vs. Ube3amΔe6/p+ + Ube3a-as ASO	0.8229
									Ube3amΔe6/p+ + control ASO vs. Ube3amΔe6/p+ + Snord115 ASO	0.9994
									Ube3amΔe6/p+ + Ube3a-as ASO vs. Ube3amΔe6/p+ + Snord115 ASO	0.7433
					18-25Hz				WT + control ASO vs. Ube3amΔe6/p+ + control ASO	0.8436
									WT + control ASO vs. Ube3amΔe6/p+ + Ube3a-as ASO	0.8474
									WT + control ASO vs. Ube3amΔe6/p+ + Snord115 ASO	0.9735
									Ube3amΔe6/p+ + control ASO vs. Ube3amΔe6/p+ + Ube3a-as ASO	0.5858
									Ube3amΔe6/p+ + control ASO vs. Ube3amΔe6/p+ + Snord115 ASO	0.9858
									Ube3amΔe6/p+ + Ube3a-as ASO vs. Ube3amΔe6/p+ + Snord115 ASO	0.7699
					25-50Hz				WT + control ASO vs. Ube3amΔe6/p+ + control ASO	0.9354
									WT + control ASO vs. Ube3amΔe6/p+ + Ube3a-as ASO	0.9943
									WT + control ASO vs. Ube3amΔe6/p+ + Snord115 ASO	0.9896
									Ube3amΔe6/p+ + control ASO vs. Ube3amΔe6/p+ + Ube3a-as ASO	0.9193
									Ube3amΔe6/p+ + control ASO vs. Ube3amΔe6/p+ + Snord115 ASO	0.8922
									Ube3amΔe6/p+ + Ube3a-as ASO vs. Ube3amΔe6/p+ + Snord115 ASO	>0.9999
					50-100Hz				WT + control ASO vs. Ube3amΔe6/p+ + control ASO	0.9087
									WT + control ASO vs. Ube3amΔe6/p+ + Ube3a-as ASO	0.4593
									WT + control ASO vs. Ube3amΔe6/p+ + Snord115 ASO	0.1823
									Ube3amΔe6/p+ + control ASO vs. Ube3amΔe6/p+ + Ube3a-as ASO	0.9653
									Ube3amΔe6/p+ + control ASO vs. Ube3amΔe6/p+ + Snord115 ASO	0.8738
									Ube3amΔe6/p+ + Ube3a-as ASO vs. Ube3amΔe6/p+ + Snord115 ASO	0.9892
Fig 5 S4E	EEG (PSD analysis: Relative band power)		10 weeks post ASO injection (p10wks)		1-4Hz	Two-way ANOVA (Tukey multiple comparison)	7/7/7/7	0.0548	WT + control ASO vs. Ube3amΔe6/p+ + control ASO	0.9855
									WT + control ASO vs. Ube3amΔe6/p+ + Ube3a-as ASO	0.9272
									WT + control ASO vs. Ube3amΔe6/p+ + Snord115 ASO	0.96
									Ube3amΔe6/p+ + control ASO vs. Ube3amΔe6/p+ + Ube3a-as ASO	0.8781
									Ube3amΔe6/p+ + control ASO vs. Ube3amΔe6/p+ + Snord115 ASO	0.9142
									Ube3amΔe6/p+ + Ube3a-as ASO vs. Ube3amΔe6/p+ + Snord115 ASO	0.9813
					4-8Hz				WT + control ASO vs. Ube3amΔe6/p+ + control ASO	0.9946
									WT + control ASO vs. Ube3amΔe6/p+ + Ube3a-as ASO	0.2664
									WT + control ASO vs. Ube3amΔe6/p+ + Snord115 ASO	0.2579
									Ube3amΔe6/p+ + control ASO vs. Ube3amΔe6/p+ + Ube3a-as ASO	0.6474
									Ube3amΔe6/p+ + control ASO vs. Ube3amΔe6/p+ + Snord115 ASO	0.6971
									Ube3amΔe6/p+ + Ube3a-as ASO vs. Ube3amΔe6/p+ + Snord115 ASO	0.9977
					8-13Hz				WT + control ASO vs. Ube3amΔe6/p+ + control ASO	0.6956
									WT + control ASO vs. Ube3amΔe6/p+ + Ube3a-as ASO	0.9317
									WT + control ASO vs. Ube3amΔe6/p+ + Snord115 ASO	0.9789
									Ube3amΔe6/p+ + control ASO vs. Ube3amΔe6/p+ + Ube3a-as ASO	0.2274
									Ube3amΔe6/p+ + control ASO vs. Ube3amΔe6/p+ + Snord115 ASO	0.7988
									Ube3amΔe6/p+ + Ube3a-as ASO vs. Ube3amΔe6/p+ + Snord115 ASO	0.6528
					13-18Hz				WT + control ASO vs. Ube3amΔe6/p+ + control ASO	0.994
									WT + control ASO vs. Ube3amΔe6/p+ + Ube3a-as ASO	0.9877
									WT + control ASO vs. Ube3amΔe6/p+ + Snord115 ASO	0.7524
									Ube3amΔe6/p+ + control ASO vs. Ube3amΔe6/p+ + Ube3a-as ASO	0.965
									Ube3amΔe6/p+ + control ASO vs. Ube3amΔe6/p+ + Snord115 ASO	0.9527
									Ube3amΔe6/p+ + Ube3a-as ASO vs. Ube3amΔe6/p+ + Snord115 ASO	0.7082
					18-25Hz				WT + control ASO vs. Ube3amΔe6/p+ + control ASO	0.8485
									WT + control ASO vs. Ube3amΔe6/p+ + Ube3a-as ASO	0.6913
									WT + control ASO vs. Ube3amΔe6/p+ + Snord115 ASO	0.961
									Ube3amΔe6/p+ + control ASO vs. Ube3amΔe6/p+ + Ube3a-as ASO	0.428
									Ube3amΔe6/p+ + control ASO vs. Ube3amΔe6/p+ + Snord115 ASO	0.9795
									Ube3amΔe6/p+ + Ube3a-as ASO vs. Ube3amΔe6/p+ + Snord115 ASO	0.5242
					25-50Hz				WT + control ASO vs. Ube3amΔe6/p+ + control ASO	0.8414
									WT + control ASO vs. Ube3amΔe6/p+ + Ube3a-as ASO	0.7217
									WT + control ASO vs. Ube3amΔe6/p+ + Snord115 ASO	0.9411
									Ube3amΔe6/p+ + control ASO vs. Ube3amΔe6/p+ + Ube3a-as ASO	0.4583
									Ube3amΔe6/p+ + control ASO vs. Ube3amΔe6/p+ + Snord115 ASO	0.6468
									Ube3amΔe6/p+ + Ube3a-as ASO vs. Ube3amΔe6/p+ + Snord115 ASO	0.9293
					50-100Hz				WT + control ASO vs. Ube3amΔe6/p+ + control ASO	0.9879
									WT + control ASO vs. Ube3amΔe6/p+ + Ube3a-as ASO	0.2046
									WT + control ASO vs. Ube3amΔe6/p+ + Snord115 ASO	0.1954
									Ube3amΔe6/p+ + control ASO vs. Ube3amΔe6/p+ + Ube3a-as ASO	0.547
									Ube3amΔe6/p+ + control ASO vs. Ube3amΔe6/p+ + Snord115 ASO	0.6074
									Ube3amΔe6/p+ + Ube3a-as ASO vs. Ube3amΔe6/p+ + Snord115 ASO	0.9938
Fig 5 S3E	EEG (PSD analysis: Relative band power)		3 weeks post ASO injection (p3wks)	Somatosensory cortex	1-4Hz	Two-way ANOVA (Tukey multiple comparison)	7/7/7/7	0.2273	WT + control ASO vs. Ube3amΔe6/p+ + control ASO	0.7451
									WT + control ASO vs. Ube3amΔe6/p+ + Ube3a-as ASO	0.9175
									WT + control ASO vs. Ube3amΔe6/p+ + Snord115 ASO	0.8086
									Ube3amΔe6/p+ + control ASO vs. Ube3amΔe6/p+ + Ube3a-as ASO	0.9892
									Ube3amΔe6/p+ + control ASO vs. Ube3amΔe6/p+ + Snord115 ASO	0.9881
									Ube3amΔe6/p+ + Ube3a-as ASO vs. Ube3amΔe6/p+ + Snord115 ASO	0.9528
					4-8Hz				WT + control ASO vs. Ube3amΔe6/p+ + control ASO	0.3742
									WT + control ASO vs. Ube3amΔe6/p+ + Ube3a-as ASO	0.9034
									WT + control ASO vs. Ube3amΔe6/p+ + Snord115 ASO	0.7689
									Ube3amΔe6/p+ + control ASO vs. Ube3amΔe6/p+ + Ube3a-as ASO	0.7733
									Ube3amΔe6/p+ + control ASO vs. Ube3amΔe6/p+ + Snord115 ASO	0.9612
									Ube3amΔe6/p+ + Ube3a-as ASO vs. Ube3amΔe6/p+ + Snord115 ASO	0.9819
					8-13Hz				WT + control ASO vs. Ube3amΔe6/p+ + control ASO	0.9984
									WT + control ASO vs. Ube3amΔe6/p+ + Ube3a-as ASO	0.9724
									WT + control ASO vs. Ube3amΔe6/p+ + Snord115 ASO	0.8659
									Ube3amΔe6/p+ + control ASO vs. Ube3amΔe6/p+ + Ube3a-as ASO	0.9854
									Ube3amΔe6/p+ + control ASO vs. Ube3amΔe6/p+ + Snord115 ASO	0.8003
									Ube3amΔe6/p+ + Ube3a-as ASO vs. Ube3amΔe6/p+ + Snord115 ASO	0.7639
					13-18Hz				WT + control ASO vs. Ube3amΔe6/p+ + control ASO	0.6186
									WT + control ASO vs. Ube3amΔe6/p+ + Ube3a-as ASO	0.9994
									WT + control ASO vs. Ube3amΔe6/p+ + Snord115 ASO	0.9691
									Ube3amΔe6/p+ + control ASO vs. Ube3amΔe6/p+ + Ube3a-as ASO	0.7537
									Ube3amΔe6/p+ + control ASO vs. Ube3amΔe6/p+ + Snord115 ASO	0.6166
									Ube3amΔe6/p+ + Ube3a-as ASO vs. Ube3amΔe6/p+ + Snord115 ASO	0.9562
					18-25Hz				WT + control ASO vs. Ube3amΔe6/p+ + control ASO	0.716
									WT + control ASO vs. Ube3amΔe6/p+ + Ube3a-as ASO	0.9876
									WT + control ASO vs. Ube3amΔe6/p+ + Snord115 ASO	>0.9999
									Ube3amΔe6/p+ + control ASO vs. Ube3amΔe6/p+ + Ube3a-as ASO	0.9208
									Ube3amΔe6/p+ + control ASO vs. Ube3amΔe6/p+ + Snord115 ASO	0.9023
									Ube3amΔe6/p+ + Ube3a-as ASO vs. Ube3amΔe6/p+ + Snord115 ASO	0.996
					25-50Hz				WT + control ASO vs. Ube3amΔe6/p+ + control ASO	0.5118
									WT + control ASO vs. Ube3amΔe6/p+ + Ube3a-as ASO	0.8853
									WT + control ASO vs. Ube3amΔe6/p+ + Snord115 ASO	0.7733
									Ube3amΔe6/p+ + control ASO vs. Ube3amΔe6/p+ + Ube3a-as ASO	0.9094
									Ube3amΔe6/p+ + control ASO vs. Ube3amΔe6/p+ + Snord115 ASO	0.9959
									Ube3amΔe6/p+ + Ube3a-as ASO vs. Ube3amΔe6/p+ + Snord115 ASO	0.984
					50-100Hz				WT + control ASO vs. Ube3amΔe6/p+ + control ASO	0.0407
									WT + control ASO vs. Ube3amΔe6/p+ + Ube3a-as ASO	0.6214
									WT + control ASO vs. Ube3amΔe6/p+ + Snord115 ASO	0.6128
									Ube3amΔe6/p+ + control ASO vs. Ube3amΔe6/p+ + Ube3a-as ASO	0.6237
									Ube3amΔe6/p+ + control ASO vs. Ube3amΔe6/p+ + Snord115 ASO	0.7444
									Ube3amΔe6/p+ + Ube3a-as ASO vs. Ube3amΔe6/p+ + Snord115 ASO	0.9995
Fig 5 S3E	EEG (PSD analysis: Relative band power)		6 weeks post ASO injection (p6wks)		1-4Hz	Two-way ANOVA (Tukey multiple comparison)	7/7/7/7	0.0808	WT + control ASO vs. Ube3amΔe6/p+ + control ASO	0.9501
									WT + control ASO vs. Ube3amΔe6/p+ + Ube3a-as ASO	0.9992
									WT + control ASO vs. Ube3amΔe6/p+ + Snord115 ASO	0.9279
									Ube3amΔe6/p+ + control ASO vs. Ube3amΔe6/p+ + Ube3a-as ASO	0.9413
									Ube3amΔe6/p+ + control ASO vs. Ube3amΔe6/p+ + Snord115 ASO	0.9964
									Ube3amΔe6/p+ + Ube3a-as ASO vs. Ube3amΔe6/p+ + Snord115 ASO	0.9173
					4-8Hz				WT + control ASO vs. Ube3amΔe6/p+ + control ASO	0.4311
									WT + control ASO vs. Ube3amΔe6/p+ + Ube3a-as ASO	0.9832
									WT + control ASO vs. Ube3amΔe6/p+ + Snord115 ASO	0.3518
									Ube3amΔe6/p+ + control ASO vs. Ube3amΔe6/p+ + Ube3a-as ASO	0.6276
									Ube3amΔe6/p+ + control ASO vs. Ube3amΔe6/p+ + Snord115 ASO	>0.9999
									Ube3amΔe6/p+ + Ube3a-as ASO vs. Ube3amΔe6/p+ + Snord115 ASO	0.5584
					8-13Hz				WT + control ASO vs. Ube3amΔe6/p+ + control ASO	0.7722
									WT + control ASO vs. Ube3amΔe6/p+ + Ube3a-as ASO	0.8946
									WT + control ASO vs. Ube3amΔe6/p+ + Snord115 ASO	0.9945
									Ube3amΔe6/p+ + control ASO vs. Ube3amΔe6/p+ + Ube3a-as ASO	0.587
									Ube3amΔe6/p+ + control ASO vs. Ube3amΔe6/p+ + Snord115 ASO	0.9904
									Ube3amΔe6/p+ + Ube3a-as ASO vs. Ube3amΔe6/p+ + Snord115 ASO	0.8749
					13-18Hz				WT + control ASO vs. Ube3amΔe6/p+ + control ASO	0.7592
									WT + control ASO vs. Ube3amΔe6/p+ + Ube3a-as ASO	>0.9999
									WT + control ASO vs. Ube3amΔe6/p+ + Snord115 ASO	0.9798
									Ube3amΔe6/p+ + control ASO vs. Ube3amΔe6/p+ + Ube3a-as ASO	0.8436
									Ube3amΔe6/p+ + control ASO vs. Ube3amΔe6/p+ + Snord115 ASO	0.9886
									Ube3amΔe6/p+ + Ube3a-as ASO vs. Ube3amΔe6/p+ + Snord115 ASO	0.9824
					18-25Hz				WT + control ASO vs. Ube3amΔe6/p+ + control ASO	0.7689
									WT + control ASO vs. Ube3amΔe6/p+ + Ube3a-as ASO	0.9727
									WT + control ASO vs. Ube3amΔe6/p+ + Snord115 ASO	0.9692
									Ube3amΔe6/p+ + control ASO vs. Ube3amΔe6/p+ + Ube3a-as ASO	0.9538
									Ube3amΔe6/p+ + control ASO vs. Ube3amΔe6/p+ + Snord115 ASO	0.994
									Ube3amΔe6/p+ + Ube3a-as ASO vs. Ube3amΔe6/p+ + Snord115 ASO	0.9988
					25-50Hz				WT + control ASO vs. Ube3amΔe6/p+ + control ASO	0.7538
									WT + control ASO vs. Ube3amΔe6/p+ + Ube3a-as ASO	>0.9999
									WT + control ASO vs. Ube3amΔe6/p+ + Snord115 ASO	0.5325
									Ube3amΔe6/p+ + control ASO vs. Ube3amΔe6/p+ + Ube3a-as ASO	0.8135
									Ube3amΔe6/p+ + control ASO vs. Ube3amΔe6/p+ + Snord115 ASO	0.9898
									Ube3amΔe6/p+ + Ube3a-as ASO vs. Ube3amΔe6/p+ + Snord115 ASO	0.6293
					50-100Hz				WT + control ASO vs. Ube3amΔe6/p+ + control ASO	0.2054
									WT + control ASO vs. Ube3amΔe6/p+ + Ube3a-as ASO	0.8807
									WT + control ASO vs. Ube3amΔe6/p+ + Snord115 ASO	0.1107
									Ube3amΔe6/p+ + control ASO vs. Ube3amΔe6/p+ + Ube3a-as ASO	0.6667
									Ube3amΔe6/p+ + control ASO vs. Ube3amΔe6/p+ + Snord115 ASO	>0.9999
									Ube3amΔe6/p+ + Ube3a-as ASO vs. Ube3amΔe6/p+ + Snord115 ASO	0.5766
Fig 5 S3E	EEG (PSD analysis: Relative band power)		10 weeks post ASO injection (p10wks)		1-4Hz	Two-way ANOVA (Tukey multiple comparison)	7/7/7/7	0.0144	WT + control ASO vs. Ube3amΔe6/p+ + control ASO	0.8704
									WT + control ASO vs. Ube3amΔe6/p+ + Ube3a-as ASO	0.9653
									WT + control ASO vs. Ube3amΔe6/p+ + Snord115 ASO	0.7693
									Ube3amΔe6/p+ + control ASO vs. Ube3amΔe6/p+ + Ube3a-as ASO	0.9904
									Ube3amΔe6/p+ + control ASO vs. Ube3amΔe6/p+ + Snord115 ASO	0.971
									Ube3amΔe6/p+ + Ube3a-as ASO vs. Ube3amΔe6/p+ + Snord115 ASO	0.9108
					4-8Hz				WT + control ASO vs. Ube3amΔe6/p+ + control ASO	0.2022
									WT + control ASO vs. Ube3amΔe6/p+ + Ube3a-as ASO	0.3081
									WT + control ASO vs. Ube3amΔe6/p+ + Snord115 ASO	0.0792
									Ube3amΔe6/p+ + control ASO vs. Ube3amΔe6/p+ + Ube3a-as ASO	0.9776
									Ube3amΔe6/p+ + control ASO vs. Ube3amΔe6/p+ + Snord115 ASO	0.963
									Ube3amΔe6/p+ + Ube3a-as ASO vs. Ube3amΔe6/p+ + Snord115 ASO	0.7992
					8-13Hz				WT + control ASO vs. Ube3amΔe6/p+ + control ASO	0.9977
									WT + control ASO vs. Ube3amΔe6/p+ + Ube3a-as ASO	0.5863
									WT + control ASO vs. Ube3amΔe6/p+ + Snord115 ASO	0.9956
									Ube3amΔe6/p+ + control ASO vs. Ube3amΔe6/p+ + Ube3a-as ASO	0.4408
									Ube3amΔe6/p+ + control ASO vs. Ube3amΔe6/p+ + Snord115 ASO	0.9836
									Ube3amΔe6/p+ + Ube3a-as ASO vs. Ube3amΔe6/p+ + Snord115 ASO	0.8719
					13-18Hz				WT + control ASO vs. Ube3amΔe6/p+ + control ASO	0.6568
									WT + control ASO vs. Ube3amΔe6/p+ + Ube3a-as ASO	0.7506
									WT + control ASO vs. Ube3amΔe6/p+ + Snord115 ASO	0.9141
									Ube3amΔe6/p+ + control ASO vs. Ube3amΔe6/p+ + Ube3a-as ASO	>0.9999
									Ube3amΔe6/p+ + control ASO vs. Ube3amΔe6/p+ + Snord115 ASO	0.9979
									Ube3amΔe6/p+ + Ube3a-as ASO vs. Ube3amΔe6/p+ + Snord115 ASO	0.9985
					18-25Hz				WT + control ASO vs. Ube3amΔe6/p+ + control ASO	0.7175
									WT + control ASO vs. Ube3amΔe6/p+ + Ube3a-as ASO	0.7974
									WT + control ASO vs. Ube3amΔe6/p+ + Snord115 ASO	0.9653
									Ube3amΔe6/p+ + control ASO vs. Ube3amΔe6/p+ + Ube3a-as ASO	0.9915
									Ube3amΔe6/p+ + control ASO vs. Ube3amΔe6/p+ + Snord115 ASO	0.9849
									Ube3amΔe6/p+ + Ube3a-as ASO vs. Ube3amΔe6/p+ + Snord115 ASO	0.999
					25-50Hz				WT + control ASO vs. Ube3amΔe6/p+ + control ASO	0.6625
									WT + control ASO vs. Ube3amΔe6/p+ + Ube3a-as ASO	0.6447
									WT + control ASO vs. Ube3amΔe6/p+ + Snord115 ASO	0.1762
									Ube3amΔe6/p+ + control ASO vs. Ube3amΔe6/p+ + Ube3a-as ASO	>0.9999
									Ube3amΔe6/p+ + control ASO vs. Ube3amΔe6/p+ + Snord115 ASO	0.7753
									Ube3amΔe6/p+ + Ube3a-as ASO vs. Ube3amΔe6/p+ + Snord115 ASO	0.7928
					50-100Hz				WT + control ASO vs. Ube3amΔe6/p+ + control ASO	0.0467
									WT + control ASO vs. Ube3amΔe6/p+ + Ube3a-as ASO	0.0874
									WT + control ASO vs. Ube3amΔe6/p+ + Snord115 ASO	0.0104
									Ube3amΔe6/p+ + control ASO vs. Ube3amΔe6/p+ + Ube3a-as ASO	0.9988
									Ube3amΔe6/p+ + control ASO vs. Ube3amΔe6/p+ + Snord115 ASO	0.9244
									Ube3amΔe6/p+ + Ube3a-as ASO vs. Ube3amΔe6/p+ + Snord115 ASO	0.8846

## Sheet: EEG-PSD band ratio
Figure	Experiment	ASO injection age	Timepoints after ASO injection	Brain region	Statistical test	n (mouse): WT + control ASO / Ube3amΔe6/p+ + control ASO / Ube3amΔe6/p+ + Ube3a-as ASO / Ube3amΔe6/p+ + Snord115 ASO	P value (summary)	Multiple comparison
								Genotype pair	P value
Fig 5E	EEG (PSD analysis: Band ratio)	Juvenile	3 weeks post ASO injection (p3wks)	Frontal cortex	Kruskal Wallis test (Dunn's multiple comparison)	9/9/9/8	0.0039	WT + control ASO vs. Ube3amΔe6/p+ + control ASO	0.0105
								WT + control ASO vs. Ube3amΔe6/p+ + Ube3a-as ASO	>0.9999
								WT + control ASO vs. Ube3amΔe6/p+ + Snord115 ASO	>0.9999
								Ube3amΔe6/p+ + control ASO vs. Ube3amΔe6/p+ + Ube3a-as ASO	0.0083
								Ube3amΔe6/p+ + control ASO vs. Ube3amΔe6/p+ + Snord115 ASO	0.2262
								Ube3amΔe6/p+ + Ube3a-as ASO vs. Ube3amΔe6/p+ + Snord115 ASO	>0.9999
Fig 5E	EEG (PSD analysis: relative band power)		6 weeks post ASO injection (p6wks)		Kruskal Wallis test (Dunn's multiple comparison)	9/9/9/8	0.0005	WT + control ASO vs. Ube3amΔe6/p+ + control ASO	0.002
								WT + control ASO vs. Ube3amΔe6/p+ + Ube3a-as ASO	>0.9999
								WT + control ASO vs. Ube3amΔe6/p+ + Snord115 ASO	0.0668
								Ube3amΔe6/p+ + control ASO vs. Ube3amΔe6/p+ + Ube3a-as ASO	0.0098
								Ube3amΔe6/p+ + control ASO vs. Ube3amΔe6/p+ + Snord115 ASO	>0.9999
								Ube3amΔe6/p+ + Ube3a-as ASO vs. Ube3amΔe6/p+ + Snord115 ASO	0.2069
Fig 5E	EEG (PSD analysis: relative band power)		10 weeks post ASO injection (p10wks)		Kruskal Wallis test (Dunn's multiple comparison)	9/9/9/8	0.01	WT + control ASO vs. Ube3amΔe6/p+ + control ASO	0.0301
								WT + control ASO vs. Ube3amΔe6/p+ + Ube3a-as ASO	>0.9999
								WT + control ASO vs. Ube3amΔe6/p+ + Snord115 ASO	0.2127
								Ube3amΔe6/p+ + control ASO vs. Ube3amΔe6/p+ + Ube3a-as ASO	0.0684
								Ube3amΔe6/p+ + control ASO vs. Ube3amΔe6/p+ + Snord115 ASO	>0.9999
								Ube3amΔe6/p+ + Ube3a-as ASO vs. Ube3amΔe6/p+ + Snord115 ASO	0.3986
Fig 5 S4C	EEG (PSD analysis: relative band power)		3 weeks post ASO injection (p3wks)	Visual cortex	Kruskal Wallis test (Dunn's multiple comparison)	9/9/9/8	0.7252	WT + control ASO vs. Ube3amΔe6/p+ + control ASO	>0.9999
								WT + control ASO vs. Ube3amΔe6/p+ + Ube3a-as ASO	>0.9999
								WT + control ASO vs. Ube3amΔe6/p+ + Snord115 ASO	>0.9999
								Ube3amΔe6/p+ + control ASO vs. Ube3amΔe6/p+ + Ube3a-as ASO	>0.9999
								Ube3amΔe6/p+ + control ASO vs. Ube3amΔe6/p+ + Snord115 ASO	>0.9999
								Ube3amΔe6/p+ + Ube3a-as ASO vs. Ube3amΔe6/p+ + Snord115 ASO	>0.9999
Fig 5 S4C	EEG (PSD analysis: relative band power)		6 weeks post ASO injection (p6wks)		Kruskal Wallis test (Dunn's multiple comparison)	9/9/9/8	0.3795	WT + control ASO vs. Ube3amΔe6/p+ + control ASO	>0.9999
								WT + control ASO vs. Ube3amΔe6/p+ + Ube3a-as ASO	>0.9999
								WT + control ASO vs. Ube3amΔe6/p+ + Snord115 ASO	>0.9999
								Ube3amΔe6/p+ + control ASO vs. Ube3amΔe6/p+ + Ube3a-as ASO	>0.9999
								Ube3amΔe6/p+ + control ASO vs. Ube3amΔe6/p+ + Snord115 ASO	>0.9999
								Ube3amΔe6/p+ + Ube3a-as ASO vs. Ube3amΔe6/p+ + Snord115 ASO	>0.9999
Fig 5 S4C	EEG (PSD analysis: relative band power)		10 weeks post ASO injection (p10wks)		Kruskal Wallis test (Dunn's multiple comparison)	9/9/9/8	0.6045	WT + control ASO vs. Ube3amΔe6/p+ + control ASO	>0.9999
								WT + control ASO vs. Ube3amΔe6/p+ + Ube3a-as ASO	>0.9999
								WT + control ASO vs. Ube3amΔe6/p+ + Snord115 ASO	>0.9999
								Ube3amΔe6/p+ + control ASO vs. Ube3amΔe6/p+ + Ube3a-as ASO	>0.9999
								Ube3amΔe6/p+ + control ASO vs. Ube3amΔe6/p+ + Snord115 ASO	>0.9999
								Ube3amΔe6/p+ + Ube3a-as ASO vs. Ube3amΔe6/p+ + Snord115 ASO	>0.9999
Fig 5 S3C	EEG (PSD analysis: relative band power)		3 weeks post ASO injection (p3wks)	Somatosensory cortex	Kruskal Wallis test (Dunn's multiple comparison)	9/9/9/8	0.0231	WT + control ASO vs. Ube3amΔe6/p+ + control ASO	0.206
								WT + control ASO vs. Ube3amΔe6/p+ + Ube3a-as ASO	>0.9999
								WT + control ASO vs. Ube3amΔe6/p+ + Snord115 ASO	0.8539
								Ube3amΔe6/p+ + control ASO vs. Ube3amΔe6/p+ + Ube3a-as ASO	0.0399
								Ube3amΔe6/p+ + control ASO vs. Ube3amΔe6/p+ + Snord115 ASO	>0.9999
								Ube3amΔe6/p+ + Ube3a-as ASO vs. Ube3amΔe6/p+ + Snord115 ASO	0.2437
Fig 5 S3C	EEG (PSD analysis: relative band power)		6 weeks post ASO injection (p6wks)		Kruskal Wallis test (Dunn's multiple comparison)	9/9/9/8	0.0009	WT + control ASO vs. Ube3amΔe6/p+ + control ASO	0.0077
								WT + control ASO vs. Ube3amΔe6/p+ + Ube3a-as ASO	>0.9999
								WT + control ASO vs. Ube3amΔe6/p+ + Snord115 ASO	0.0588
								Ube3amΔe6/p+ + control ASO vs. Ube3amΔe6/p+ + Ube3a-as ASO	0.0123
								Ube3amΔe6/p+ + control ASO vs. Ube3amΔe6/p+ + Snord115 ASO	>0.9999
								Ube3amΔe6/p+ + Ube3a-as ASO vs. Ube3amΔe6/p+ + Snord115 ASO	0.0859
Fig 5 S3C	EEG (PSD analysis: relative band power)		10 weeks post ASO injection (p10wks)		Kruskal Wallis test (Dunn's multiple comparison)	9/9/9/8	0.0027	WT + control ASO vs. Ube3amΔe6/p+ + control ASO	0.018
								WT + control ASO vs. Ube3amΔe6/p+ + Ube3a-as ASO	>0.9999
								WT + control ASO vs. Ube3amΔe6/p+ + Snord115 ASO	0.175
								Ube3amΔe6/p+ + control ASO vs. Ube3amΔe6/p+ + Ube3a-as ASO	0.0155
								Ube3amΔe6/p+ + control ASO vs. Ube3amΔe6/p+ + Snord115 ASO	>0.9999
								Ube3amΔe6/p+ + Ube3a-as ASO vs. Ube3amΔe6/p+ + Snord115 ASO	0.1561
Fig 5I	EEG (PSD analysis: relative band power)	Adult	3 weeks post ASO injection (p3wks)	Frontal cortex	Kruskal Wallis test (Dunn's multiple comparison)	7/7/7/7	0.007	WT + control ASO vs. Ube3amΔe6/p+ + control ASO	0.0055
								WT + control ASO vs. Ube3amΔe6/p+ + Ube3a-as ASO	>0.9999
								WT + control ASO vs. Ube3amΔe6/p+ + Snord115 ASO	>0.9999
								Ube3amΔe6/p+ + control ASO vs. Ube3amΔe6/p+ + Ube3a-as ASO	0.2082
								Ube3amΔe6/p+ + control ASO vs. Ube3amΔe6/p+ + Snord115 ASO	0.0616
								Ube3amΔe6/p+ + Ube3a-as ASO vs. Ube3amΔe6/p+ + Snord115 ASO	>0.9999
Fig 5I	EEG (PSD analysis: relative band power)		6 weeks post ASO injection (p6wks)		Kruskal Wallis test (Dunn's multiple comparison)	7/7/7/8	0.0052	WT + control ASO vs. Ube3amΔe6/p+ + control ASO	0.0062
								WT + control ASO vs. Ube3amΔe6/p+ + Ube3a-as ASO	>0.9999
								WT + control ASO vs. Ube3amΔe6/p+ + Snord115 ASO	0.5105
								Ube3amΔe6/p+ + control ASO vs. Ube3amΔe6/p+ + Ube3a-as ASO	0.0345
								Ube3amΔe6/p+ + control ASO vs. Ube3amΔe6/p+ + Snord115 ASO	0.7132
								Ube3amΔe6/p+ + Ube3a-as ASO vs. Ube3amΔe6/p+ + Snord115 ASO	>0.9999
Fig 5I	EEG (PSD analysis: relative band power)		10 weeks post ASO injection (p10wks)		Kruskal Wallis test (Dunn's multiple comparison)	7/7/7/9	0.0117	WT + control ASO vs. Ube3amΔe6/p+ + control ASO	0.0121
								WT + control ASO vs. Ube3amΔe6/p+ + Ube3a-as ASO	0.1377
								WT + control ASO vs. Ube3amΔe6/p+ + Snord115 ASO	0.0742
								Ube3amΔe6/p+ + control ASO vs. Ube3amΔe6/p+ + Ube3a-as ASO	>0.9999
								Ube3amΔe6/p+ + control ASO vs. Ube3amΔe6/p+ + Snord115 ASO	>0.9999
								Ube3amΔe6/p+ + Ube3a-as ASO vs. Ube3amΔe6/p+ + Snord115 ASO	>0.9999
Fig 5 S4F	EEG (PSD analysis: relative band power)		3 weeks post ASO injection (p3wks)	Visual cortex	Kruskal Wallis test (Dunn's multiple comparison)	7/7/7/10	0.7924	WT + control ASO vs. Ube3amΔe6/p+ + control ASO	>0.9999
								WT + control ASO vs. Ube3amΔe6/p+ + Ube3a-as ASO	>0.9999
								WT + control ASO vs. Ube3amΔe6/p+ + Snord115 ASO	>0.9999
								Ube3amΔe6/p+ + control ASO vs. Ube3amΔe6/p+ + Ube3a-as ASO	>0.9999
								Ube3amΔe6/p+ + control ASO vs. Ube3amΔe6/p+ + Snord115 ASO	>0.9999
								Ube3amΔe6/p+ + Ube3a-as ASO vs. Ube3amΔe6/p+ + Snord115 ASO	>0.9999
Fig 5 S4F	EEG (PSD analysis: relative band power)		6 weeks post ASO injection (p6wks)		Kruskal Wallis test (Dunn's multiple comparison)	7/7/7/11	0.4704	WT + control ASO vs. Ube3amΔe6/p+ + control ASO	>0.9999
								WT + control ASO vs. Ube3amΔe6/p+ + Ube3a-as ASO	>0.9999
								WT + control ASO vs. Ube3amΔe6/p+ + Snord115 ASO	0.8624
								Ube3amΔe6/p+ + control ASO vs. Ube3amΔe6/p+ + Ube3a-as ASO	>0.9999
								Ube3amΔe6/p+ + control ASO vs. Ube3amΔe6/p+ + Snord115 ASO	>0.9999
								Ube3amΔe6/p+ + Ube3a-as ASO vs. Ube3amΔe6/p+ + Snord115 ASO	>0.9999
Fig 5 S4F	EEG (PSD analysis: relative band power)		10 weeks post ASO injection (p10wks)		Kruskal Wallis test (Dunn's multiple comparison)	7/7/7/12	0.1933	WT + control ASO vs. Ube3amΔe6/p+ + control ASO	>0.9999
								WT + control ASO vs. Ube3amΔe6/p+ + Ube3a-as ASO	0.3842
								WT + control ASO vs. Ube3amΔe6/p+ + Snord115 ASO	0.8102
								Ube3amΔe6/p+ + control ASO vs. Ube3amΔe6/p+ + Ube3a-as ASO	0.8102
								Ube3amΔe6/p+ + control ASO vs. Ube3amΔe6/p+ + Snord115 ASO	>0.9999
								Ube3amΔe6/p+ + Ube3a-as ASO vs. Ube3amΔe6/p+ + Snord115 ASO	>0.9999
Fig 5 S3F	EEG (PSD analysis: relative band power)		3 weeks post ASO injection (p3wks)	Somatosensory cortex	Kruskal Wallis test (Dunn's multiple comparison)	7/7/7/13	0.0328	WT + control ASO vs. Ube3amΔe6/p+ + control ASO	0.023
								WT + control ASO vs. Ube3amΔe6/p+ + Ube3a-as ASO	0.285
								WT + control ASO vs. Ube3amΔe6/p+ + Snord115 ASO	0.7132
								Ube3amΔe6/p+ + control ASO vs. Ube3amΔe6/p+ + Ube3a-as ASO	>0.9999
								Ube3amΔe6/p+ + control ASO vs. Ube3amΔe6/p+ + Snord115 ASO	>0.9999
								Ube3amΔe6/p+ + Ube3a-as ASO vs. Ube3amΔe6/p+ + Snord115 ASO	>0.9999
Fig 5 S3F	EEG (PSD analysis: relative band power)		6 weeks post ASO injection (p6wks)		Kruskal Wallis test (Dunn's multiple comparison)	7/7/7/14	0.1207	WT + control ASO vs. Ube3amΔe6/p+ + control ASO	0.3315
								WT + control ASO vs. Ube3amΔe6/p+ + Ube3a-as ASO	>0.9999
								WT + control ASO vs. Ube3amΔe6/p+ + Snord115 ASO	0.2082
								Ube3amΔe6/p+ + control ASO vs. Ube3amΔe6/p+ + Ube3a-as ASO	>0.9999
								Ube3amΔe6/p+ + control ASO vs. Ube3amΔe6/p+ + Snord115 ASO	>0.9999
								Ube3amΔe6/p+ + Ube3a-as ASO vs. Ube3amΔe6/p+ + Snord115 ASO	>0.9999
Fig 5 S3F	EEG (PSD analysis: relative band power)		10 weeks post ASO injection (p10wks)		Kruskal Wallis test (Dunn's multiple comparison)	7/7/7/15	0.0125	WT + control ASO vs. Ube3amΔe6/p+ + control ASO	0.0381
								WT + control ASO vs. Ube3amΔe6/p+ + Ube3a-as ASO	0.0972
								WT + control ASO vs. Ube3amΔe6/p+ + Snord115 ASO	0.0255
								Ube3amΔe6/p+ + control ASO vs. Ube3amΔe6/p+ + Ube3a-as ASO	>0.9999
								Ube3amΔe6/p+ + control ASO vs. Ube3amΔe6/p+ + Snord115 ASO	>0.9999
								Ube3amΔe6/p+ + Ube3a-as ASO vs. Ube3amΔe6/p+ + Snord115 ASO	>0.9999

## Sheet: EEG-sleep
Figure	Experiment	ASO injection age	Timepoints after ASO injection	Brain state	Cycle	Statistical test	n (mouse): WT + control ASO / Ube3amΔe6/p+ + control ASO / Ube3amΔe6/p+ + Ube3a-as ASO / Ube3amΔe6/p+ + Snord115 ASO	P value (summary with genotype as source of variation)	Multiple comparison
									Genotype pair	P value
Fig 6C	EEG (Sleep stage analysis)	Juvenile	3 weeks post ASO injection (p3wks)	Wake	Light	Two-way ANOVA (Tukey multiple comparison)	9/9/9/8	0.4707	WT + control ASO vs. Ube3amΔe6/p+ + control ASO	0.2868
									WT + control ASO vs. Ube3amΔe6/p+ + Ube3a-as ASO	0.677
									WT + control ASO vs. Ube3amΔe6/p+ + Snord115 ASO	0.7367
									Ube3amΔe6/p+ + control ASO vs. Ube3amΔe6/p+ + Ube3a-as ASO	0.9082
									Ube3amΔe6/p+ + control ASO vs. Ube3amΔe6/p+ + Snord115 ASO	0.8905
									Ube3amΔe6/p+ + Ube3a-as ASO vs. Ube3amΔe6/p+ + Snord115 ASO	0.9999
					Dark				WT + control ASO vs. Ube3amΔe6/p+ + control ASO	0.3428
									WT + control ASO vs. Ube3amΔe6/p+ + Ube3a-as ASO	0.9637
									WT + control ASO vs. Ube3amΔe6/p+ + Snord115 ASO	0.4355
									Ube3amΔe6/p+ + control ASO vs. Ube3amΔe6/p+ + Ube3a-as ASO	0.6279
									Ube3amΔe6/p+ + control ASO vs. Ube3amΔe6/p+ + Snord115 ASO	0.9994
									Ube3amΔe6/p+ + Ube3a-as ASO vs. Ube3amΔe6/p+ + Snord115 ASO	0.7207
Fig 6B	EEG (Sleep stage analysis)			NREM	Light	Two-way ANOVA (Tukey multiple comparison)	9/9/9/8	0.2216	WT + control ASO vs. Ube3amΔe6/p+ + control ASO	0.0178
									WT + control ASO vs. Ube3amΔe6/p+ + Ube3a-as ASO	0.6808
									WT + control ASO vs. Ube3amΔe6/p+ + Snord115 ASO	0.6902
									Ube3amΔe6/p+ + control ASO vs. Ube3amΔe6/p+ + Ube3a-as ASO	0.2292
									Ube3amΔe6/p+ + control ASO vs. Ube3amΔe6/p+ + Snord115 ASO	0.2614
									Ube3amΔe6/p+ + Ube3a-as ASO vs. Ube3amΔe6/p+ + Snord115 ASO	>0.9999
					Dark				WT + control ASO vs. Ube3amΔe6/p+ + control ASO	0.5217
									WT + control ASO vs. Ube3amΔe6/p+ + Ube3a-as ASO	0.9816
									WT + control ASO vs. Ube3amΔe6/p+ + Snord115 ASO	0.5659
									Ube3amΔe6/p+ + control ASO vs. Ube3amΔe6/p+ + Ube3a-as ASO	0.7528
									Ube3amΔe6/p+ + control ASO vs. Ube3amΔe6/p+ + Snord115 ASO	>0.9999
									Ube3amΔe6/p+ + Ube3a-as ASO vs. Ube3amΔe6/p+ + Snord115 ASO	0.786
Fig 6A	EEG (Sleep stage analysis)			REM	Light	Two-way ANOVA (Tukey multiple comparison)	9/9/9/8	0.0237	WT + control ASO vs. Ube3amΔe6/p+ + control ASO	0.0173
									WT + control ASO vs. Ube3amΔe6/p+ + Ube3a-as ASO	0.9975
									WT + control ASO vs. Ube3amΔe6/p+ + Snord115 ASO	>0.9999
									Ube3amΔe6/p+ + control ASO vs. Ube3amΔe6/p+ + Ube3a-as ASO	0.0101
									Ube3amΔe6/p+ + control ASO vs. Ube3amΔe6/p+ + Snord115 ASO	0.0253
									Ube3amΔe6/p+ + Ube3a-as ASO vs. Ube3amΔe6/p+ + Snord115 ASO	0.9954
					Dark				WT + control ASO vs. Ube3amΔe6/p+ + control ASO	0.7015
									WT + control ASO vs. Ube3amΔe6/p+ + Ube3a-as ASO	0.9859
									WT + control ASO vs. Ube3amΔe6/p+ + Snord115 ASO	0.8531
									Ube3amΔe6/p+ + control ASO vs. Ube3amΔe6/p+ + Ube3a-as ASO	0.8812
									Ube3amΔe6/p+ + control ASO vs. Ube3amΔe6/p+ + Snord115 ASO	0.9946
									Ube3amΔe6/p+ + Ube3a-as ASO vs. Ube3amΔe6/p+ + Snord115 ASO	0.9657
Fig 6C	EEG (Sleep stage analysis)		6 weeks post ASO injection (p6wks)	Wake	Light	Two-way ANOVA (Tukey multiple comparison)	9/9/9/8	0.9664	WT + control ASO vs. Ube3amΔe6/p+ + control ASO	0.4698
									WT + control ASO vs. Ube3amΔe6/p+ + Ube3a-as ASO	0.9901
									WT + control ASO vs. Ube3amΔe6/p+ + Snord115 ASO	0.8886
									Ube3amΔe6/p+ + control ASO vs. Ube3amΔe6/p+ + Ube3a-as ASO	0.3018
									Ube3amΔe6/p+ + control ASO vs. Ube3amΔe6/p+ + Snord115 ASO	0.8996
									Ube3amΔe6/p+ + Ube3a-as ASO vs. Ube3amΔe6/p+ + Snord115 ASO	0.7407
					Dark				WT + control ASO vs. Ube3amΔe6/p+ + control ASO	0.6458
									WT + control ASO vs. Ube3amΔe6/p+ + Ube3a-as ASO	0.7823
									WT + control ASO vs. Ube3amΔe6/p+ + Snord115 ASO	0.9898
									Ube3amΔe6/p+ + control ASO vs. Ube3amΔe6/p+ + Ube3a-as ASO	0.1595
									Ube3amΔe6/p+ + control ASO vs. Ube3amΔe6/p+ + Snord115 ASO	0.8397
									Ube3amΔe6/p+ + Ube3a-as ASO vs. Ube3amΔe6/p+ + Snord115 ASO	0.6156
Fig 6B	EEG (Sleep stage analysis)			NREM	Light	Two-way ANOVA (Tukey multiple comparison)	9/9/9/8	0.74	WT + control ASO vs. Ube3amΔe6/p+ + control ASO	0.1087
									WT + control ASO vs. Ube3amΔe6/p+ + Ube3a-as ASO	0.9349
									WT + control ASO vs. Ube3amΔe6/p+ + Snord115 ASO	0.942
									Ube3amΔe6/p+ + control ASO vs. Ube3amΔe6/p+ + Ube3a-as ASO	0.0264
									Ube3amΔe6/p+ + control ASO vs. Ube3amΔe6/p+ + Snord115 ASO	0.3492
									Ube3amΔe6/p+ + Ube3a-as ASO vs. Ube3amΔe6/p+ + Snord115 ASO	0.6682
					Dark				WT + control ASO vs. Ube3amΔe6/p+ + control ASO	0.8453
									WT + control ASO vs. Ube3amΔe6/p+ + Ube3a-as ASO	0.8566
									WT + control ASO vs. Ube3amΔe6/p+ + Snord115 ASO	0.9995
									Ube3amΔe6/p+ + control ASO vs. Ube3amΔe6/p+ + Ube3a-as ASO	0.3786
									Ube3amΔe6/p+ + control ASO vs. Ube3amΔe6/p+ + Snord115 ASO	0.9044
									Ube3amΔe6/p+ + Ube3a-as ASO vs. Ube3amΔe6/p+ + Snord115 ASO	0.8123
Fig 6A	EEG (Sleep stage analysis)			REM	Light	Two-way ANOVA (Tukey multiple comparison)	9/9/9/8	0.0234	WT + control ASO vs. Ube3amΔe6/p+ + control ASO	0.0801
									WT + control ASO vs. Ube3amΔe6/p+ + Ube3a-as ASO	0.8388
									WT + control ASO vs. Ube3amΔe6/p+ + Snord115 ASO	0.9583
									Ube3amΔe6/p+ + control ASO vs. Ube3amΔe6/p+ + Ube3a-as ASO	0.0092
									Ube3amΔe6/p+ + control ASO vs. Ube3amΔe6/p+ + Snord115 ASO	0.028
									Ube3amΔe6/p+ + Ube3a-as ASO vs. Ube3amΔe6/p+ + Snord115 ASO	0.99
					Dark				WT + control ASO vs. Ube3amΔe6/p+ + control ASO	0.6786
									WT + control ASO vs. Ube3amΔe6/p+ + Ube3a-as ASO	0.9608
									WT + control ASO vs. Ube3amΔe6/p+ + Snord115 ASO	0.9342
									Ube3amΔe6/p+ + control ASO vs. Ube3amΔe6/p+ + Ube3a-as ASO	0.38
									Ube3amΔe6/p+ + control ASO vs. Ube3amΔe6/p+ + Snord115 ASO	0.96
									Ube3amΔe6/p+ + Ube3a-as ASO vs. Ube3amΔe6/p+ + Snord115 ASO	0.71
Fig 6C	EEG (Sleep stage analysis)		10 weeks post ASO injection (p10wks)	Wake	Light	Two-way ANOVA (Tukey multiple comparison)	9/9/9/8	0.4276	WT + control ASO vs. Ube3amΔe6/p+ + control ASO	0.9979
									WT + control ASO vs. Ube3amΔe6/p+ + Ube3a-as ASO	>0.9999
									WT + control ASO vs. Ube3amΔe6/p+ + Snord115 ASO	0.4644
									Ube3amΔe6/p+ + control ASO vs. Ube3amΔe6/p+ + Ube3a-as ASO	0.9967
									Ube3amΔe6/p+ + control ASO vs. Ube3amΔe6/p+ + Snord115 ASO	0.5723
									Ube3amΔe6/p+ + Ube3a-as ASO vs. Ube3amΔe6/p+ + Snord115 ASO	0.4466
					Dark				WT + control ASO vs. Ube3amΔe6/p+ + control ASO	0.991
									WT + control ASO vs. Ube3amΔe6/p+ + Ube3a-as ASO	0.9134
									WT + control ASO vs. Ube3amΔe6/p+ + Snord115 ASO	0.9999
									Ube3amΔe6/p+ + control ASO vs. Ube3amΔe6/p+ + Ube3a-as ASO	0.7782
									Ube3amΔe6/p+ + control ASO vs. Ube3amΔe6/p+ + Snord115 ASO	0.9844
									Ube3amΔe6/p+ + Ube3a-as ASO vs. Ube3amΔe6/p+ + Snord115 ASO	0.942
Fig 6B	EEG (Sleep stage analysis)			NREM	Light	Two-way ANOVA (Tukey multiple comparison)	9/9/9/8	0.4171	WT + control ASO vs. Ube3amΔe6/p+ + control ASO	0.8587
									WT + control ASO vs. Ube3amΔe6/p+ + Ube3a-as ASO	0.9801
									WT + control ASO vs. Ube3amΔe6/p+ + Snord115 ASO	0.2175
									Ube3amΔe6/p+ + control ASO vs. Ube3amΔe6/p+ + Ube3a-as ASO	0.9777
									Ube3amΔe6/p+ + control ASO vs. Ube3amΔe6/p+ + Snord115 ASO	0.6382
									Ube3amΔe6/p+ + Ube3a-as ASO vs. Ube3amΔe6/p+ + Snord115 ASO	0.3993
					Dark				WT + control ASO vs. Ube3amΔe6/p+ + control ASO	0.9987
									WT + control ASO vs. Ube3amΔe6/p+ + Ube3a-as ASO	0.9212
									WT + control ASO vs. Ube3amΔe6/p+ + Snord115 ASO	0.9957
									Ube3amΔe6/p+ + control ASO vs. Ube3amΔe6/p+ + Ube3a-as ASO	0.8604
									Ube3amΔe6/p+ + control ASO vs. Ube3amΔe6/p+ + Snord115 ASO	0.9813
									Ube3amΔe6/p+ + Ube3a-as ASO vs. Ube3amΔe6/p+ + Snord115 ASO	0.9805
Fig 6A	EEG (Sleep stage analysis)			REM	Light	Two-way ANOVA (Tukey multiple comparison)	9/9/9/8	0.1901	WT + control ASO vs. Ube3amΔe6/p+ + control ASO	0.0831
									WT + control ASO vs. Ube3amΔe6/p+ + Ube3a-as ASO	0.3467
									WT + control ASO vs. Ube3amΔe6/p+ + Snord115 ASO	0.2736
									Ube3amΔe6/p+ + control ASO vs. Ube3amΔe6/p+ + Ube3a-as ASO	0.8759
									Ube3amΔe6/p+ + control ASO vs. Ube3amΔe6/p+ + Snord115 ASO	0.9513
									Ube3amΔe6/p+ + Ube3a-as ASO vs. Ube3amΔe6/p+ + Snord115 ASO	0.9972
					Dark				WT + control ASO vs. Ube3amΔe6/p+ + control ASO	0.9354
									WT + control ASO vs. Ube3amΔe6/p+ + Ube3a-as ASO	0.9989
									WT + control ASO vs. Ube3amΔe6/p+ + Snord115 ASO	0.9222
									Ube3amΔe6/p+ + control ASO vs. Ube3amΔe6/p+ + Ube3a-as ASO	0.8829
									Ube3amΔe6/p+ + control ASO vs. Ube3amΔe6/p+ + Snord115 ASO	>0.9999
									Ube3amΔe6/p+ + Ube3a-as ASO vs. Ube3amΔe6/p+ + Snord115 ASO	0.867
Fig 6F	EEG (Sleep stage analysis)	Adult	3 weeks post ASO injection (p3wks)	Wake	Light	Two-way ANOVA (Tukey multiple comparison)	7/7/7/7	0.2594	WT + control ASO vs. Ube3amΔe6/p+ + control ASO	0.2888
									WT + control ASO vs. Ube3amΔe6/p+ + Ube3a-as ASO	0.9627
									WT + control ASO vs. Ube3amΔe6/p+ + Snord115 ASO	0.5302
									Ube3amΔe6/p+ + control ASO vs. Ube3amΔe6/p+ + Ube3a-as ASO	0.5603
									Ube3amΔe6/p+ + control ASO vs. Ube3amΔe6/p+ + Snord115 ASO	0.9723
									Ube3amΔe6/p+ + Ube3a-as ASO vs. Ube3amΔe6/p+ + Snord115 ASO	0.8164
					Dark				WT + control ASO vs. Ube3amΔe6/p+ + control ASO	0.7002
									WT + control ASO vs. Ube3amΔe6/p+ + Ube3a-as ASO	0.5428
									WT + control ASO vs. Ube3amΔe6/p+ + Snord115 ASO	0.8468
									Ube3amΔe6/p+ + control ASO vs. Ube3amΔe6/p+ + Ube3a-as ASO	0.9942
									Ube3amΔe6/p+ + control ASO vs. Ube3amΔe6/p+ + Snord115 ASO	0.9931
									Ube3amΔe6/p+ + Ube3a-as ASO vs. Ube3amΔe6/p+ + Snord115 ASO	0.9529
Fig 6E	EEG (Sleep stage analysis)			NREM	Light	Two-way ANOVA (Tukey multiple comparison)	7/7/7/7	0.0446	WT + control ASO vs. Ube3amΔe6/p+ + control ASO	0.0874
									WT + control ASO vs. Ube3amΔe6/p+ + Ube3a-as ASO	0.9475
									WT + control ASO vs. Ube3amΔe6/p+ + Snord115 ASO	0.375
									Ube3amΔe6/p+ + control ASO vs. Ube3amΔe6/p+ + Ube3a-as ASO	0.2535
									Ube3amΔe6/p+ + control ASO vs. Ube3amΔe6/p+ + Snord115 ASO	0.8574
									Ube3amΔe6/p+ + Ube3a-as ASO vs. Ube3amΔe6/p+ + Snord115 ASO	0.7037
					Dark				WT + control ASO vs. Ube3amΔe6/p+ + control ASO	0.919
									WT + control ASO vs. Ube3amΔe6/p+ + Ube3a-as ASO	0.7468
									WT + control ASO vs. Ube3amΔe6/p+ + Snord115 ASO	0.9279
									Ube3amΔe6/p+ + control ASO vs. Ube3amΔe6/p+ + Ube3a-as ASO	0.9829
									Ube3amΔe6/p+ + control ASO vs. Ube3amΔe6/p+ + Snord115 ASO	>0.9999
									Ube3amΔe6/p+ + Ube3a-as ASO vs. Ube3amΔe6/p+ + Snord115 ASO	0.979
Fig 6D	EEG (Sleep stage analysis)			REM	Light	Two-way ANOVA (Tukey multiple comparison)	7/7/7/7	0.2188	WT + control ASO vs. Ube3amΔe6/p+ + control ASO	0.5117
									WT + control ASO vs. Ube3amΔe6/p+ + Ube3a-as ASO	>0.9999
									WT + control ASO vs. Ube3amΔe6/p+ + Snord115 ASO	0.9767
									Ube3amΔe6/p+ + control ASO vs. Ube3amΔe6/p+ + Ube3a-as ASO	0.5415
									Ube3amΔe6/p+ + control ASO vs. Ube3amΔe6/p+ + Snord115 ASO	0.7605
									Ube3amΔe6/p+ + Ube3a-as ASO vs. Ube3amΔe6/p+ + Snord115 ASO	0.9838
					Dark				WT + control ASO vs. Ube3amΔe6/p+ + control ASO	0.328
									WT + control ASO vs. Ube3amΔe6/p+ + Ube3a-as ASO	0.481
									WT + control ASO vs. Ube3amΔe6/p+ + Snord115 ASO	0.853
									Ube3amΔe6/p+ + control ASO vs. Ube3amΔe6/p+ + Ube3a-as ASO	0.9928
									Ube3amΔe6/p+ + control ASO vs. Ube3amΔe6/p+ + Snord115 ASO	0.7989
									Ube3amΔe6/p+ + Ube3a-as ASO vs. Ube3amΔe6/p+ + Snord115 ASO	0.9191
Fig 6F	EEG (Sleep stage analysis)		6 weeks post ASO injection (p6wks)	Wake	Light	Two-way ANOVA (Tukey multiple comparison)	7/7/7/7	0.077	WT + control ASO vs. Ube3amΔe6/p+ + control ASO	0.6787
									WT + control ASO vs. Ube3amΔe6/p+ + Ube3a-as ASO	0.9688
									WT + control ASO vs. Ube3amΔe6/p+ + Snord115 ASO	0.7715
									Ube3amΔe6/p+ + control ASO vs. Ube3amΔe6/p+ + Ube3a-as ASO	0.4032
									Ube3amΔe6/p+ + control ASO vs. Ube3amΔe6/p+ + Snord115 ASO	0.9986
									Ube3amΔe6/p+ + Ube3a-as ASO vs. Ube3amΔe6/p+ + Snord115 ASO	0.4967
					Dark				WT + control ASO vs. Ube3amΔe6/p+ + control ASO	0.9928
									WT + control ASO vs. Ube3amΔe6/p+ + Ube3a-as ASO	0.9801
									WT + control ASO vs. Ube3amΔe6/p+ + Snord115 ASO	0.8752
									Ube3amΔe6/p+ + control ASO vs. Ube3amΔe6/p+ + Ube3a-as ASO	0.9995
									Ube3amΔe6/p+ + control ASO vs. Ube3amΔe6/p+ + Snord115 ASO	0.7356
									Ube3amΔe6/p+ + Ube3a-as ASO vs. Ube3amΔe6/p+ + Snord115 ASO	0.6673
Fig 6E	EEG (Sleep stage analysis)			NREM	Light	Two-way ANOVA (Tukey multiple comparison)	7/7/7/7	0.0544	WT + control ASO vs. Ube3amΔe6/p+ + control ASO	0.2935
									WT + control ASO vs. Ube3amΔe6/p+ + Ube3a-as ASO	0.999
									WT + control ASO vs. Ube3amΔe6/p+ + Snord115 ASO	0.5925
									Ube3amΔe6/p+ + control ASO vs. Ube3amΔe6/p+ + Ube3a-as ASO	0.2319
									Ube3amΔe6/p+ + control ASO vs. Ube3amΔe6/p+ + Snord115 ASO	0.9529
									Ube3amΔe6/p+ + Ube3a-as ASO vs. Ube3amΔe6/p+ + Snord115 ASO	0.5057
					Dark				WT + control ASO vs. Ube3amΔe6/p+ + control ASO	>0.9999
									WT + control ASO vs. Ube3amΔe6/p+ + Ube3a-as ASO	0.9961
									WT + control ASO vs. Ube3amΔe6/p+ + Snord115 ASO	0.7922
									Ube3amΔe6/p+ + control ASO vs. Ube3amΔe6/p+ + Ube3a-as ASO	0.9982
									Ube3amΔe6/p+ + control ASO vs. Ube3amΔe6/p+ + Snord115 ASO	0.7645
									Ube3amΔe6/p+ + Ube3a-as ASO vs. Ube3amΔe6/p+ + Snord115 ASO	0.6633
Fig 6D	EEG (Sleep stage analysis)			REM	Light	Two-way ANOVA (Tukey multiple comparison)	7/7/7/7	0.1106	WT + control ASO vs. Ube3amΔe6/p+ + control ASO	0.0276
									WT + control ASO vs. Ube3amΔe6/p+ + Ube3a-as ASO	0.4678
									WT + control ASO vs. Ube3amΔe6/p+ + Snord115 ASO	0.5925
									Ube3amΔe6/p+ + control ASO vs. Ube3amΔe6/p+ + Ube3a-as ASO	0.4812
									Ube3amΔe6/p+ + control ASO vs. Ube3amΔe6/p+ + Snord115 ASO	0.3651
									Ube3amΔe6/p+ + Ube3a-as ASO vs. Ube3amΔe6/p+ + Snord115 ASO	0.997
					Dark				WT + control ASO vs. Ube3amΔe6/p+ + control ASO	0.7298
									WT + control ASO vs. Ube3amΔe6/p+ + Ube3a-as ASO	0.8603
									WT + control ASO vs. Ube3amΔe6/p+ + Snord115 ASO	0.8938
									Ube3amΔe6/p+ + control ASO vs. Ube3amΔe6/p+ + Ube3a-as ASO	0.9945
									Ube3amΔe6/p+ + control ASO vs. Ube3amΔe6/p+ + Snord115 ASO	0.9877
									Ube3amΔe6/p+ + Ube3a-as ASO vs. Ube3amΔe6/p+ + Snord115 ASO	0.9998
Fig 6F	EEG (Sleep stage analysis)		10 weeks post ASO injection (p10wks)	Wake	Light	Two-way ANOVA (Tukey multiple comparison)	7/7/7/7	0.0059	WT + control ASO vs. Ube3amΔe6/p+ + control ASO	0.8663
									WT + control ASO vs. Ube3amΔe6/p+ + Ube3a-as ASO	0.6201
									WT + control ASO vs. Ube3amΔe6/p+ + Snord115 ASO	0.916
									Ube3amΔe6/p+ + control ASO vs. Ube3amΔe6/p+ + Ube3a-as ASO	0.2065
									Ube3amΔe6/p+ + control ASO vs. Ube3amΔe6/p+ + Snord115 ASO	0.9993
									Ube3amΔe6/p+ + Ube3a-as ASO vs. Ube3amΔe6/p+ + Snord115 ASO	0.2575
					Dark				WT + control ASO vs. Ube3amΔe6/p+ + control ASO	0.8426
									WT + control ASO vs. Ube3amΔe6/p+ + Ube3a-as ASO	0.7369
									WT + control ASO vs. Ube3amΔe6/p+ + Snord115 ASO	0.0612
									Ube3amΔe6/p+ + control ASO vs. Ube3amΔe6/p+ + Ube3a-as ASO	0.9972
									Ube3amΔe6/p+ + control ASO vs. Ube3amΔe6/p+ + Snord115 ASO	0.3095
									Ube3amΔe6/p+ + Ube3a-as ASO vs. Ube3amΔe6/p+ + Snord115 ASO	0.4152
Fig 6E	EEG (Sleep stage analysis)			NREM	Light	Two-way ANOVA (Tukey multiple comparison)	7/7/7/7	0.0026	WT + control ASO vs. Ube3amΔe6/p+ + control ASO	0.09
									WT + control ASO vs. Ube3amΔe6/p+ + Ube3a-as ASO	0.9641
									WT + control ASO vs. Ube3amΔe6/p+ + Snord115 ASO	0.3495
									Ube3amΔe6/p+ + control ASO vs. Ube3amΔe6/p+ + Ube3a-as ASO	0.0293
									Ube3amΔe6/p+ + control ASO vs. Ube3amΔe6/p+ + Snord115 ASO	0.8839
									Ube3amΔe6/p+ + Ube3a-as ASO vs. Ube3amΔe6/p+ + Snord115 ASO	0.153
					Dark				WT + control ASO vs. Ube3amΔe6/p+ + control ASO	0.7172
									WT + control ASO vs. Ube3amΔe6/p+ + Ube3a-as ASO	0.7712
									WT + control ASO vs. Ube3amΔe6/p+ + Snord115 ASO	0.0743
									Ube3amΔe6/p+ + control ASO vs. Ube3amΔe6/p+ + Ube3a-as ASO	0.9997
									Ube3amΔe6/p+ + control ASO vs. Ube3amΔe6/p+ + Snord115 ASO	0.4851
									Ube3amΔe6/p+ + Ube3a-as ASO vs. Ube3amΔe6/p+ + Snord115 ASO	0.4293
Fig 6D	EEG (Sleep stage analysis)			REM	Light	Two-way ANOVA (Tukey multiple comparison)	7/7/7/7	0.032	WT + control ASO vs. Ube3amΔe6/p+ + control ASO	0.0005
									WT + control ASO vs. Ube3amΔe6/p+ + Ube3a-as ASO	0.2701
									WT + control ASO vs. Ube3amΔe6/p+ + Snord115 ASO	0.044
									Ube3amΔe6/p+ + control ASO vs. Ube3amΔe6/p+ + Ube3a-as ASO	0.0783
									Ube3amΔe6/p+ + control ASO vs. Ube3amΔe6/p+ + Snord115 ASO	0.3959
									Ube3amΔe6/p+ + Ube3a-as ASO vs. Ube3amΔe6/p+ + Snord115 ASO	0.815
					Dark				WT + control ASO vs. Ube3amΔe6/p+ + control ASO	0.9093
									WT + control ASO vs. Ube3amΔe6/p+ + Ube3a-as ASO	0.9998
									WT + control ASO vs. Ube3amΔe6/p+ + Snord115 ASO	>0.9999
									Ube3amΔe6/p+ + control ASO vs. Ube3amΔe6/p+ + Ube3a-as ASO	0.8777
									Ube3amΔe6/p+ + control ASO vs. Ube3amΔe6/p+ + Snord115 ASO	0.8992
									Ube3amΔe6/p+ + Ube3a-as ASO vs. Ube3amΔe6/p+ + Snord115 ASO	>0.9999

[truncated: 3 more sheets: SPINDLE validation, EEG-polyspike, Protein-EEG correlations]
