# Supplementary figures and images for: Antisense oligonucleotide therapy rescues disturbed brain rhythms and sleep in juvenile and adult mouse models of Angelman syndrome
Source: eLife journal article supplement (doi:10.7554/elife.81892), 2023-01-03

Figure 3-supplement 1B. Olfactory bulb

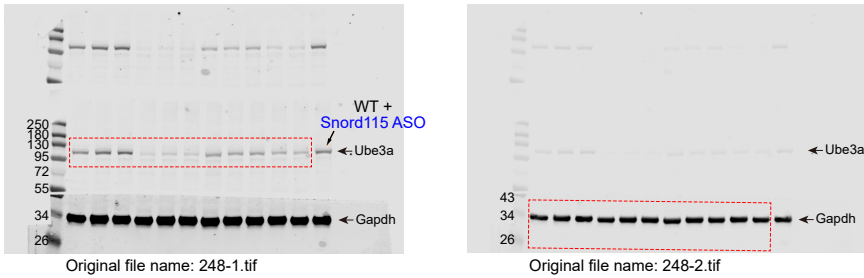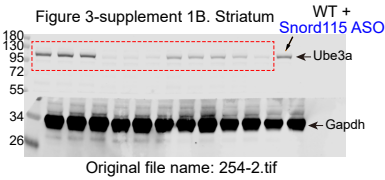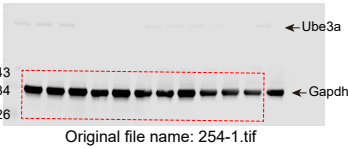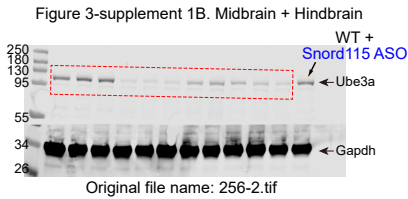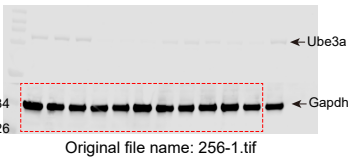

Supplement: fig3-figsupp1-data3 [file elife-81892-fig3-figsupp1-data3-v2.zip]

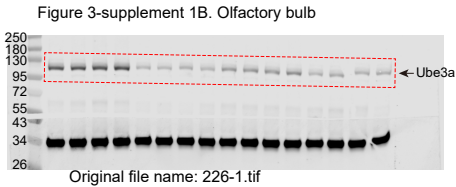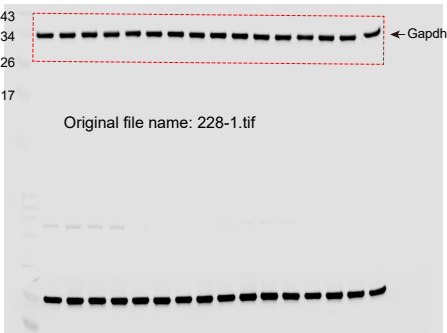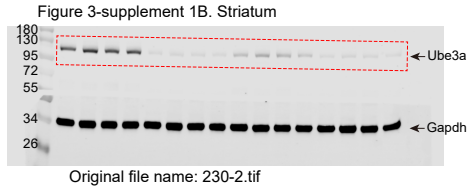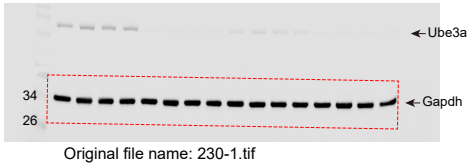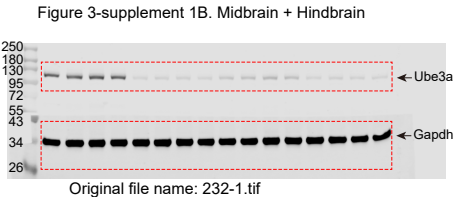

Supplement: fig3-figsupp1-data4 [file elife-81892-fig3-figsupp1-data4-v2.zip]

3 weeks post ASO injection to juvenile mice

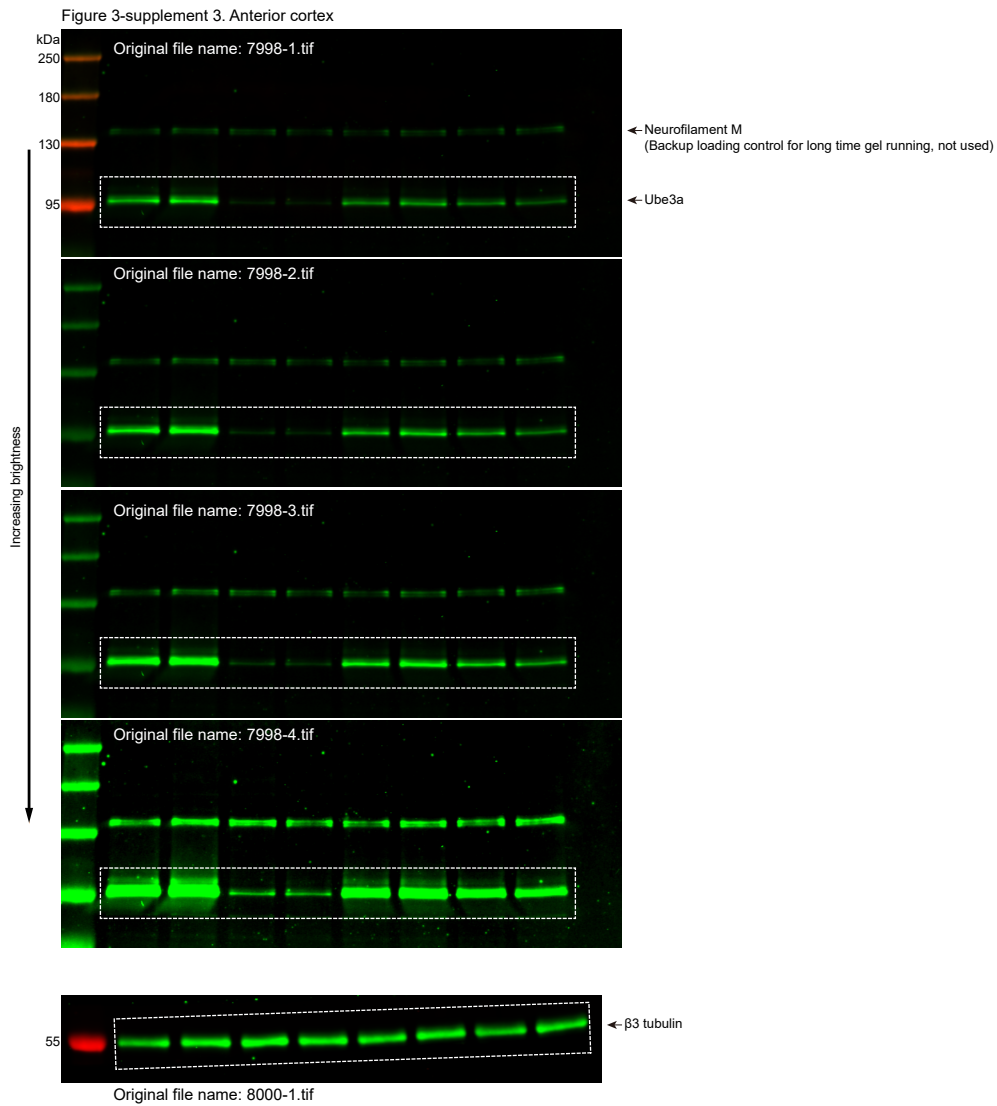

Supplement: fig3-figsupp3-data1 [file elife-81892-fig3-figsupp3-data1-v2.zip]

3 weeks post ASO injection to juvenile mice

Figure 3-supplement 3. Striatum

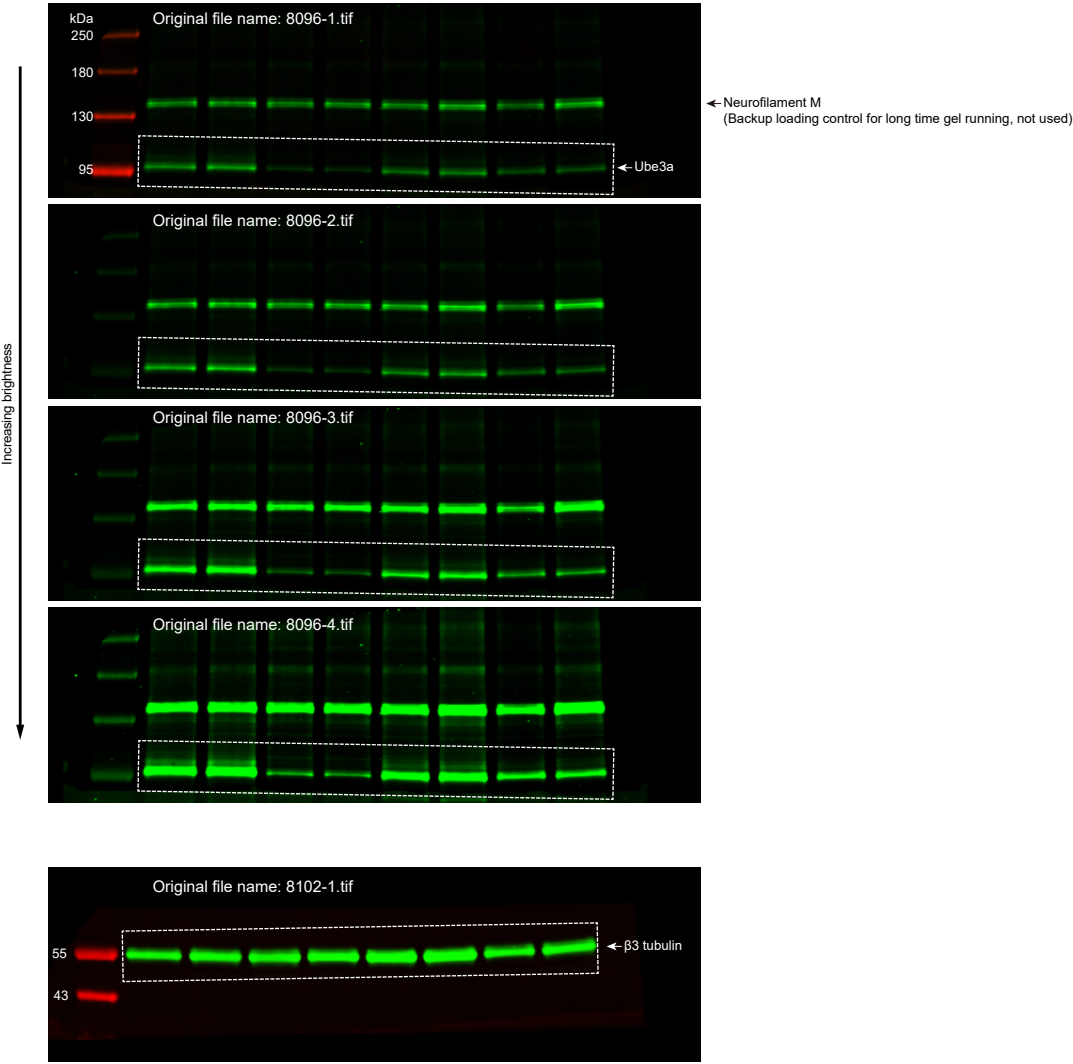

Supplement: fig3-figsupp3-data2 [file elife-81892-fig3-figsupp3-data2-v2.zip]

3 weeks post ASO injection to adult mice

Figure 3-supplement 4. Anterior cortex

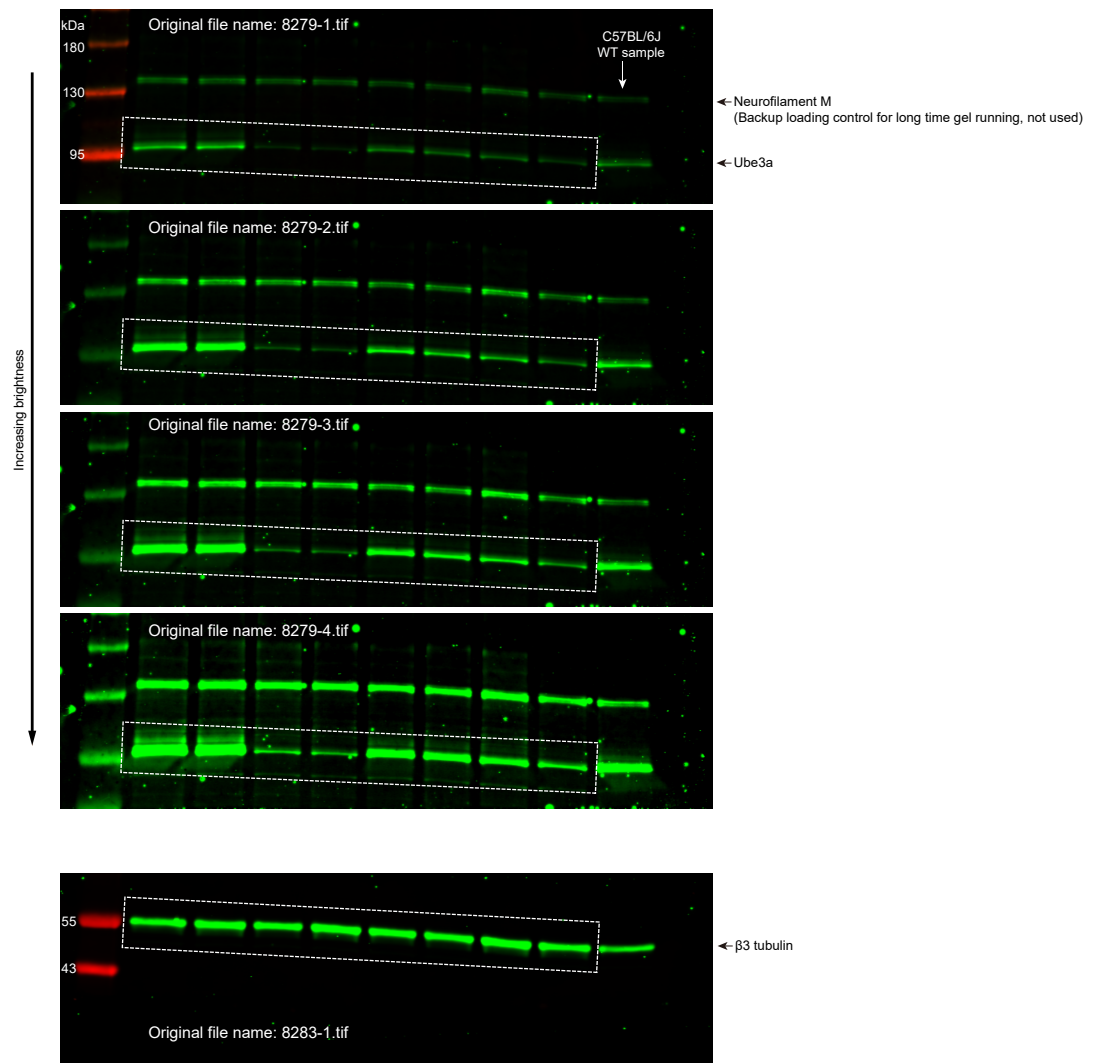

Supplement: fig3-figsupp4-data1 [file elife-81892-fig3-figsupp4-data1-v2.zip]

3 weeks post ASO injection to adult mice

Figure 3-supplement 4. Hippocampus

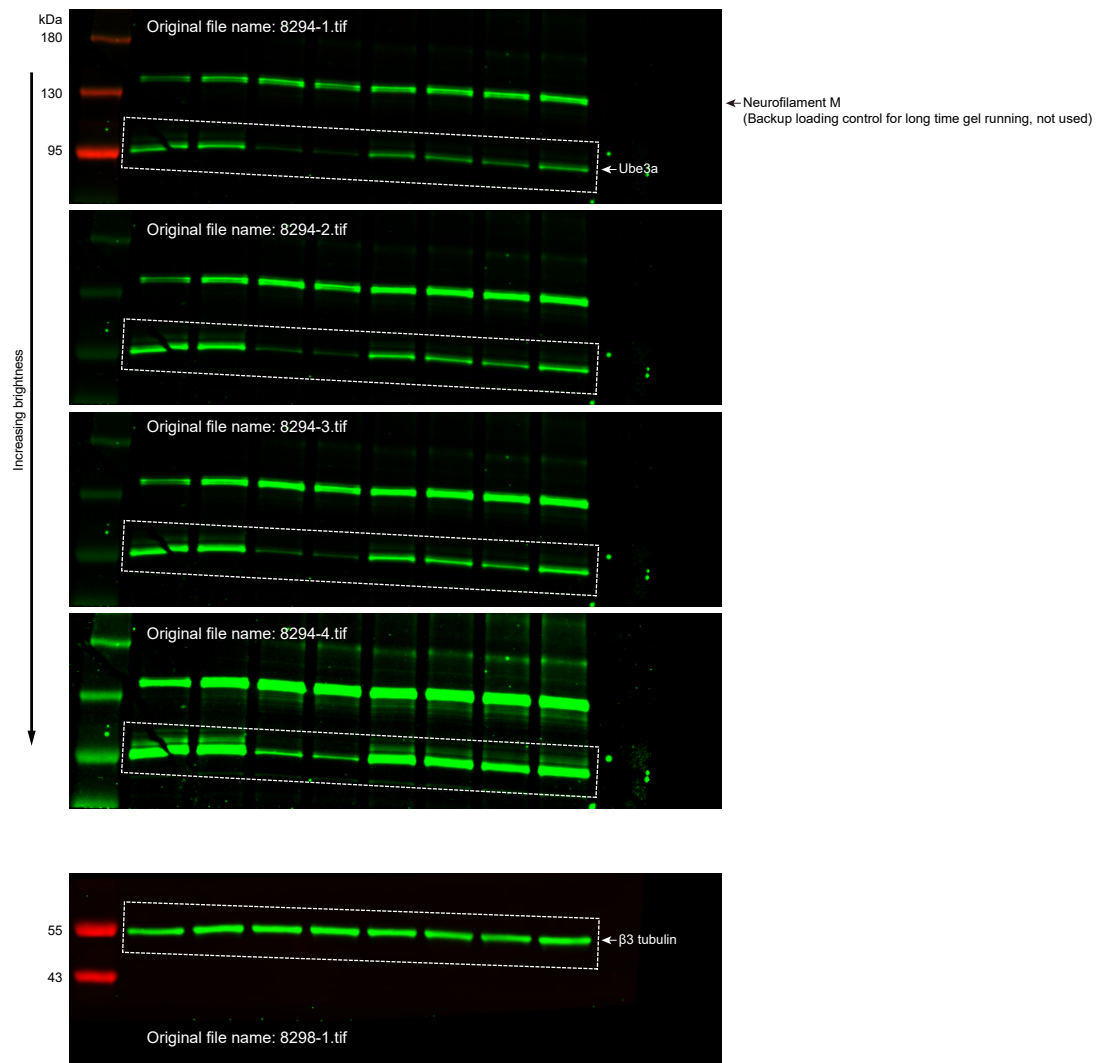

Supplement: fig3-figsupp4-data2 [file elife-81892-fig3-figsupp4-data2-v2.zip]
